# Supplementary material for: Polymicrobial empyema; a novel case of Actinomyces turicensis
Source: PubMed Central journal article supplement — Respir Med Case Rep. 2021 Feb 24;32:101365. doi: 10.1016/j.rmcr.2021.101365 (PMC7935702; doi:10.1016/j.rmcr.2021.101365), 2021-02-24
Supplement: mmc1.pdf [file mmc1.pdf]

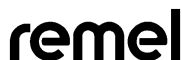

# RapID ANA II System

## INTENDED USE

Remel RapID™ ANA II System is a qualitative micromethod employing conventional and chromogenic substrates for identification of medically important anaerobic bacteria isolated from human clinical specimens. The use of RapID ANA II System for identification and differentiation of anaerobic bacteria of veterinary origin has not been fully established. A complete listing of the organisms addressed by RapID ANA II System is provided in the RapID ANA II Differential Charts.

## SUMMARY AND EXPLANATION

RapID ANA II System is comprised of (1) RapID ANA II Panels and (2) RapID ANA II Reagent. Each RapID ANA II Panel has several reaction cavities molded into the periphery of a plastic disposable tray. Reaction cavities contain dehydrated reactants and the tray allows the simultaneous inoculation of each cavity with a predetermined amount of inoculum. A suspension of the test organism in RapID Inoculation Fluid is used as the inoculum which rehydrates and initiates test reactions. After incubation of the panel, each test cavity is examined for reactivity by noting the development of a color. In some cases, reagents must be added to the test cavities to provide a color change. The resulting pattern of positive and negative test scores is used as the basis for identification of the test isolate by comparison of test results to reactivity patterns stored in an Electronic RapID Compendium (ERIC™) database or by use of the RapID ANA II Differential Chart.

## PRINCIPLE

The tests used in RapID ANA II System are based on microbial degradation of specific substrates detected by various indicator systems. The reactions employed are a combination of conventional tests and single-substrate chromogenic tests, described in Table 1.

## REAGENTS\*

|                                                              |             |
|--------------------------------------------------------------|-------------|
| <b>RapID ANA II Reagent</b> (provided with kit)              | (15 ml/Btl) |
| Reactive ingredient per liter:                               |             |
| p-Dimethylaminocinnamaldehyde.....                           | 0.06 g      |
| <b>RapID Inoculation Fluid</b> (R8325102, sold separately)   | (1 ml/tube) |
| KCl.....                                                     | 6.0 g       |
| CaCl <sub>2</sub> .....                                      | 0.5 g       |
| Deminerlized Water.....                                      | 1000.0 ml   |
| <b>RapID Spot Indole Reagent</b> (R8309002, sold separately) | (15 ml/Btl) |
| p-Dimethylaminocinnamaldehyde.....                           | 10.0 g      |
| Hydrochloric Acid.....                                       | 100.0 ml    |
| Deminerlized Water.....                                      | 900.0 ml    |

\*Adjusted as required to meet performance standards.

## PRECAUTIONS

This product is for *In Vitro* diagnostic use and should be used by properly trained individuals. Precautions should be taken against the dangers of microbiological hazards by properly sterilizing specimens, containers, media, and test panels after use. Directions should be read and followed carefully.

### Caution!

1. RapID ANA II Reagent is toxic and may cause harm to the environment. Harmful by inhalation, contact with skin or eyes, or if swallowed. May impair fertility or cause harm to unborn child.
2. RapID Spot Indole Reagent may cause irritation to skin, eyes, and respiratory system.
3. Refer to Safety Data Sheet for detailed information on reagent chemicals.

### Composition / information on ingredients

2-Methoxyethanol 109-86-4  
Acetic acid 64-19-7  
Hydrochloric acid 7647-01-0

**Signal Word**  
**DANGER**

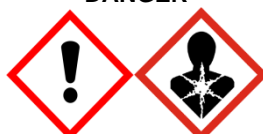

US Only

US & EU

## Hazard Statements

- Causes skin irritation
- Causes serious eye irritation
- May cause respiratory irritation
- May cause drowsiness or dizziness
- May damage fertility. May damage the unborn child
- May cause damage to organs through prolonged or repeated Exposure

## Precautionary Statements

- Prevention
- Obtain special instructions before use
- Do not handle until all safety precautions have been read and understood
- Use personal protective equipment as required
- Wash face, hands and any exposed skin thoroughly after handling
- Wear eye/face protection
- Do not breathe dust/fume/gas/mist/vapors/spray
- Use only outdoors or in a well-ventilated area

## Response

IF exposed or concerned: Get medical attention/advice

## Inhalation

IF INHALED: Remove victim to fresh air and keep at rest in a position comfortable for breathing.

## Skin

IF ON SKIN: Wash with plenty of soap and water  
If skin irritation occurs: Get medical advice/attention  
Take off contaminated clothing and wash before reuse

## Eyes

IF IN EYES: Rinse cautiously with water for several minutes. Remove contact lenses, if present and easy to do. Continue rinsing  
If eye irritation persists: Get medical advice/attention

## Storage

Store locked up  
Store in a well-ventilated place. Keep container tightly closed

## Disposal

Dispose of contents/container to an approved waste disposal plant

## Hazards not otherwise classified (HNOC)

None identified  
**WARNING!** This product contains a chemical known in the State of California to cause birth defects or other reproductive harm.

## Emergency Telephone Number

INFOTRAC - 24 Hour Number: 1-800-535-5053  
Outside of the United States, call 24 Hour Number: 001-352-323-3500 (Call Collect)

## STORAGE

Store RapID ANA II System and RapID Spot Indole Reagent in their original containers at 2-8°C until used. Allow products to equilibrate to room temperature before use. DO NOT interchange reagents among different RapID systems. Remove only the number of panels necessary for testing. Reseal the plastic pouch and promptly return to 2-8°C. Panels must be used the same day they are removed from storage. RapID Inoculation Fluid should be stored in its original container at room temperature (20-25°C).

## PRODUCT DETERIORATION

This product should not be used if (1) the color of the reagent has changed, (2) the expiration date has passed, (3) the plastic tray is broken or the lid is compromised, or (4) there are other signs of deterioration.

## SPECIMEN COLLECTION, STORAGE, AND TRANSPORT

Specimens should be collected and handled following recommended guidelines.<sup>19,20</sup>

# ENGLISH

## MATERIALS SUPPLIED

(1) 20 RapID ANA II Panels, (2) 20 report forms, (3) RapID ANA II Reagent (one plastic dropper-bottle containing reagent sufficient for 20 panels), (4) 2 chipboard incubation trays, (5) Instructions for use (IFU).

## Contents Symbols

|                         |                    |
|-------------------------|--------------------|
| <b>ANA II Panels</b>    | ANA II Panels      |
| <b>Report Forms</b>     | RapID Report Forms |
| <b>ANA II Reagent</b>   | ANA II Reagent     |
| <b>Incubation Trays</b> | Incubation Trays   |

## MATERIALS REQUIRED BUT NOT SUPPLIED

(1) Loop sterilization device, (2) Inoculating loop, swabs, collection containers, (3) Incubators, alternative environmental systems, (4) Supplemental media, (5) Quality control organisms, (6) Gram stain reagents, (7) Microscope slides, (8) Cotton swabs, (9) RapID Inoculation Fluid, 1 ml (R8325102), (10) McFarland #3 turbidity standard (R20413) or equivalent, (11) Pipettes, (12) RapID Spot Indole Reagent (R8309002), (13) ERIC (Electronic RapID Compendium, R8323600).

**Table 1. Principles and Components of the RapID ANA II System**

| Cavity #                        | Test Code       | Reactive Ingredient                                     | Quantity | Principle                                                                                                                         | Bibliography # |
|---------------------------------|-----------------|---------------------------------------------------------|----------|-----------------------------------------------------------------------------------------------------------------------------------|----------------|
| <b>Before Reagent Addition:</b> |                 |                                                         |          |                                                                                                                                   |                |
| 1                               | URE             | Urea                                                    | 0.4%     | Enzymatic hydrolysis of the colorless aryl-substituted glycoside or phosphoester releases yellow $\sigma$ - or $p$ -nitrophenol.  | 1-3            |
| 2                               | BLTS            | $p$ -Nitrophenyl- $\beta$ ,D-disaccharide               | 0.1%     |                                                                                                                                   |                |
| 3                               | $\alpha$ ARA    | $p$ -Nitrophenyl- $\alpha$ ,L-arabinoside               | 0.1%     |                                                                                                                                   |                |
| 4                               | ONPG            | $\sigma$ -Nitrophenyl- $\beta$ ,D-galactoside           | 0.1%     |                                                                                                                                   |                |
| 5                               | $\alpha$ GLU    | $p$ -Nitrophenyl- $\alpha$ ,D-glucoside                 | 0.1%     |                                                                                                                                   |                |
| 6                               | $\beta$ GLU     | $p$ -Nitrophenyl- $\beta$ ,D-glucoside                  | 0.08%    |                                                                                                                                   |                |
| 7                               | $\alpha$ GAL    | $p$ -Nitrophenyl- $\alpha$ ,D-galactoside               | 0.08%    |                                                                                                                                   |                |
| 8                               | $\alpha$ FUC    | $p$ -Nitrophenyl- $\alpha$ ,L-fucoside                  | 0.08%    |                                                                                                                                   |                |
| 9                               | NAG             | $p$ -Nitrophenyl- $n$ -acetyl- $\beta$ ,D-glucosaminide | 0.1%     |                                                                                                                                   |                |
| 10                              | PO <sub>4</sub> | $p$ -Nitrophenylphosphate                               | 0.1%     |                                                                                                                                   |                |
| <b>After Reagent Addition:</b>  |                 |                                                         |          |                                                                                                                                   |                |
| 3                               | LGY             | Leucyl-glycine- $\beta$ -naphthylamide                  | 0.08%    | Enzymatic hydrolysis of the arylamide substrate releases free $\beta$ -naphthylamine which is detected with RapID ANA II Reagent. | 6, 8-14        |
| 4                               | GLY             | Glycine- $\beta$ -naphthylamide                         | 0.08%    |                                                                                                                                   |                |
| 5                               | PRO             | Proline- $\beta$ -naphthylamide                         | 0.08%    |                                                                                                                                   |                |
| 6                               | PAL             | Phenylalanine- $\beta$ -naphthylamide                   | 0.05%    |                                                                                                                                   |                |
| 7                               | ARG             | Arginine- $\beta$ -naphthylamide                        | 0.05%    |                                                                                                                                   |                |
| 8                               | SER             | Serine- $\beta$ -naphthylamide                          | 0.08%    |                                                                                                                                   |                |
| 9                               | PYR             | Pyrrrolidonyl- $\beta$ -naphthylamide                   | 0.08%    |                                                                                                                                   |                |
| 10                              | IND             | Tryptophane                                             | 0.01%    | Utilization of the substrate results in the formation of indole which is detected with RapID Spot Indole Reagent.                 | 15, 16         |

## PROCEDURE

### Inoculum Preparation:

- Test organisms must be grown anaerobically in pure culture and examined by Gram stain prior to use in the system.
- Test organisms may be removed from a variety of selective and nonselective agar media. The following types of media are recommended:

Nonselective Media: CDC Anaerobic Blood Agar; 5-7% Sheep Blood Agar prepared with Brucella, Columbia, Brain Heart Infusion, Lombard-Dowell, or Tryptic Soy base.

Differential or Selective Media: Phenylethyl Alcohol (PEA) Agar; Egg Yolk Agar (EYA); Paromomycin/Vancomycin (PV) Agar; Kanamycin/Vancomycin (KV) Agar.

### Notes:

- “Reducible agars” containing palladium chloride or other reducing agents should NOT be used, as the reducing agents may interfere with certain enzymatic activities.
  - Kanamycin Bile Esculin (KBE) Agar and Bacteroides Bile Esculin (BBE) Agar are NOT recommended since the ferric-esculetin complex that may be formed can interfere with test interpretation.
  - Some media containing or supplemented with mono- or disaccharides are NOT recommended since they may suppress glycolytic activity and reduce test reactivity. Most formulations of Schaedler agar contain sufficient dextrose to interfere with glycosidase activity.
  - Cultures used for inoculum preparation should be less than 72 hours old (preferably 18-24 hours old).
  - The use of media other than those recommended may compromise test performance.
- Using a cotton swab or inoculating loop, suspend sufficient growth from the agar plate culture in RapID Inoculation Fluid (1 ml) to

achieve a visual turbidity equal to a #3 McFarland turbidity standard or equivalent.

### Notes:

- Suspensions significantly less turbid than a #3 McFarland standard may result in aberrant reactions.
  - Bacterial suspensions that are **slightly** more turbid than a #3 McFarland standard will not affect test performance and are recommended for stock cultures and quality control strains. However, bacterial suspensions **significantly** more turbid than a #3 McFarland standard may compromise test performance.
  - Thoroughly mix suspensions and vortex if required.
  - Use suspensions within 15 minutes of preparation.
- An agar plate may be inoculated for purity and any additional testing that may be required using a loopful of the test suspension from the inoculation fluid tube. Incubate the plate anaerobically for at least 18-24 hours at 35-37°C.

### Inoculation of RapID ANA II Panels:

- Peel back the lid of the panel over the inoculation port by pulling the tab marked “Peel to Inoculate” up and to the left.
- Using a pipette, gently transfer the **entire** contents of the Inoculation Fluid tube into the upper right-hand corner of the panel. Reseal the inoculation port of the panel by pressing the peel-back tab back in place.
- After adding the test suspension, and while keeping the panel on a level surface, tilt the panel back away from the test cavities at approximately a 45-degree angle (see below).

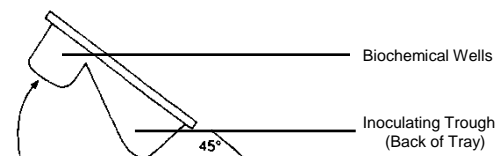

## ENGLISH

- While tilted back, gently rock the panel from side to side to evenly distribute the inoculum along the rear baffles as illustrated below.

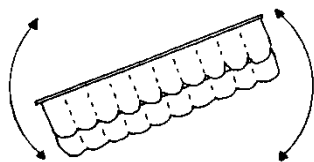

- While maintaining a level, horizontal position (best achieved by using the bench top against the reaction cavity bottoms), slowly tilt the panel forward toward the reaction cavities until the inoculum flows along the baffles into the reaction cavities (see below). This should evacuate all of the inoculum from the rear portion of the panel.

**Note:** If the panel is tilted too quickly, air may be trapped at the test cavity junction, restricting fluid movement.

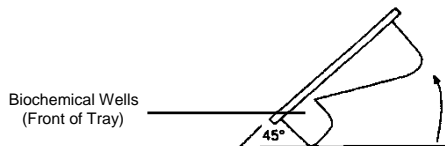

- Return the panel to a level position. If necessary, gently tap the panel on the bench top to remove any air trapped in the cavities.

### Notes:

- Examine the test cavities. Test cavities should appear bubble-free and uniformly filled. Slight irregularities in test cavity fills are acceptable and will not affect test performance. If the panel is grossly misfilled, a new panel should be inoculated and the misfilled panel discarded.
- Complete the inoculation of each panel receiving inoculation fluid before inoculating additional panels.
- Do not allow the inoculum to rest in the back portion of the panel for prolonged periods without completing the procedure.

### Incubation of RapID ANA II Panels:

Incubate inoculated panels at 35-37°C in a non-CO<sub>2</sub> incubator for at least 4 hours but not more than 6 hours. For ease of handling, panels may be incubated in the chipboard incubation trays provided with the kit.

**Note:** If desired, after an incubation period of 4-6 hours and prior to the addition of any reagents, RapID ANA II Panels may be placed in the refrigerator (2-8°C) overnight for reading the next morning.

### Scoring of RapID ANA II Panels:

RapID ANA II panels contain 10 reaction cavities that provide 18 test scores. Test cavities 3 through 10 are bifunctional, containing two separate tests in the same cavity. Bifunctional tests are first scored before the addition of reagent providing the first test result, and then the same cavity is scored again after the addition of reagent to provide the second test result. Bifunctional test cavities 3 through 9, which require RapID ANA II Reagent, are indicated with the first test above the bar and the second test below the bar. Bifunctional test 10, which uses RapID Spot Indole Reagent, is designated with a box drawn around the reagent-requiring test.

### RapID ANA II Panel Test Location

| Cavity #  | 1   | 2    | 3                   | 4           | 5                   | 6                  | 7                   | 8                   | 9          | 10                     |
|-----------|-----|------|---------------------|-------------|---------------------|--------------------|---------------------|---------------------|------------|------------------------|
| Test Code | URE | BLTS | $\alpha$ ARA<br>LGY | ONPG<br>GLY | $\alpha$ GLU<br>PRO | $\beta$ GLU<br>PAL | $\alpha$ GAL<br>ARG | $\alpha$ FUC<br>SER | NAG<br>PYR | PO <sub>4</sub><br>IND |

- While firmly holding the RapID ANA II panel on the benchtop, peel off the label lid over the reaction cavities by pulling the lower right hand tab up and to the left.
- Without the addition of any reagents, read and score cavities 1 (URE) through 10 (PO<sub>4</sub>) from left to right using the interpretation guide presented in Table 2. Record test scores in the appropriate boxes on the report form using the test code above the bar for bifunctional tests.
- Add 2 drops of RapID Spot Indole Reagent to cavity 10 (IND).  
**Note:** Only RapID Spot Indole Reagent should be used. Kovacs' or Ehrlich's Indole reagent will not provide satisfactory results.
- Add 2 drops of RapID ANA II Reagent to cavities 3 (LGY) through 9 (PYR).
- Allow at least 30 seconds but no more than 2 minutes for color development. Read and score cavities 3 through 10. Record the scores in the appropriate boxes of the report form using the test codes below the bar for bifunctional tests.
- Reference the microcode obtained on the report form in ERIC for the identification.

**Table 2. Interpretation of RapID ANA II System Tests\***

| Cavity #                        | Test Code       | Reagent              | Reaction                          |                                 | Comments                                                                    |                           |                    |                 |                                                                                           |
|---------------------------------|-----------------|----------------------|-----------------------------------|---------------------------------|-----------------------------------------------------------------------------|---------------------------|--------------------|-----------------|-------------------------------------------------------------------------------------------|
|                                 |                 |                      | Positive                          | Negative                        |                                                                             |                           |                    |                 |                                                                                           |
| <b>Before Reagent Addition:</b> |                 |                      |                                   |                                 |                                                                             |                           |                    |                 |                                                                                           |
| 1                               | URE             | None                 | Red or purple                     | Yellow to orange                | Shades of orange or reddish-orange should be scored as negative.            |                           |                    |                 |                                                                                           |
| 2                               | BLTS            |                      |                                   |                                 |                                                                             |                           |                    |                 |                                                                                           |
| 3                               | $\alpha$ ARA    |                      |                                   |                                 |                                                                             |                           |                    |                 |                                                                                           |
| 4                               | ONPG            |                      |                                   |                                 |                                                                             |                           |                    |                 |                                                                                           |
| 5                               | $\alpha$ GLU    | None                 | Medium or bright yellow           | Clear, tan, or very pale yellow | Only the development of a distinct yellow color is a positive test.         |                           |                    |                 |                                                                                           |
| 6                               | $\beta$ GLU     |                      |                                   |                                 |                                                                             |                           |                    |                 |                                                                                           |
| 7                               | $\alpha$ GAL    |                      |                                   |                                 |                                                                             |                           |                    |                 |                                                                                           |
| 8                               | $\alpha$ FUC    |                      |                                   |                                 |                                                                             |                           |                    |                 |                                                                                           |
| 9                               | NAG             |                      |                                   |                                 |                                                                             |                           |                    |                 |                                                                                           |
| 10                              | PO <sub>4</sub> |                      |                                   |                                 |                                                                             |                           |                    |                 |                                                                                           |
| <b>After Reagent Addition:</b>  |                 |                      |                                   |                                 |                                                                             |                           |                    |                 |                                                                                           |
| 3                               | LGY             | RapID ANA II Reagent | Purple, violet, red, or dark pink | Yellow, orange or pale pink     | Allow at least 30 seconds but no more than 2 minutes for color development. |                           |                    |                 |                                                                                           |
| 4                               | GLY             |                      |                                   |                                 |                                                                             |                           |                    |                 |                                                                                           |
| 5                               | PRO             |                      |                                   |                                 |                                                                             |                           |                    |                 |                                                                                           |
| 6                               | PAL             |                      |                                   |                                 |                                                                             |                           |                    |                 |                                                                                           |
| 7                               | ARG             |                      |                                   |                                 |                                                                             |                           |                    |                 |                                                                                           |
| 8                               | SER             |                      |                                   |                                 |                                                                             |                           |                    |                 |                                                                                           |
| 9                               | PYR             |                      |                                   |                                 |                                                                             |                           |                    |                 |                                                                                           |
| 10                              | IND             |                      |                                   |                                 |                                                                             | RapID Spot Indole Reagent | Blue or blue-green | Any other color | Any shade of blue or blue-green should be scored as positive without regard to intensity. |

\*NOTE: Panels should be read by looking down through the reaction wells against a white background.

### RESULTS AND RANGE OF EXPECTED VALUES

The RapID ANA II Differential Charts illustrate the expected results for the RapID ANA II System. Differential Chart results are expressed as a series of positive percentages for each system test. This information statistically supports the use of each test and provides the basis, through numerical coding of digital test results, for a probabilistic approach to the identification of the test isolate.

Identifications are made using individual test scores from RapID ANA II panels in conjunction with other laboratory information (e.g., Gram stain, aerotolerance, growth on differential or selective media, etc.) to produce a pattern that statistically resembles known reactivity for taxa recorded in the RapID System database. These patterns are compared through the

## ENGLISH

use of the RapID ANA II Differential Charts, or by derivation of a microcode and the use of ERIC.

### QUALITY CONTROL

All lot numbers of RapID ANA II System have been tested using the following quality control organisms and have been found to be acceptable. Testing of control organisms should be performed in accordance with established laboratory quality control procedures. If aberrant quality control results are noted, patient results should not be reported. Table 3 lists expected results for the selected battery of test organisms.

#### Notes:

- The quality control of RapID Reagents is accomplished by obtaining the expected reactions for tests requiring the addition of the reagents (cavities 3-10).

- Organisms which have been repeatedly transferred on agar media for prolonged periods may provide aberrant results.
- Quality control strains should be stored frozen or lyophilized. Prior to use, quality control strains should be transferred 2-3 times from storage on an agar medium that is recommended for use with the RapID ANA II System.
- Formulations, additives, and ingredients of culture media vary from manufacturer to manufacturer and may vary from batch to batch. As a result, culture media may influence constitutive enzymatic activity of designated quality control strains. If quality control strain results differ from the patterns indicated, a subculture onto medium from a different batch or from another manufacturer will often resolve quality control discrepancies.

**Table 3. Quality Control Chart for RapID ANA II Panels**

| Organism                                                     | Before Reagent Addition |      |      |      |      |      |      |      |     |                 | After RapID ANA II Reagent Addition |     |     |     |     |     |     | Spot Indole |
|--------------------------------------------------------------|-------------------------|------|------|------|------|------|------|------|-----|-----------------|-------------------------------------|-----|-----|-----|-----|-----|-----|-------------|
|                                                              | URE                     | BLTS | αARA | ONPG | αGLU | βGLU | αGAL | αFUC | NAG | PO <sub>4</sub> | LGY                                 | GLY | PRO | PAL | ARG | SER | PYR |             |
| <i>Clostridium sordellii</i> <sup>a</sup><br>ATCC® 9714      | +                       | -    | -    | -    | -    | -    | -    | V    | -   | -               | -                                   | V   | +   | V   | V   | V   | V   | +           |
| <i>Parabacteroides distasonis</i> <sup>a</sup><br>ATCC® 8503 | -                       | +    | V    | +    | +    | +    | +    | -    | +   | +               | +                                   | -   | +   | +   | +   | +   | +   | -           |
| <i>Bacteroides uniformis</i><br>ATCC® 8492                   | -                       | +    | +    | +    | +    | +    | +    | +    | +   | +               | +                                   | +   | -   | -   | -   | -   | -   | +           |

+, positive; -, negative; V, variable

<sup>a</sup>Key indicator strains demonstrate acceptable performance of the most labile substrate in the system and reactivity in a significant number of wells, according to Clinical and Laboratory Standards Institute recommendations for streamlined quality control.<sup>36</sup>

### RapID ANA II Differential Chart: Cocci

| Organism                                           | URE | BLTS | αARA | ONPG | αGLU | βGLU | αGAL | αFUC | NAG | PO <sub>4</sub> | LGY | GLY | PRO | PAL | ARG | SER | PYR | IND |
|----------------------------------------------------|-----|------|------|------|------|------|------|------|-----|-----------------|-----|-----|-----|-----|-----|-----|-----|-----|
| <i>Anaerococcus hydrogenalis</i> <sup>a</sup>      | 0   | 0    | 0    | 0    | 98   | 0    | 0    | 0    | 0   | 2               | 9   | 14  | 2   | 1   | 65  | 2   | 96  | 99  |
| <i>Anaerococcus prevotii</i> <sup>b</sup>          | 2   | 0    | 0    | 0    | 9    | 1    | 0    | 0    | 0   | 9               | 11  | 21  | 11  | 16  | 96  | 68  | 2   | 0   |
| <i>Anaerococcus tetradius</i> <sup>c</sup>         | 88  | 5    | 0    | 12   | 88   | 16   | 5    | 0    | 0   | 0               | 33  | 96  | 0   | 88  | 97  | 90  | 61  | 0   |
| <i>Blautia producta</i> <sup>d</sup>               | 0   | 51   | 0    | 99   | 99   | 96   | 56   | 0    | 52  | 0               | 0   | 2   | 0   | 2   | 9   | 6   | 0   | 0   |
| <i>Fingoldia magna</i> <sup>e</sup>                | 0   | 0    | 0    | 0    | 2    | 0    | 0    | 0    | 2   | 6               | 95  | 96  | 2   | 82  | 98  | 95  | 98  | 0   |
| <i>Gemella morbillorum</i> <sup>f</sup>            | 0   | 0    | 0    | 18   | 80   | 1    | 0    | 0    | 0   | 68              | 71  | 73  | 88  | 93  | 99  | 98  | 4   | 0   |
| <i>Micromonas micros</i> <sup>g</sup>              | 0   | 0    | 0    | 0    | 4    | 0    | 0    | 0    | 5   | 93              | 95  | 98  | 92  | 88  | 98  | 96  | 86  | 0   |
| <i>Peptoniphilus asaccharolyticus</i> <sup>h</sup> | 0   | 0    | 0    | 0    | 3    | 1    | 0    | 0    | 0   | 4               | 11  | 22  | 5   | 20  | 96  | 21  | 8   | 99  |
| <i>Peptoniphilus indolicus</i> <sup>i</sup>        | 0   | 2    | 0    | 0    | 0    | 0    | 0    | 0    | 0   | 99              | 28  | 76  | 0   | 81  | 91  | 98  | 0   | 99  |
| <i>Peptostreptococcus anaerobius</i>               | 0   | 0    | 0    | 0    | 96   | 0    | 0    | 0    | 2   | 0               | 0   | 8   | 92  | 16  | 68  | 18  | 0   | 0   |
| <i>Staphylococcus saccharolyticus</i>              | 21  | 0    | 0    | 0    | 0    | 0    | 0    | 0    | 0   | 18              | 0   | 0   | 0   | 0   | 0   | 0   | 0   | 0   |
| <i>Streptococcus constellatus</i>                  | 0   | 0    | 0    | 0    | 46   | 91   | 18   | 0    | 12  | 94              | 82  | 97  | 6   | 98  | 99  | 93  | 6   | 0   |
| <i>Streptococcus intermedius</i>                   | 0   | 29   | 9    | 99   | 92   | 95   | 8    | 0    | 21  | 92              | 92  | 98  | 78  | 98  | 99  | 96  | 5   | 0   |
| <i>Veillonella</i> spp. <sup>j</sup>               | 0   | 0    | 0    | 0    | 4    | 0    | 0    | 0    | 0   | 59              | 2   | 9   | 1   | 5   | 38  | 16  | 83  | 0   |

<sup>a</sup>Previously designated as *Peptostreptococcus hydrogenalis*

<sup>b</sup>Previously designated as *Peptostreptococcus prevotii*.

<sup>c</sup>Previously designated as *Peptostreptococcus tetradius*.

<sup>d</sup>Previously designated as *Peptostreptococcus productus*.

<sup>e</sup>Previously designated as *Peptostreptococcus magnus*

<sup>f</sup>Previously designated as *Streptococcus morbillorum*.

<sup>g</sup>Previously designated as *Peptostreptococcus micros*.

<sup>h</sup>Previously designated as *Peptostreptococcus asaccharolyticus*.

<sup>i</sup>Previously designated as *Peptostreptococcus indolicus*.

<sup>j</sup>Consists of three species from human clinical specimens: *V. parvula*, *V. dispar*, and *V. atypica*.

### LIMITATIONS

- The use of RapID ANA II System and the interpretation of results requires the knowledge of a competent laboratorian who is trained in general microbiological methods and who judiciously makes use of training, experience, specimen information, and other pertinent procedures before reporting the identification obtained using RapID ANA II System.
- Specimen source, aerotolerance, Gram stain characteristics, and growth on selective agars should be considered when using RapID ANA II System.
- RapID ANA II System must be used with pure cultures of test organisms. The use of mixed microbial populations or direct testing of clinical material without culture will result in aberrant results.
- RapID ANA II System is designed for use with the taxa listed in the RapID ANA II Differential Charts. The use of organisms not specifically listed may lead to misidentifications.
- Expected values listed for RapID ANA II System tests may differ from conventional test results or previously reported information.
- The accuracy of RapID ANA II System is based upon the statistical use of a multiplicity of specially designed tests and an exclusive, proprietary database. The use of any single test found in RapID ANA II System to establish the identification of a test isolate is subject to the error inherent in that test alone.

### PERFORMANCE CHARACTERISTICS

The RapID ANA II System performance characteristics have been established by laboratory testing of reference and stock cultures.<sup>5,10,21-35</sup>

### BIBLIOGRAPHY

- Blazevic, D.J. and G.M. Ederer. 1975. Principles of Biochemical Tests in Diagnostic Microbiology. John Wiley & Sons, New York, NY.
- Dowell, V.R., Jr. and T.M. Hawkins. 1977. Laboratory Methods in Anaerobic Bacteriology, CDC Laboratory Manual. U.S. Dept. of H.H.S. CDC, Atlanta, GA.
- Holdeman, L.V., E.P. Cato, and W.E.C. Moore. 1977. Anaerobe Laboratory Manual. 4<sup>th</sup> ed. Virginia Polytechnic Institute and State University, Blacksburg, VA.
- Barnes, E.H. and J.F. Morris. 1957. J. Bacteriol. 73:100-104.
- Dellinger, C.A. and L.V. Moore. 1986. J. Clin. Microbiol. 23:289-293.
- Guilbault, G.G. 1970. Enzymatic Methods of Analysis. p. 43-51. Pergamon Press, New York, NY.
- Kilian, M. and P. Bulow. 1976. Acta. Pathol. Microbiol. Scand. B. 84:245-251.
- Tharagannet, D., P.R. Sisson, C.M. Roxby, H.R. Ingham, and J.B. Selkon. 1977. J. Clin. Pathol. 30:505-509.
- Bodansky, O. and A.L. Latner. 1975. Advances in Clinical Chemistry. Vol. 17, p. 53-61. Academic Press, New York, NY.
- Celigi, D.M. and P.C. Schreckenberger. 1991. J. Clin. Microbiol. 29:457-462.
- Nagatsu, T., M. Hino, H. Fuyamada, T. Hayakawa, S. Sakakibara, Y. Nakagawa, and T. Takemoto. 1976. Anal. Biochem. 74:466-476.
- Norris, J.R. and D.W. Ribbons. 1976. Methods in Microbiology. Vol. 9, p. 1-14. Academic Press, New York, NY.
- Peterson, E.H. and E.J. Hsu. 1978. J. Food Sci. 43:1853-1856.
- Westley, J.R., P.J. Anderson, V.A. Close, B. Halpern, and E.M. Lederberg. 1967. Appl. Microbiol. 15:822-825.
- Fay, G.D. and A.L. Barry. 1974. Appl. Microbiol. 15:822-825.
- Sutter, V.L. and W.T. Carter. 1972. J. Clin. Pathol. 58:335-339.
- Holdeman, L.V., E.P. Cato, and W.E.C. Moore. 1987. Anaerobe Laboratory Manual Update. Supplement to the 4<sup>th</sup> ed. Virginia Polytechnic Institute and State University, Blacksburg, VA.
- Summanen, P., E.J. Baron, D.M. Citron, C.A. Strong, H.M. Wexler, and S.M. Finegold. 1993. Wadsworth Anaerobic Bacteriology Manual. 5<sup>th</sup> ed. Star Publishing Company, Belmont, CA.

**ENGLISH**

19. Murray, P.R., E.J. Baron, J.H. Jorgensen, M.L. Landry, and M.A. Pfaller. 2007. Manual of Clinical Microbiology. 9<sup>th</sup> ed. ASM Press, Washington, D.C.
20. Forbes, B.A., D.F. Sahn, and A.S. Weisfeld. 2007. Bailey and Scott's Diagnostic Microbiology. 12<sup>th</sup> ed. Mosby Elsevier, St. Louis, MO.
21. Alexander, C.J., D.M. Citron, S. Hunt Gerardo, M.C. Claros, D. Talan, and E.J. Goldstein. 1997. J. Clin. Microbiol. 35:406-411.
22. Appelbaum, P.C., C.S. Kaufman, J.C. Keifer, and J.J. Venbrux. 1984. J. Clin. Microbiol. 18:615-621.
23. Appelbaum, P.C., J.W. Deppenbusch, and C.S. Kaufman. 1984. Abstract C-153. Abstracts of the 84<sup>th</sup> General Meeting of the American Society for Microbiology. ASM, Washington, D.C.
24. Burdash, N.M., K.A. Corey, P.J. Fortuna, M.L. Beasley, E.R. Bannister, and J.P. Manos. 1984. Abstract C-150. Abstracts of the 84<sup>th</sup> General Meeting of the American Society for Microbiology. ASM, Washington, D.C.
25. Hamilton, L.T., C. Ayer, and D.N Wright. 1985. Abstract C-159. Abstracts of the 85<sup>th</sup> General Meeting of the American Society for Microbiology. ASM, Washington, D.C.
26. Hansen, S.L. and W.A. Pope. 1984. Abstract C-147. Abstracts of the 84<sup>th</sup> General Meeting of the American Society for Microbiology. ASM, Washington, D.C.
27. Hudspeth, M.K., S. Hunt Gerardo, M.F Maiden, D.M. Citron, and E.J. Goldstein. 1999. J. Clin. Microbiol. 37:2003-2006.
28. Kaplan, R.L., M.J. O'Brian, and W. Landua. 1985. Abstract C-163. Abstracts of the 85<sup>th</sup> General Meeting of the American Society for Microbiology. ASM, Washington, D.C.
29. Karachewski, N.O., E.L. Busch, and C.L. Wells. 1984. Abstract C-148. Abstracts of the 84<sup>th</sup> General Meeting of the American Society for Microbiology. ASM, Washington, D.C.
30. Mangels, J., D. Berkley, and S. Wood. 1984. Abstract C-152. Abstracts of the 84<sup>th</sup> General Meeting of the American Society for Microbiology. ASM, Washington, D.C.
31. Marler, L.M., J.A. Sider, L.C. Wolters, Y. Pettigrew, B.L. Skitt, and S.D. Allen. 1991. J. Clin. Microbiol. 29:874-878.
32. Morgenstern, F. 1984. Abstract C-154. Abstracts of the 84<sup>th</sup> General Meeting of the American Society for Microbiology. ASM, Washington, D.C.
33. Niles, A.C. and P.R. Murray. 1985. Abstract C-161. Abstracts of the 85<sup>th</sup> General Meeting of the American Society for Microbiology. ASM, Washington, D.C.
34. Ristow K.L., P.C. Schreckenberger, D.M. Celig, M.A. Ulanday, and L.J. LeBeau. 1984. Abstract C-151. Abstracts of the 84<sup>th</sup> General Meeting of the American Society for Microbiology. ASM, Washington, D.C.
35. Syed, S., W.J. Loesche, and C. Pearson. 1984. Abstract C-155. Abstracts of the 84<sup>th</sup> General Meeting of the American Society for Microbiology. ASM, Washington, D.C.
36. Clinical and Laboratory Standards Institute. 2008. Quality Control for Commercial Microbial Identification Systems; Approved Guideline. M50-A. CLSI, Wayne, PA.

**PACKAGING**

REF R8311002, RapID ANA II System ..... 20 Tests/Kit

**Symbol Legend**

|                                                                                   |                                        |
|-----------------------------------------------------------------------------------|----------------------------------------|
|  | Contains sufficient for < n > tests    |
| <b>REF</b>                                                                        | Catalog Number                         |
| <b>IVD</b>                                                                        | In Vitro Diagnostic Medical Device     |
| <b>LAB</b>                                                                        | For Laboratory Use                     |
|  | Consult Instructions for Use (IFU)     |
|  | Temperature Limitation (Storage Temp.) |
| <b>LOT</b>                                                                        | Batch Code (Lot Number)                |
|  | Use By (Expiration Date)               |
| <b>EC REP</b>                                                                     | Authorized European Representative     |
|  | Manufacturer                           |

RapID™ is a trademark of Thermo Fisher Scientific and its subsidiaries.  
 ERIC™ is a trademark of Thermo Fisher Scientific and its subsidiaries.  
 ATCC® is a registered trademark of American Type Culture Collection.

|                                                                                   |                                                                                                                                                   |
|-----------------------------------------------------------------------------------|---------------------------------------------------------------------------------------------------------------------------------------------------|
|  | 12076 Santa Fe Drive<br>Lenexa, KS 66215, USA<br><a href="http://www.remel.com">www.remel.com</a> (800) 255-6730<br>International: (913) 888-0939 |
| <b>EC REP</b>                                                                     | Remel Europe Ltd.<br>Clipper Boulevard West, Crossways<br>Dartford, Kent, DA2 6PT, UK                                                             |

For technical information contact your local distributor.  
 IFU 8311002, Revised June 01, 2017

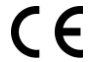

Printed in U.S.A.

RapID ANA II Differential Chart: Gram-Negative Bacilli

| Organism                                            | URE | BLTS | αARA | ONPG | αGLU | βGLU | αGAL | αFUC | NAG | PO <sub>4</sub> | LGY | GLY | PRO | PAL | ARG | SER | PYR | IND |
|-----------------------------------------------------|-----|------|------|------|------|------|------|------|-----|-----------------|-----|-----|-----|-----|-----|-----|-----|-----|
| <i>Bacteroides caccae</i>                           | 0   | 79   | 98   | 99   | 88   | 96   | 99   | 97   | 99  | 99              | 96  | 91  | 5   | 75  | 98  | 72  | 0   | 0   |
| <i>Bacteroides eggerthii</i>                        | 0   | 39   | 77   | 93   | 99   | 98   | 42   | 0    | 99  | 98              | 97  | 13  | 0   | 0   | 32  | 5   | 0   | 99  |
| <i>Bacteroides fragilis</i>                         | 0   | 89   | 3    | 94   | 98   | 97   | 98   | 98   | 98  | 98              | 98  | 81  | 1   | 79  | 98  | 81  | 74  | 0   |
| <i>Bacteroides ovatus</i>                           | 0   | 95   | 96   | 88   | 98   | 95   | 98   | 93   | 99  | 98              | 96  | 84  | 0   | 0   | 3   | 2   | 0   | 99  |
| <i>Bacteroides stercoris</i>                        | 0   | 45   | 9    | 22   | 99   | 31   | 0    | 70   | 99  | 99              | 98  | 9   | 0   | 0   | 2   | 4   | 0   | 98  |
| <i>Bacteroides pyogenes</i> <sup>a</sup>            | 0   | 9    | 0    | 92   | 99   | 49   | 2    | 93   | 99  | 99              | 99  | 9   | 0   | 13  | 70  | 22  | 0   | 0   |
| <i>Bacteroides thetaiotaomicron</i>                 | 0   | 92   | 91   | 96   | 98   | 96   | 98   | 98   | 98  | 94              | 98  | 67  | 1   | 49  | 98  | 77  | 3   | 99  |
| <i>Bacteroides uniformis</i>                        | 0   | 93   | 81   | 98   | 99   | 97   | 92   | 93   | 99  | 98              | 98  | 6   | 0   | 2   | 3   | 0   | 0   | 99  |
| <i>Bacteroides vulgatus</i>                         | 0   | 3    | 85   | 95   | 99   | 0    | 99   | 99   | 99  | 95              | 98  | 82  | 4   | 1   | 85  | 52  | 84  | 0   |
| <i>Bilophila wadsworthia</i>                        | 91  | 0    | 0    | 0    | 0    | 0    | 0    | 0    | 0   | 2               | 0   | 2   | 0   | 0   | 95  | 1   | 0   | 0   |
| <i>Campylobacter gracilis</i> <sup>b</sup>          | 0   | 0    | 0    | 0    | 0    | 0    | 0    | 0    | 0   | 0               | 0   | 6   | 0   | 0   | 93  | 5   | 0   | 0   |
| <i>Campylobacter ureolyticus</i> <sup>c</sup>       | 99  | 0    | 0    | 0    | 0    | 0    | 0    | 0    | 0   | 0               | 16  | 8   | 5   | 2   | 82  | 6   | 3   | 0   |
| <i>Capnocytophaga</i> spp.                          | 0   | 42   | 0    | 89   | 96   | 86   | 2    | 1    | 78  | 76              | 99  | 99  | 90  | 99  | 99  | 95  | 13  | 0   |
| <i>Fusobacterium mortiferum</i>                     | 0   | 12   | 0    | 62   | 2    | 70   | 92   | 0    | 0   | 92              | 28  | 42  | 0   | 60  | 96  | 86  | 91  | 0   |
| <i>Fusobacterium necrophorum</i>                    | 0   | 0    | 0    | 0    | 0    | 0    | 0    | 0    | 0   | 38              | 0   | 0   | 0   | 0   | 15  | 2   | 0   | 99  |
| <i>Fusobacterium nucleatum</i>                      | 0   | 0    | 0    | 0    | 0    | 0    | 0    | 0    | 0   | 2               | 0   | 0   | 0   | 0   | 45  | 0   | 36  | 99  |
| <i>Fusobacterium varium</i>                         | 0   | 4    | 0    | 0    | 0    | 0    | 8    | 0    | 2   | 0               | 16  | 72  | 2   | 41  | 98  | 88  | 99  | 60  |
| <i>Odoribacter splanchnicus</i> <sup>d</sup>        | 0   | 8    | 4    | 95   | 0    | 8    | 93   | 92   | 99  | 73              | 91  | 14  | 9   | 34  | 99  | 84  | 99  | 99  |
| <i>Parabacteroides distasonis</i> <sup>e</sup>      | 0   | 90   | 67   | 96   | 99   | 91   | 96   | 0    | 99  | 94              | 96  | 94  | 0   | 70  | 98  | 98  | 91  | 0   |
| <i>Parabacteroides merdae</i> <sup>f</sup>          | 0   | 20   | 12   | 99   | 38   | 29   | 99   | 0    | 98  | 22              | 98  | 99  | 0   | 14  | 99  | 25  | 2   | 0   |
| <i>Porphyromonas asaccharolytica</i>                | 0   | 2    | 0    | 0    | 0    | 0    | 0    | 94   | 0   | 96              | 92  | 22  | 0   | 14  | 60  | 45  | 0   | 99  |
| <i>Porphyromonas endodontalis</i>                   | 0   | 0    | 0    | 0    | 0    | 0    | 0    | 0    | 29  | 95              | 98  | 0   | 0   | 0   | 5   | 2   | 0   | 99  |
| <i>Porphyromonas gingivalis</i>                     | 0   | 2    | 0    | 2    | 0    | 0    | 0    | 0    | 99  | 95              | 96  | 19  | 0   | 5   | 93  | 27  | 27  | 99  |
| <i>Prevotella bivia</i>                             | 0   | 2    | 0    | 97   | 99   | 0    | 0    | 91   | 99  | 98              | 98  | 95  | 2   | 4   | 75  | 24  | 0   | 0   |
| <i>Prevotella buccae</i>                            | 0   | 71   | 31   | 91   | 99   | 94   | 99   | 0    | 1   | 99              | 97  | 10  | 0   | 5   | 6   | 0   | 0   | 0   |
| <i>Prevotella buccalis/veroralis</i>                | 0   | 0    | 0    | 99   | 99   | 6    | 99   | 8    | 95  | 99              | 99  | 98  | 0   | 0   | 0   | 0   | 0   | 0   |
| <i>Prevotella corporis</i>                          | 0   | 0    | 0    | 0    | 98   | 0    | 0    | 29   | 0   | 98              | 96  | 0   | 0   | 0   | 98  | 14  | 6   | 0   |
| <i>Prevotella denticola</i>                         | 0   | 0    | 0    | 99   | 99   | 0    | 91   | 99   | 99  | 99              | 99  | 7   | 0   | 0   | 0   | 0   | 0   | 0   |
| <i>Prevotella disiens</i>                           | 0   | 2    | 0    | 0    | 99   | 0    | 7    | 0    | 0   | 99              | 98  | 90  | 0   | 2   | 90  | 29  | 0   | 0   |
| <i>Prevotella intermedia</i>                        | 0   | 0    | 0    | 0    | 99   | 0    | 0    | 93   | 0   | 98              | 98  | 4   | 0   | 0   | 96  | 6   | 0   | 99  |
| <i>Prevotella loescheii</i>                         | 0   | 0    | 0    | 97   | 98   | 79   | 81   | 80   | 99  | 99              | 99  | 9   | 0   | 1   | 4   | 2   | 0   | 0   |
| <i>Prevotella melaninogenica</i>                    | 0   | 1    | 16   | 98   | 92   | 0    | 90   | 92   | 99  | 98              | 99  | 5   | 0   | 0   | 98  | 2   | 0   | 0   |
| <i>Prevotella oralis</i> Group                      | 0   | 92   | 0    | 92   | 96   | 89   | 91   | 78   | 96  | 98              | 98  | 90  | 0   | 0   | 5   | 2   | 0   | 0   |
| <i>Prevotella oris</i>                              | 0   | 98   | 99   | 88   | 99   | 89   | 78   | 98   | 99  | 99              | 98  | 11  | 0   | 0   | 2   | 0   | 0   | 0   |
| <i>Pseudoflavonifractor capillosus</i> <sup>g</sup> | 0   | 87   | 9    | 95   | 30   | 92   | 0    | 98   | 99  | 96              | 90  | 36  | 0   | 0   | 2   | 5   | 0   | 0   |
| <i>Tannerella forsythia</i> <sup>h</sup>            | 0   | 78   | 0    | 95   | 99   | 50   | 0    | 99   | 99  | 99              | 98  | 12  | 0   | 31  | 99  | 81  | 0   | 98  |
| <i>Wolinella</i> spp.                               | 0   | 0    | 0    | 0    | 0    | 5    | 0    | 0    | 0   | 5               | 0   | 0   | 0   | 0   | 88  | 0   | 0   | 0   |

Gram-Variable Bacilli:

|                                    |   |    |    |    |    |    |    |    |    |    |    |    |    |    |    |   |   |   |
|------------------------------------|---|----|----|----|----|----|----|----|----|----|----|----|----|----|----|---|---|---|
| <i>Clostridium clostridioforme</i> | 0 | 84 | 90 | 84 | 85 | 87 | 98 | 0  | 81 | 2  | 93 | 9  | 1  | 13 | 47 | 2 | 7 | 6 |
| <i>Clostridium ramosum</i>         | 0 | 90 | 0  | 84 | 99 | 99 | 76 | 0  | 99 | 0  | 29 | 2  | 0  | 0  | 33 | 0 | 0 | 0 |
| <i>Mobiluncus curtisii</i>         | 0 | 26 | 2  | 31 | 99 | 5  | 95 | 15 | 0  | 5  | 28 | 32 | 99 | 86 | 90 | 5 | 0 | 0 |
| <i>Mobiluncus mulieris</i>         | 0 | 26 | 2  | 31 | 99 | 5  | 0  | 15 | 0  | 5  | 28 | 32 | 99 | 86 | 90 | 5 | 0 | 0 |
| <i>Tissierella praeacuta</i>       | 0 | 0  | 0  | 0  | 0  | 0  | 0  | 0  | 0  | 85 | 88 | 26 | 0  | 0  | 92 | 0 | 0 | 0 |

<sup>a</sup>Previously designated as *Bacteroides tectum*.

<sup>b</sup>Previously designated as *Bacteroides gracilis*.

<sup>c</sup>Previously designated as *Bacteroides ureolyticus*.

<sup>d</sup>Previously designated as *Bacteroides splanchnicus*.

<sup>e</sup>Previously designated as *Bacteroides distasonis*.

<sup>f</sup>Previously designated as *Bacteroides merdae*.

<sup>g</sup>Previously designated as *Bacteroides capillosus*.

<sup>h</sup>Previously designated as *Bacteroides forsythus*.

## RAPID ANA II Differential Chart: Gram-Positive Bacilli

| Organism                                          | URE | BLTS | $\alpha$ ARA | ONPG | $\alpha$ GLU | $\beta$ GLU | $\alpha$ GAL | $\alpha$ FUC | NAG | PO <sub>4</sub> | LGY | GLY | PRO | PAL | ARG | SER | PYR | IND |
|---------------------------------------------------|-----|------|--------------|------|--------------|-------------|--------------|--------------|-----|-----------------|-----|-----|-----|-----|-----|-----|-----|-----|
| <i>Actinomyces bovis</i>                          | 0   | 0    | 0            | 0    | 0            | 12          | 0            | 0            | 99  | 0               | 99  | 99  | 99  | 86  | 99  | 99  | 0   | 0   |
| <i>Actinomyces israelii</i>                       | 0   | 29   | 61           | 87   | 99           | 97          | 93           | 0            | 2   | 2               | 86  | 92  | 99  | 98  | 98  | 64  | 19  | 0   |
| <i>Actinomyces meyeri</i>                         | 0   | 2    | 0            | 69   | 93           | 0           | 0            | 0            | 79  | 0               | 92  | 98  | 99  | 78  | 98  | 96  | 38  | 0   |
| <i>Actinomyces naeslundii</i>                     | 90  | 15   | 0            | 96   | 86           | 96          | 93           | 0            | 0   | 15              | 57  | 80  | 97  | 87  | 65  | 10  | 0   | 0   |
| <i>Actinomyces odontolyticus</i>                  | 0   | 4    | 15           | 86   | 96           | 46          | 5            | 92           | 5   | 20              | 92  | 98  | 99  | 82  | 98  | 98  | 0   | 0   |
| <i>Actinomyces turicensis</i>                     | 0   | 0    | 0            | 0    | 99           | 0           | 0            | 28           | 0   | 0               | 88  | 91  | 96  | 90  | 99  | 96  | 0   | 0   |
| <i>Actinomyces viscosus</i>                       | 81  | 76   | 0            | 91   | 99           | 92          | 62           | 0            | 0   | 0               | 76  | 98  | 99  | 86  | 92  | 33  | 0   | 0   |
| <i>Arcanobacterium pyogenes</i> <sup>a</sup>      | 0   | 12   | 15           | 86   | 0            | 0           | 0            | 0            | 99  | 75              | 93  | 96  | 96  | 86  | 98  | 96  | 2   | 0   |
| <i>Atopobium minutum</i> <sup>b</sup>             | 0   | 0    | 0            | 0    | 0            | 26          | 99           | 0            | 0   | 0               | 0   | 12  | 0   | 0   | 98  | 33  | 0   | 0   |
| <i>Bifidobacterium</i> spp.                       | 0   | 79   | 87           | 90   | 99           | 87          | 92           | 0            | 2   | 2               | 11  | 74  | 93  | 95  | 98  | 93  | 0   | 0   |
| <i>Clostridium baratii</i>                        | 0   | 88   | 0            | 87   | 16           | 76          | 93           | 0            | 96  | 0               | 0   | 0   | 0   | 0   | 82  | 0   | 97  | 0   |
| <i>Clostridium beijerinckii</i>                   | 0   | 42   | 0            | 51   | 99           | 98          | 79           | 0            | 0   | 0               | 0   | 0   | 0   | 0   | 0   | 0   | 0   | 0   |
| <i>Clostridium bifermentans</i>                   | 0   | 0    | 0            | 0    | 2            | 0           | 0            | 2            | 68  | 4               | 0   | 5   | 99  | 38  | 86  | 88  | 3   | 94  |
| <i>Clostridium botulinum</i> F                    | 0   | 0    | 0            | 0    | 82           | 26          | 0            | 0            | 0   | 0               | 0   | 0   | 99  | 98  | 98  | 98  | 0   | 0   |
| <i>Clostridium botulinum</i> I <sup>c</sup>       | 0   | 0    | 0            | 0    | 99           | 0           | 0            | 0            | 60  | 9               | 0   | 0   | 0   | 0   | 0   | 0   | 0   | 0   |
| <i>Clostridium butyricum</i>                      | 0   | 9    | 85           | 91   | 98           | 0           | 99           | 2            | 0   | 0               | 0   | 0   | 3   | 0   | 9   | 6   | 0   | 0   |
| <i>Clostridium cadaveris</i>                      | 0   | 0    | 0            | 0    | 0            | 0           | 0            | 94           | 99  | 0               | 2   | 7   | 0   | 7   | 87  | 9   | 98  | 99  |
| <i>Clostridium clostridioforme</i>                | 0   | 84   | 90           | 84   | 85           | 87          | 98           | 0            | 81  | 2               | 93  | 9   | 1   | 13  | 47  | 2   | 7   | 6   |
| <i>Clostridium difficile</i>                      | 0   | 2    | 0            | 2    | 8            | 3           | 0            | 0            | 0   | 9               | 2   | 0   | 99  | 43  | 48  | 16  | 6   | 0   |
| <i>Clostridium glycolicum</i>                     | 0   | 0    | 0            | 10   | 0            | 16          | 0            | 0            | 9   | 99              | 0   | 2   | 99  | 0   | 35  | 9   | 46  | 0   |
| <i>Clostridium hastiforme</i>                     | 0   | 0    | 1            | 0    | 0            | 0           | 0            | 0            | 5   | 2               | 88  | 62  | 92  | 72  | 95  | 98  | 0   | 0   |
| <i>Clostridium histolyticum</i>                   | 0   | 0    | 0            | 9    | 0            | 0           | 0            | 0            | 0   | 0               | 3   | 9   | 0   | 98  | 96  | 91  | 98  | 0   |
| <i>Clostridium innocuum</i>                       | 0   | 5    | 0            | 0    | 20           | 36          | 5            | 0            | 18  | 5               | 2   | 11  | 0   | 76  | 90  | 7   | 80  | 0   |
| <i>Clostridium limosum</i>                        | 0   | 0    | 0            | 0    | 0            | 0           | 0            | 0            | 0   | 0               | 0   | 0   | 0   | 20  | 11  | 0   | 0   | 0   |
| <i>Clostridium novyi</i> A                        | 0   | 0    | 0            | 0    | 0            | 0           | 0            | 0            | 0   | 59              | 0   | 0   | 0   | 0   | 47  | 0   | 0   | 0   |
| <i>Clostridium paraputrificum</i>                 | 0   | 51   | 2            | 99   | 9            | 94          | 5            | 0            | 96  | 6               | 0   | 0   | 0   | 0   | 5   | 0   | 94  | 0   |
| <i>Clostridium perfringens</i>                    | 0   | 39   | 69           | 98   | 76           | 36          | 96           | 18           | 98  | 81              | 2   | 26  | 4   | 80  | 92  | 43  | 96  | 0   |
| <i>Clostridium ramosum</i>                        | 0   | 90   | 0            | 84   | 99           | 99          | 76           | 0            | 99  | 0               | 29  | 2   | 0   | 0   | 33  | 0   | 0   | 0   |
| <i>Clostridium septicum</i>                       | 0   | 2    | 16           | 99   | 14           | 0           | 2            | 0            | 99  | 0               | 0   | 0   | 0   | 0   | 10  | 9   | 5   | 0   |
| <i>Clostridium sordellii</i>                      | 98  | 0    | 0            | 0    | 26           | 0           | 0            | 42           | 0   | 28              | 9   | 24  | 99  | 79  | 98  | 92  | 27  | 98  |
| <i>Clostridium sporogenes</i>                     | 0   | 0    | 0            | 7    | 39           | 32          | 0            | 0            | 0   | 2               | 2   | 5   | 99  | 15  | 9   | 16  | 92  | 0   |
| <i>Clostridium subterminale</i>                   | 0   | 0    | 0            | 2    | 0            | 5           | 0            | 36           | 0   | 3               | 63  | 33  | 3   | 36  | 80  | 69  | 94  | 0   |
| <i>Clostridium tertium</i>                        | 0   | 84   | 76           | 98   | 47           | 26          | 96           | 2            | 99  | 8               | 0   | 0   | 11  | 0   | 91  | 5   | 8   | 0   |
| <i>Clostridium tetani</i>                         | 0   | 0    | 0            | 0    | 0            | 0           | 0            | 0            | 0   | 13              | 0   | 0   | 0   | 0   | 66  | 0   | 0   | 26  |
| <i>Collinsella aerofaciens</i> <sup>d</sup>       | 0   | 77   | 9            | 2    | 76           | 10          | 5            | 0            | 20  | 13              | 5   | 9   | 93  | 26  | 97  | 56  | 0   | 0   |
| <i>Eggerthella lenta</i> <sup>e</sup>             | 0   | 0    | 0            | 0    | 3            | 0           | 0            | 0            | 2   | 0               | 0   | 11  | 1   | 5   | 97  | 73  | 0   | 0   |
| <i>Eubacterium limosum</i>                        | 0   | 0    | 0            | 0    | 0            | 7           | 0            | 0            | 0   | 12              | 95  | 18  | 9   | 16  | 5   | 0   | 0   | 0   |
| <i>Lactobacillus acidophilus</i>                  | 0   | 81   | 0            | 21   | 91           | 99          | 12           | 0            | 73  | 0               | 99  | 98  | 90  | 76  | 98  | 98  | 78  | 0   |
| <i>Lactobacillus casei</i>                        | 0   | 89   | 0            | 70   | 78           | 96          | 0            | 22           | 99  | 5               | 82  | 97  | 80  | 16  | 98  | 90  | 90  | 0   |
| <i>Lactobacillus cateniforme</i>                  | 0   | 5    | 0            | 9    | 99           | 99          | 5            | 0            | 93  | 0               | 0   | 71  | 0   | 0   | 98  | 0   | 88  | 0   |
| <i>Lactobacillus fermentum</i>                    | 0   | 26   | 2            | 96   | 86           | 0           | 99           | 0            | 0   | 0               | 5   | 81  | 0   | 88  | 98  | 96  | 0   | 0   |
| <i>Lactobacillus jensenii</i>                     | 0   | 71   | 1            | 0    | 82           | 99          | 2            | 0            | 5   | 0               | 0   | 93  | 99  | 98  | 98  | 95  | 0   | 0   |
| <i>Mobiluncus curtisii</i>                        | 0   | 19   | 0            | 12   | 99           | 5           | 95           | 11           | 0   | 5               | 26  | 30  | 99  | 80  | 95  | 3   | 0   | 0   |
| <i>Mobiluncus mulieris</i>                        | 0   | 26   | 2            | 31   | 99           | 5           | 0            | 15           | 0   | 3               | 27  | 32  | 99  | 85  | 90  | 5   | 0   | 0   |
| <i>Propionibacterium acnes</i>                    | 0   | 0    | 0            | 5    | 52           | 0           | 0            | 0            | 88  | 2               | 96  | 98  | 98  | 48  | 98  | 96  | 71  | 85  |
| <i>Propionibacterium granulosum</i>               | 0   | 0    | 5            | 0    | 82           | 0           | 67           | 0            | 0   | 0               | 98  | 98  | 99  | 33  | 96  | 60  | 0   | 0   |
| <i>Propionibacterium propionicum</i> <sup>f</sup> | 0   | 18   | 2            | 78   | 99           | 0           | 99           | 12           | 0   | 0               | 75  | 75  | 65  | 88  | 98  | 12  | 0   | 0   |

<sup>a</sup>Previously designated as *Actinomyces pyogenes*<sup>b</sup>Previously designated as *Lactobacillus minutus*<sup>c</sup>*C. botulinum* Group I consists of toxin type A and proteolytic strains of toxin type B and F.<sup>d</sup>*C. botulinum* Group II consists of toxin type E and nonproteolytic strains of toxin type B and F.<sup>e</sup>Previously designated as *Eubacterium aerofaciens*.<sup>f</sup>Previously designated as *Eubacterium lentum*.<sup>g</sup>Previously designated as *Propionibacterium propionicum*

# remel

## Système RapID ANA II

### INDICATION

Le système RapID™ ANA II de Remel est une microméthode qualitative faisant appel à des substrats conventionnels et chromogéniques pour l'identification de bactéries anaérobies médicalement importantes isolées à partir de spécimens cliniques humains. L'utilisation du système RapID ANA II pour l'identification et la différenciation de bactéries anaérobies d'origine vétérinaire n'a pas été pleinement établie. Les tableaux différentiels RapID ANA II contiennent la liste intégrale des organismes concernés par le système RapID ANA II.

### RÉSUMÉ ET EXPLICATION

Le système RapID ANA II se compose (1) des plaquettes RapID ANA II et (2) du réactif RapID ANA II. Chaque plaquette RapID ANA II est équipée de plusieurs cavités réactives moulées dans la zone périphérique d'un plateau jetable en plastique. Les cavités réactives contiennent des agents réactifs déshydratés et le plateau autorise l'inoculation simultanée de toutes les cavités par une quantité prédéterminée d'inoculum. Une suspension de l'organisme testé dans le liquide d'inoculation RapID™ est utilisée comme inoculum pour la réhydratation et le début des réactions au test. Après incubation de la plaquette, la réactivité de chaque cavité de test est déterminée par l'observation du développement d'une couleur. Dans certains cas, il est nécessaire d'ajouter des réactifs dans les cavités pour provoquer un virage. Le modèle résultant de scores positifs et négatifs au test sert de base à l'identification de l'isolat du test en comparant les résultats obtenus à des modèles de réactivité enregistrés dans une base de données, via l'utilisation d'Electronic RapID Compendium (ERIC™) ou grâce au tableau différentiel RapID ANA II.

### PRINCIPE

Les tests utilisés avec le système RapID ANA II s'appuient sur la détection par divers indicateurs de la dégradation microbienne de substrats spécifiques. Les réactions employées qui combinent tests conventionnels et tests chromogéniques sur substrat unique sont décrites ci-après dans le tableau 1.

### RÉACTIFS\*

**Réactif RapID ANA II** (fourni dans le kit) (15 ml/flacon)

Ingrédients réactifs par litre:

p-Diméthylaminocinnaldéhyde.....0,06 g

**Liquide d'Inoculation RapID** (R8325102, fourni séparément)

(1 ml/tube)

KCl..... 6,0 g

CaCl<sub>2</sub>..... 0,5 g

Eau déminéralisée .....1000,0ml

**Réactif Spot Indole RapID** (R8309002, fourni séparément)

(15 ml/flacon)

p-Diméthylaminocinnaldéhyde.....10,0 g

Acide chlorhydrique.....100,0ml

Eau déminéralisée .....900,0ml

\*Avec compensations éventuelles pour satisfaire les normes de performance.

### PRÉCAUTIONS

Ce produit exclusivement destiné à un usage diagnostique *in vitro* ne doit être utilisé que par des personnes dûment formées. Toutes les précautions contre les risques microbiologiques doivent être prises et il est indispensable de bien stériliser les prélèvements, les récipients, les milieux et les plaquettes de test après usage. Toutes les instructions doivent être lues attentivement et scrupuleusement respectées.

#### Attention !

1. Le réactif RapID ANA II est toxique et peut être nuisible pour l'environnement. Nocif en cas d'inhalation, d'ingestion ou de contact avec la peau ou les yeux. Risque de réduire la fécondité. Dangereux pour l'enfant à naître.
2. Le réactif spot indole RapID peut irriter la peau, les yeux et les voies respiratoires.
3. Se reporter aux fiches signalétiques pour les informations détaillées sur les réactifs chimiques.

#### Composition/Informations sur les ingrédients

2-méthoxyéthanol 109-86-4

Acide acétique 64-19-7

Acide chlorhydrique 7647-01-0

Mention d'avertissement

**DANGER**

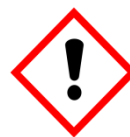

É.-U. uniquement

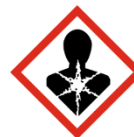

É.-U. et UE

#### Mentions de danger

Provoque une irritation cutanée

Provoque une sévère irritation des yeux

Peut irriter les voies respiratoires

Peut provoquer somnolence ou vertiges

Peut nuire à la fertilité. Peut nuire au fœtus

Risque présumé d'effets graves pour les organes à la suite d'expositions répétées ou d'une exposition prolongée

#### Conseils de prudence

**Prévention**

Se procurer les instructions spécifiques avant utilisation

Ne pas manipuler avant d'avoir lu et compris toutes les précautions de sécurité

Utiliser l'équipement de protection individuel requis

Après manipulation, se laver soigneusement le visage, les mains et les zones cutanées

exposées

Porter un équipement de protection des yeux/du visage

Ne pas respirer les poussières/fumées/gaz/brouillards/vapeurs/aérosols

Utiliser seulement en plein air ou dans un endroit bien ventilé

**Intervention**

EN CAS d'exposition prouvée ou suspectée : demander un avis médical/consulter un médecin

**Inhalation**

EN CAS D'INHALATION : transporter la victime à l'extérieur et la maintenir dans une position où elle peut confortablement respirer.

**Peau**

EN CAS DE CONTACT AVEC LA PEAU : laver abondamment à l'eau et au savon

En cas d'irritation cutanée : demander un avis médical/consulter un médecin

Enlever les vêtements contaminés et les laver avant réutilisation

**Yeux**

EN CAS DE CONTACT AVEC LES YEUX : rincer avec précaution à l'eau pendant plusieurs minutes. Enlever les lentilles de contact si la victime en porte et si elles peuvent être facilement enlevées. Continuer à rincer

Si l'irritation oculaire persiste : demander un avis médical/consulter un médecin

**Stockage**

Garder sous clef

Stocker dans un endroit bien ventilé. Maintenir le récipient fermé de manière étanche

**Mise au rebut**

Éliminer le contenu/récipient dans une usine approuvée de traitement des déchets

**Dangers non classifiés ailleurs (DNCA)**

Aucun connu

**AVERTISSEMENT !** Ce produit contient un produit chimique reconnu par l'État de Californie pour provoquer des anomalies congénitales ou d'autres troubles de la reproduction.

**Numéro de téléphone en cas d'urgence**

INFOTRAC – 24h/24 : 1-800-535-5053

À l'extérieur des États-Unis, numéro d'appel 24h/24 : 001-352-323-3500 (appel à frais virés)

#### **STOCKAGE**

Le système et le réactif spot RapID ANA II doivent être stockés dans leurs conditionnements d'origine et conservés à une température de 2 à 8°C jusqu'à utilisation. Attendre que les produits soient à température ambiante avant de les utiliser. NE PAS échanger les réactifs provenant de différents systèmes RapID. Sortir seulement le nombre de plaquettes nécessaires au test. Refermer immédiatement le sachet en plastique et remettre le produit dans son lieu de stockage entre 2 et 8°C. Une fois sorties, les plaquettes doivent être utilisées le jour même. Le liquide d'inoculation RapID doit être stocké dans son flacon d'origine et conservé à température ambiante (20 à 25°C) jusqu'à son utilisation.



## FRENCH

### DÉTÉRIORATION DU PRODUIT

Ce produit ne doit pas être utilisé si (1) la couleur du réactif a changé, (2) la date de péremption est dépassée, (3) le plateau en plastique est cassé ou son dispositif de fermeture est endommagé ou (4) d'autres signes de détérioration sont présents.

### COLLECTE, STOCKAGE ET TRANSPORT DE PRÉLÈVEMENTS

Les prélèvements doivent être collectés et manipulés conformément aux recommandations en usage dans la profession.<sup>19,20</sup>

### MATÉRIEL FOURNI

(1) 20 plaquettes RapID ANA II, (2) 20 formulaires de rapport, (3) réactif RapID ANA II (un flacon compte-gouttes en plastique contenant du réactif pour 20 plaquettes, (4) 2 boîtes d'incubation en aggloméré, (5) mode d'emploi (IFU).

### MATÉRIEL REQUIS NON FOURNI

(1) Dispositif de stérilisation en boucle, (2) boucle à inoculation, porte-coton, récipients de collecte, (3) incubateurs, systèmes environne-

**Tableau 1. Principes et composants du système RapID ANA II**

| N° cavité                      | Code du test    | Ingrédients réactifs                       | Quantité | Principe                                                                                                                                    | N° dans la bibliographie |                                                                                                                      |        |
|--------------------------------|-----------------|--------------------------------------------|----------|---------------------------------------------------------------------------------------------------------------------------------------------|--------------------------|----------------------------------------------------------------------------------------------------------------------|--------|
| <b>Avant ajout de réactif:</b> |                 |                                            |          |                                                                                                                                             |                          |                                                                                                                      |        |
| 1                              | URE             | Urée                                       | 0,4%     | L'hydrolyse de l'urée produit des éléments de base entraînant une hausse du pH et le changement de l'indicateur.                            | 1-3                      |                                                                                                                      |        |
| 2                              | BLTS            | p-nitrophényle-β, D-disaccharide           | 0,1%     | L'hydrolyse enzymatique du groupement glycoside ou phosphoester aryl substitué entraîne la libération d'o- ou de p-nitrophénol jaune.       | 4-8                      |                                                                                                                      |        |
| 3                              | αARA            | p-nitrophényle-α, L-arabinoside            | 0,1%     |                                                                                                                                             |                          |                                                                                                                      |        |
| 4                              | ONPG            | σ-nitrophényle-β, D-galactoside            | 0,1%     |                                                                                                                                             |                          |                                                                                                                      |        |
| 5                              | αGLU            | p-nitrophényle-α, D-glucoside              | 0,1%     |                                                                                                                                             |                          |                                                                                                                      |        |
| 6                              | βGLU            | p-nitrophényle-β, D-glucoside              | 0,08%    |                                                                                                                                             |                          |                                                                                                                      |        |
| 7                              | αGAL            | p-nitrophényle-α, D-galactoside            | 0,08%    |                                                                                                                                             |                          |                                                                                                                      |        |
| 8                              | αFUC            | p-nitrophényle-α, L-fucoside               | 0,08%    |                                                                                                                                             |                          |                                                                                                                      |        |
| 9                              | NAG             | p-nitrophényle-n-acétyl-β, D-glucosaminide | 0,1%     |                                                                                                                                             |                          |                                                                                                                      |        |
| 10                             | PO <sub>4</sub> | p-nitrophényle-phosphate                   | 0,1%     |                                                                                                                                             |                          |                                                                                                                      |        |
| <b>Après ajout de réactif:</b> |                 |                                            |          |                                                                                                                                             |                          |                                                                                                                      |        |
| 3                              | LGY             | Leucyl-glycine-β-naphthylamide             | 0,08%    | L'hydrolyse enzymatique du substrat arylamide entraîne la libération de β-naphthylamine libre qui est détectée par le réactif RapID ANA II. | 6, 8-14                  |                                                                                                                      |        |
| 4                              | GLY             | Glycine-β-naphthylamide                    | 0,08%    |                                                                                                                                             |                          |                                                                                                                      |        |
| 5                              | PRO             | Proline-β-naphthylamide                    | 0,08%    |                                                                                                                                             |                          |                                                                                                                      |        |
| 6                              | PAL             | Phénylalanine-β-naphthylamide              | 0,05%    |                                                                                                                                             |                          |                                                                                                                      |        |
| 7                              | ARG             | Arginine-β-naphthylamide                   | 0,05%    |                                                                                                                                             |                          |                                                                                                                      |        |
| 8                              | SER             | Sérine-β-naphthylamide                     | 0,08%    |                                                                                                                                             |                          |                                                                                                                      |        |
| 9                              | PYR             | Pyrrolidonyl-β-naphthylamide               | 0,08%    |                                                                                                                                             |                          |                                                                                                                      |        |
| 10                             | IND             | Tryptophane                                | 0,01%    |                                                                                                                                             |                          | L'utilisation du substrat a pour conséquence la formation d'indole qui est détecté par le réactif spot indole RapID. | 15, 16 |

### PROCÉDURE

#### Préparation de l'inoculum:

- Les organismes à tester doivent subir une croissance anaérobie en culture pure et être soumis à une recherche de souche gram avant leur utilisation dans le système.
- Les organismes à tester peuvent être retirés de divers milieux sélectifs et non sélectifs de croissance de gélose. Les types de milieu suivants sont recommandés :

Milieux non sélectifs: gélose au sang anaérobie CDC; gélose avec 5 à 7% de sang de mouton fabriquée à partir d'une base *Brucella*, *Columbia*, infusion cervelle-cœur, Lombard-Dowell ou soja tryptique (TSA).

Milieux différentiels ou sélectifs: gélose au PEA (phenylethyl alcool); gélose enrichie au jaune d'œuf (EYA); gélose à base de paromomycine /vancomycine (PV); gélose à base de kanamycine/vancomycine (KV).

#### Remarques:

- Les « géloses réductibles » contenant du chlorure de palladium ou d'autres agents de réduction NE DOIVENT PAS être utilisés car ces agents risquent d'interférer avec certaines activités enzymatiques.
- Les géloses KBE (kanamycine-bile-esculine) et BBE (*bacteroides*-bile-esculine) ne sont pas recommandées car la combinaison fer-esculine susceptible de se former risque d'interférer avec l'interprétation du test.
- Les milieux contenant, naturellement ou par supplémentation, des monosaccharides ou des disaccharides ne sont pas recommandés car ils risquent d'inhiber l'activité glycolytique et de réduire la réactivité au test. La plupart des formules de gélose de Schaedler contiennent assez de dextrose pour interférer avec l'activité des glycosidases.

mentaux alternatifs, (4) milieux supplémentaires, (5) organismes de contrôle de qualité, (6) réactifs souche gram, (7) lamelles de microscope, (8) porte-coton, (9) liquide d'inoculation RapID-1 ml (R8325102), (10) échelle de turbidité n° 3 McFarland standard ou équivalent (R20413), (11) pipettes, (12) réactif spot indole RapID (R8309002), (13) ERIC (Electronic RapID Compendium, R8323600).

### Symboles du contenu

|                         |                              |
|-------------------------|------------------------------|
| <b>ANA II Panels</b>    | Plaquettes ANA II            |
| <b>Report Forms</b>     | Formulaires de rapport RapID |
| <b>ANA II Reagent</b>   | Réactif ANA II               |
| <b>Incubation Trays</b> | Plateaux d'incubation        |

- Les plaques utilisées pour la préparation de l'inoculum doivent avoir moins de préparation 72 heures (de préférence, 18 à 24 heures).
  - L'utilisation de milieux autres que ceux recommandés peut nuire aux performances du test.
- À l'aide d'un porte-coton ou d'une boucle à inoculation, mettre une quantité suffisante provenant de la culture de la plaque de gélose dans le liquide d'inoculation (1ml) RapID pour obtenir une suspension de l'organisme testé égale au n° 3 sur l'échelle de turbidité McFarland standard ou équivalent.

#### Remarques:

- Les suspensions nettement inférieures au n°3 sur l'échelle de turbidité McFarland standard ont pour conséquence des réactions aberrantes.
  - Les suspensions bactériennes de turbidité **légèrement** supérieure au n°3 sur l'échelle McFarland standard sont sans effet sur les performances du test et sont recommandées pour les cultures souches et pour les souches destinées au contrôle de qualité. Les suspensions préparées avec une turbidité très nettement supérieure au n°3 sur l'échelle McFarland standard nuisent toutefois aux performances du test.
  - Les suspensions doivent être mélangées de façon homogène et, le cas échéant, passées au mélangeur vortex.
  - Les suspensions doivent être utilisées dans les 15 minutes suivant leur préparation.
- L'inoculation d'une plaque de gélose pour en vérifier la pureté et les tests supplémentaires éventuellement nécessaires peuvent être réalisés en prélevant une dose de la suspension dans le tube de liquide d'inoculation et en l'administrant avec la boucle. Incuber la plaque en anaérobiose pendant 18 à 24 heures à une température comprise entre 35 et 37°C.

**Inoculation des plaques Rapid ANA II:**

- Retirer la membrane de la plaquette recouvrant le port d'inoculation en tirant vers le haut et vers la gauche la languette portant la mention « Peel to Inoculate ».
- À l'aide d'une pipette, transférer doucement l'intégralité du contenu du tube de liquide d'inoculation dans l'angle inférieur droit de la plaquette. Reboucher le port d'inoculation en remettant en place la languette précédemment retirée.
- Après avoir ajouté la suspension, tout en maintenant la plaquette en contact avec une surface plane, écarter la languette des cavités de test en la plaçant à un angle d'environ 45 degrés (voir ci-dessous).

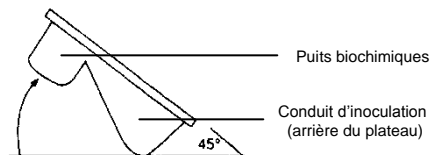

- Alors qu'elle est toujours penchée, agiter doucement la plaquette pour obtenir une distribution homogène de l'inoculum le long des déflecteurs arrière, comme sur l'illustration ci-dessous.

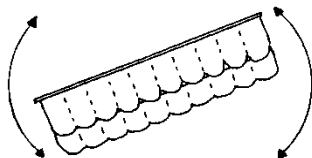

- Tout en stabilisant la plaquette en position horizontale (le plus simple est de faire reposer le fond des cavités réactives sur le plan de travail), faire basculer doucement la plaquette vers les cavités réactives jusqu'à ce que l'inoculum s'y écoule depuis les déflecteurs (voir ci-dessous). Tout l'inoculum doit s'évacuer de la partie arrière de la plaquette.

**Remarque:** Si le mouvement de basculement de la plaquette est trop brusque, il se peut que de l'air soit emprisonné au point de jonction de la cavité de test, d'où une restriction au déplacement du liquide.

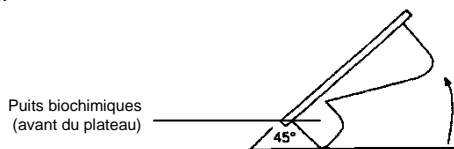

- Remettre la plaquette en position horizontale. Le cas échéant, tapoter doucement la plaquette sur le plan de travail pour évacuer l'air emprisonné dans les cavités.

**Remarques:**

- Examiner les cavités de test. Celles-ci doivent être remplies de façon uniforme, sans bulles. De très légères irrégularités de remplissage des cavités sont acceptables et n'affectent pas les performances du test. Si la plaquette comporte des problèmes de remplissage importants, elle doit être jetée et une autre plaquette doit être inoculée.

- Terminer l'inoculation de chaque plaquette destinée à recevoir le liquide d'inoculation avant d'en inoculer de nouvelles.
- L'inoculum ne doit pas rester dans la partie arrière de la plaquette pendant des périodes prolongées avant la fin de la procédure.

**Incubation des plaques Rapid ANA II:**

Incuber les plaquettes inocuées entre 35-37°C dans un incubateur sans CO<sub>2</sub> pendant une période de 4 heures minimum et 6 heures maximum. Pour faciliter la manipulation, les plaquettes peuvent être incubées dans les boîtes d'incubation en aggloméré fournies avec le kit.

**Remarque:** Après une période d'incubation de 4-6 heures et avant l'ajout de réactifs, il est possible de placer les plaquettes Rapid ANA II au réfrigérateur (2-8°C) jusqu'au lendemain.

**Évaluation des tests des plaquettes Rapid ANA II:**

Les plaquettes Rapid ANA II contiennent 10 cavités réactives permettant d'enregistrer 18 résultats de tests. Les cavités 3 à 10 sont bifonctionnelles, c'est-à-dire que chacune d'elle peut accueillir deux tests. Les tests bifonctionnels sont relevés une première fois avant l'ajout de réactif, ce qui donne un premier résultat, puis la même cavité est examinée à nouveau après l'ajout de réactif pour obtenir un second résultat. Les cavités de test bifonctionnelles 3 à 9, qui nécessitent le réactif Rapid ANA II, sont indiquées avec le premier test au-dessus de la barre et le second en dessous. Le test bifonctionnel n°10, qui utilise le réactif spot indole Rapid, est indiqué par un cadre tracé autour du test nécessitant le réactif.

**Emplacement de test sur plaquette Rapid ANA II**

| N°cavité     | 1   | 2    | 3                   | 4           | 5                   | 6                  | 7                   | 8                   | 9          | 10                     |
|--------------|-----|------|---------------------|-------------|---------------------|--------------------|---------------------|---------------------|------------|------------------------|
| Code du test | URE | BLTS | $\alpha$ ARA<br>LGY | ONPG<br>GLY | $\alpha$ GLU<br>PRO | $\beta$ GLU<br>PAL | $\alpha$ GAL<br>ARG | $\alpha$ FUC<br>SER | NAG<br>PYR | PO <sub>4</sub><br>IND |

- Tout en maintenant fermement la plaquette Rapid ANA II sur le plan de travail, retirer la membrane recouvrant les cavités réactives en tirant vers le haut et vers la gauche la languette située en bas à droite.
- Sans ajouter de réactif, évaluer les résultats des cavités 1 (URE) à 10 (PO<sub>4</sub>) de gauche à droite en fonction du guide d'interprétation du tableau 2. Consigner les résultats dans les cases du formulaire prévues à cet effet, en utilisant le code indiqué au-dessus de la barre pour les tests bifonctionnels.
- Ajouter deux gouttes de réactif spot indole Rapid dans la cavité n° 10 (IND).

**Remarque:** Seul le réactif spot indole Rapid doit être utilisé. Le réactif indole de Kovacs ou d'Ehrlich ne donne pas de résultats satisfaisants.

- Ajouter deux gouttes de réactif Rapid ANA II dans les cavités 3 (LGY) à 9 (PYR).
- Patienter au moins 30 secondes et au plus 2 minutes pour permettre le développement de la couleur. Évaluer les résultats des cavités 3 à 10. Consigner les résultats dans les cases du formulaire prévues à cet effet, en utilisant le code indiqué au-dessus de la barre pour les tests bifonctionnels.
- Identifier le microcode obtenu sur le formulaire de rapport à l'aide ERIC.

**Tableau 2. Interprétation des tests du système Rapid ANA II\***

| N° cavité                      | Code du test    | Réactif                   | Réaction                               |                                                 | Commentaires                                                                                                                                                                                                                                   |
|--------------------------------|-----------------|---------------------------|----------------------------------------|-------------------------------------------------|------------------------------------------------------------------------------------------------------------------------------------------------------------------------------------------------------------------------------------------------|
|                                |                 |                           | positive                               | négative                                        |                                                                                                                                                                                                                                                |
| <b>Avant ajout de réactif:</b> |                 |                           |                                        |                                                 |                                                                                                                                                                                                                                                |
| 1                              | URE             | Aucun                     | rouge ou violacé                       | jaune à orange                                  | Des traces de couleur orange ou rouge-orangé sont à considérer comme une réaction négative.                                                                                                                                                    |
| 2                              | BLTS            | Aucun                     | jaune moyen ou vif                     | vague coloration, brun clair ou jaune très pâle | Seule une couleur jaune nette indique un test positif.                                                                                                                                                                                         |
| 3                              | $\alpha$ ARA    |                           |                                        |                                                 |                                                                                                                                                                                                                                                |
| 4                              | ONPG            |                           |                                        |                                                 |                                                                                                                                                                                                                                                |
| 5                              | $\alpha$ GLU    |                           |                                        |                                                 |                                                                                                                                                                                                                                                |
| 6                              | $\beta$ GLU     |                           |                                        |                                                 |                                                                                                                                                                                                                                                |
| 7                              | $\alpha$ GAL    |                           |                                        |                                                 |                                                                                                                                                                                                                                                |
| 8                              | $\alpha$ FUC    |                           |                                        |                                                 |                                                                                                                                                                                                                                                |
| 9                              | NAG             |                           |                                        |                                                 |                                                                                                                                                                                                                                                |
| 10                             | PO <sub>4</sub> |                           |                                        |                                                 |                                                                                                                                                                                                                                                |
| <b>Après ajout de réactif:</b> |                 |                           |                                        |                                                 |                                                                                                                                                                                                                                                |
| 3                              | LGY             | Réactif Rapid ANA II      | violacé, violet, rouge ou rose soutenu | jaune, orange ou jaune pâle                     | Patienter au moins 30 secondes et au plus 2 minutes pour permettre le développement de la couleur. Seule une couleur bien définie doit être considérée comme la marque d'un test positif. Les nuances pâles sont à considérer comme négatives. |
| 4                              | GLY             |                           |                                        |                                                 |                                                                                                                                                                                                                                                |
| 5                              | PRO             |                           |                                        |                                                 |                                                                                                                                                                                                                                                |
| 6                              | PAL             |                           |                                        |                                                 |                                                                                                                                                                                                                                                |
| 7                              | ARG             |                           |                                        |                                                 |                                                                                                                                                                                                                                                |
| 8                              | SER             |                           |                                        |                                                 |                                                                                                                                                                                                                                                |
| 9                              | PYR             |                           |                                        |                                                 |                                                                                                                                                                                                                                                |
| 10                             | IND             | Réactif Rapid Spot Indole | bleu ou bleu-vert                      | toute autre couleur                             | Toute nuance de bleu ou de bleu-vert doit être considérée comme positive, quelle qu'en soit l'intensité.                                                                                                                                       |

\*REMARQUE: Les plaquettes doivent être examinées en regardant les puits de réaction contre un fond blanc.

**RÉSULTATS ET PLAGE DES VALEURS ATTENDUES**

Les tableaux différentiels Rapid ANA II illustrent les résultats attendus pour le système Rapid ANA II. Ces résultats sont exprimés sous la forme d'une série de pourcentages positifs pour le test de chaque système. Ces informations offrent un soutien statistique à l'utilisation de chaque test et, par un codage chiffré des résultats de tests numériques, constituent la base d'une approche probabiliste pour l'identification de l'isolat de test.

Les identifications sont réalisées à l'aide de résultats individuels constatés sur des plaquettes Rapid ANA II associés à d'autres informations relevées en laboratoire (ex.: souche gram, aérotolérance, croissance en milieu différentiel ou sélectif) pour définir un modèle ressemblant statistiquement à la réactivité connue de taxons enregistrés dans la base de données du système Rapid. Ces modèles sont comparés à l'aide des tableaux différentiels Rapid ANA II ou déterminés à partir d'un microcode et de la liste des codes Rapid ANA II ou ERIC.

**CONTRÔLE DE QUALITÉ**

Tous les numéros de lots du système Rapid ANA II ont été testés avec les organismes de contrôle de qualité suivants et reconnus acceptables. Les tests des organismes de contrôle effectués doivent satisfaire aux critères établis pour les procédures de contrôle de qualité en laboratoire. En cas de résultats de contrôle de qualité aberrants, les données patient

n'ont pas à être enregistrées. Le tableau 3 donne la liste des résultats attendus pour les organismes soumis à la batterie de tests sélectionnée.

**Remarques:**

- Le contrôle de qualité du réactif Rapid s'effectue par l'obtention des réactions attendues pour les tests nécessitant l'ajout de réactifs (cavités 3 à 10).
- Les organismes ayant été transférés de façon répétée et prolongée dans des milieux gélose donnent parfois des résultats aberrants.
- Les souches destinées au contrôle de qualité doivent être congelées ou lyophilisées. Avant leur utilisation, ces souches doivent être transférées deux ou trois fois de leur lieu de stockage sur un milieu gélose recommandé avec le système Rapid ANA II.
- Les formules, les additifs et les ingrédients des milieux de culture varient d'un fabricant à l'autre et peuvent même varier d'un lot à l'autre. Il en résulte que les milieux de culture peuvent parfois influencer l'activité enzymatique constitutive de certaines souches destinées au contrôle de qualité. Si les résultats d'une souche contrôle qualité ne sont pas conformes aux modèles attendus, une sous-culture implantée dans un milieu provenant d'un autre lot ou d'un autre fabricant élimine souvent ces disparités.

**Tableau 3. Contrôle de qualité des plaquettes Rapid ANA II**

| Organisme                                                    | Avant ajout de réactif |      |      |      |      |      |      |      |     |                 | Après ajout de réactif Rapid ANA II |     |     |     |     |     |     | Spot indole |
|--------------------------------------------------------------|------------------------|------|------|------|------|------|------|------|-----|-----------------|-------------------------------------|-----|-----|-----|-----|-----|-----|-------------|
|                                                              | URE                    | BLTS | αARA | ONPG | αGLU | βGLU | αGAL | αFUC | NAG | PO <sub>4</sub> | LGY                                 | GLY | PRO | PAL | ARG | SER | PYR |             |
| <i>Clostridium sordellii</i> <sup>a</sup><br>ATCC® 9714      | +                      | -    | -    | -    | -    | -    | -    | V    | -   | -               | -                                   | V   | +   | V   | V   | V   | V   | +           |
| <i>Parabacteroides distasonis</i> <sup>a</sup><br>ATCC® 8503 | -                      | +    | V    | +    | +    | +    | +    | -    | +   | +               | +                                   | +   | -   | +   | +   | +   | +   | -           |
| <i>Bacteroides uniformis</i><br>ATCC® 8492                   | -                      | +    | +    | +    | +    | +    | +    | +    | +   | +               | +                                   | -   | -   | -   | -   | -   | -   | +           |

+, positif ; -, négatif ; V, variable

<sup>a</sup>Les souches indicatrices principales présentent des performances acceptables au substrat le plus labile du système et une réactivité dans un nombre important de puits, conformément aux préconisations du « Clinical and Laboratory Standards Institute » relatives à un contrôle de qualité simplifié.<sup>36</sup>

**Tableau différentiel Rapid ANA II: coques**

| Organism                                           | URE | BLTS | αARA | ONPG | αGLU | βGLU | αGAL | αFUC | NAG | PO <sub>4</sub> | LGY | GLY | PRO | PAL | ARG | SER | PYR | IND |
|----------------------------------------------------|-----|------|------|------|------|------|------|------|-----|-----------------|-----|-----|-----|-----|-----|-----|-----|-----|
| <i>Anaerococcus hydrogenalis</i> <sup>a</sup>      | 0   | 0    | 0    | 0    | 98   | 0    | 0    | 0    | 0   | 2               | 9   | 14  | 2   | 1   | 65  | 2   | 96  | 99  |
| <i>Anaerococcus prevotii</i> <sup>b</sup>          | 2   | 0    | 0    | 0    | 9    | 1    | 0    | 0    | 0   | 9               | 11  | 21  | 11  | 16  | 96  | 68  | 2   | 0   |
| <i>Anaerococcus tetradius</i> <sup>c</sup>         | 88  | 5    | 0    | 12   | 88   | 16   | 5    | 0    | 0   | 0               | 33  | 96  | 0   | 88  | 97  | 90  | 61  | 0   |
| <i>Blautia producta</i> <sup>a</sup>               | 0   | 51   | 0    | 99   | 99   | 96   | 56   | 0    | 52  | 0               | 0   | 2   | 0   | 2   | 9   | 6   | 0   | 0   |
| <i>Fingoldia magna</i> <sup>a</sup>                | 0   | 0    | 0    | 0    | 2    | 0    | 0    | 0    | 2   | 6               | 95  | 96  | 2   | 82  | 98  | 95  | 98  | 0   |
| <i>Gemella morbillorum</i> <sup>1</sup>            | 0   | 0    | 0    | 18   | 80   | 1    | 0    | 0    | 0   | 68              | 71  | 73  | 88  | 93  | 99  | 98  | 4   | 0   |
| <i>Micromonas micros</i> <sup>9</sup>              | 0   | 0    | 0    | 0    | 4    | 0    | 0    | 0    | 5   | 93              | 95  | 98  | 92  | 88  | 98  | 96  | 86  | 0   |
| <i>Peptoniphilus asaccharolyticus</i> <sup>h</sup> | 0   | 0    | 0    | 0    | 3    | 1    | 0    | 0    | 0   | 4               | 11  | 22  | 5   | 20  | 96  | 21  | 8   | 99  |
| <i>Peptoniphilus indolicus</i> <sup>1</sup>        | 0   | 2    | 0    | 0    | 0    | 0    | 0    | 0    | 0   | 99              | 28  | 76  | 0   | 81  | 91  | 98  | 0   | 99  |
| <i>Peptostreptococcus anaerobius</i>               | 0   | 0    | 0    | 0    | 96   | 0    | 0    | 0    | 2   | 0               | 0   | 8   | 92  | 16  | 68  | 18  | 0   | 0   |
| <i>Staphylococcus saccharolyticus</i>              | 21  | 0    | 0    | 0    | 0    | 0    | 0    | 0    | 0   | 18              | 0   | 0   | 0   | 0   | 0   | 0   | 0   | 0   |
| <i>Streptococcus constellatus</i>                  | 0   | 0    | 0    | 0    | 46   | 91   | 18   | 0    | 12  | 94              | 82  | 97  | 6   | 98  | 99  | 93  | 6   | 0   |
| <i>Streptococcus intermedius</i>                   | 0   | 29   | 9    | 99   | 92   | 95   | 8    | 0    | 21  | 92              | 92  | 98  | 78  | 98  | 99  | 96  | 5   | 0   |
| <i>Veillonella</i> spp. <sup>1</sup>               | 0   | 0    | 0    | 0    | 4    | 0    | 0    | 0    | 0   | 59              | 2   | 9   | 1   | 5   | 38  | 16  | 83  | 0   |

<sup>a</sup>Désigné précédemment sous le nom de *Peptostreptococcus hydrogenalis*.

<sup>b</sup>Désigné précédemment sous le nom de *Peptostreptococcus prevotii*.

<sup>c</sup>Désigné précédemment sous le nom de *Peptostreptococcus tetradius*.

<sup>d</sup>Désigné précédemment sous le nom de *Peptostreptococcus productus*.

<sup>e</sup>Désigné précédemment sous le nom de *Peptostreptococcus magnus*.

<sup>f</sup>Désigné précédemment sous le nom de *Streptococcus morbillorum*.

<sup>g</sup>Désigné précédemment sous le nom de *Peptostreptococcus micros*.

<sup>h</sup>Désigné précédemment sous le nom de *Peptostreptococcus asaccharolyticus*.

<sup>i</sup>Désigné précédemment sous le nom de *Peptostreptococcus indolicus*.

<sup>1</sup>Constitué de trois espèces issues de spécimens cliniques humains: *V. parvula*, *V. dispar* et *V. atypica*.

**LIMITATIONS**

1. L'utilisation du système Rapid ANA II et l'interprétation des résultats exigent l'intervention d'un technicien de laboratoire compétent et formé aux méthodes générales en usage en microbiologie, capable en outre de mettre judicieusement à profit ses connaissances, son expérience, les informations relatives aux échantillons et toutes les autres procédures pertinentes avant d'émettre son avis quant à l'identification obtenue en utilisant ce système.
2. L'origine des spécimens, l'aérotolérance, les caractéristiques de la souche gram et la croissance sur des géloses sélectives doivent être prises en compte lors de l'utilisation du système Rapid ANA II.
3. Le système Rapid ANA II doit être utilisé avec des cultures pures des organismes à tester. L'utilisation de populations microbiennes non homogènes ou le test direct de matériel clinique sans culture donne des résultats aberrants.
4. Le système Rapid ANA II est conçu pour être utilisé avec les taxons dont la liste est donnée dans les tableaux différentiels Rapid ANA II. L'utilisation d'organismes non recensés dans ces listes peut conduire à des erreurs d'identification.
5. Les valeurs attendues listées pour le système Rapid ANA II peuvent ne pas être identiques aux résultats de tests conventionnels ou à des informations divulguées précédemment.

6. La précision du système Rapid ANA II repose sur l'utilisation statistique d'une multiplicité de tests spécialement conçus et sur une base de données exclusive. L'utilisation individuelle des tests proposés par le système Rapid ANA II dans le but d'établir l'identification d'un isolat de test est sujette aux erreurs inhérentes à ce test pris de façon autonome.

**PERFORMANCES**

Les performances du système Rapid ANA II ont été établies par le test en laboratoire de cultures de référence et de cultures souches.<sup>5,10,21-35</sup>

**BIBLIOGRAPHIE**

1. Blazevic, D.J. and G.M. Ederer. 1975. Principles of Biochemical Tests in Diagnostic Microbiology. John Wiley & Sons, New York, NY.
2. Dowell, V.R., Jr. and T.M. Hawkins. 1977. Laboratory Methods in Anaerobic Bacteriology, CDC Laboratory Manual. U.S. Dept. of H.H.S. CDC, Atlanta, GA.
3. Holdeman, L.V., E.P. Cato, and W.E.C. Moore. 1977. Anaerobe Laboratory Manual. 4<sup>th</sup> ed. Virginia Polytechnic Institute and State University, Blacksburg, VA.
4. Barnes, E.H. and J.F. Morris. 1957. J. Bacteriol. 73:100-104.
5. Dellinger, C.A. and L.V. Moore. 1986. J. Clin. Microbiol. 23:289-293.
6. Guibault, G.G. 1970. Enzymatic Methods of Analysis. p. 43-51. Pergamon Press, New York, NY.
7. Killian, M. and P. Bulow. 1976. Acta. Pathol. Microbiol. Scand. B. 84:245-251.
8. Tharagot, D., P.R. Sisson, C.M. Roxby, H.R. Ingham, and J.B. Selkon. 1977. J. Clin. Pathol. 30:505-509.
9. Bodansky, O. and A.L. Latner. 1975. Advances in Clinical Chemistry. Vol. 17, p. 53-61. Academic Press, New York, NY.

**FRENCH**

10. Celig, D.M. and P.C. Schreckenberger. 1991. J. Clin. Microbiol. 29:457-462.  
 11. Nagatsu, T., M. Hino, H. Fuyamada, T. Hayakawa, S. Sakakibara, Y. Nakagawa, and T. Takemoto. 1976. Anal. Biochem. 74:466-476.  
 12. Norris, J.R. and D.W. Ribbons. 1976. Methods in Microbiology. Vol. 9, p. 1-14. Academic Press, New York, NY.  
 13. Peterson, E.H. and E.J. Hsu. 1978. J. Food Sci. 43:1853-1856.  
 14. Westley, J.R., P.J. Anderson, V.A. Close, B. Halpern, and E.M. Lederberg. 1967. Appl. Microbiol. 15:822-825.  
 15. Fay, G.D. and A.L. Barry. 1974. Appl. Microbiol. 15:822-825.  
 16. Sutter, V.L. and W.T. Carter. 1972. J. Clin. Pathol. 58-335-339.  
 17. Holdeman, L.V., E.P. Cato, and W.E.C. Moore. 1987. Anaerobe Laboratory Manual Update. Supplement to the 4<sup>th</sup> ed. Virginia Polytechnic Institute and State University, Blacksburg, VA.  
 18. Summanen, P., E.J. Baron, D.M. Citron, C.A. Strong, H.M. Wexler, and S.M. Finegold. 1993. Wadsworth Anaerobic Bacteriology Manual. 5<sup>th</sup> ed. Star Publishing Company, Belmont, CA.  
 19. Murray, P.R., E.J. Baron, J.H. Jorgensen, M.L. Landry, and M.A. Pfaller. 2007. Manual of Clinical Microbiology, 9<sup>th</sup> ed. ASM Press, Washington, D.C.  
 20. Forbes, B.A., D.F. Sahm, and A.S. Weissfeld. 2007. Bailey and Scott's Diagnostic Microbiology, 12<sup>th</sup> ed. Mosby Elsevier, St. Louis, MO.  
 21. Alexander, C.J., D.M. Citron, S. Hunt Gerardo, M.C. Claros, D. Talan, and E.J. Goldstein. 1997. J. Clin. Microbiol. 35:406-411.  
 22. Appelbaum, P.C., C.S. Kaufman, J.C. Keifer, and J.J. Venbrux. 1984. J. Clin. Microbiol. 18:615-621.  
 23. Appelbaum, P.C., J.W. Deppenbusch, and C.S. Kaufman. 1984. Abstract C-153. Abstracts of the 84<sup>th</sup> General Meeting of the American Society for Microbiology. ASM, Washington, D.C.  
 24. Burdash, N.M., K.A. Corey, P.J. Fortuna, M.L. Beasley, E.R. Bannister, and J.P. Manos. 1984. Abstract C-150. Abstracts of the 84<sup>th</sup> General Meeting of the American Society for Microbiology. ASM, Washington, D.C.  
 25. Hamilton, L.T., C. Ayer, and D.N. Wright. 1985. Abstract C-159. Abstracts of the 85<sup>th</sup> General Meeting of the American Society for Microbiology. ASM, Washington, D.C.  
 26. Hansen, S.L. and W.A. Pope. 1984. Abstract C-147. Abstracts of the 84<sup>th</sup> General Meeting of the American Society for Microbiology. ASM, Washington, D.C.  
 27. Hudspeth, M.K., S. Hunt Gerardo, M.F. Maiden, D.M. Citron, and E.J. Goldstein. 1999. J. Clin. Microbiol. 37:2003-2006.  
 28. Kaplan, R.L., M.J. O'Brian, and W. Landua. 1985. Abstract C-163. Abstracts of the 85<sup>th</sup> General Meeting of the American Society for Microbiology. ASM, Washington, D.C.  
 29. Karachewski, N.O., E.L. Busch, and C.L. Wells. 1984. Abstract C-148. Abstracts of the 84<sup>th</sup> General Meeting of the American Society for Microbiology. ASM, Washington, D.C.  
 30. Mangels, J., D. Berkley, and S. Wood. 1984. Abstract C-152. Abstracts of the 84<sup>th</sup> General Meeting of the American Society for Microbiology. ASM, Washington, D.C.  
 31. Marler, L.M., J.A. Sider, L.C. Wolters, Y. Pettigrew, B.L. Skitt, and S.D. Allen. 1991. J. Clin. Microbiol. 29:874-878.  
 32. Morgenstern, F. 1984. Abstract C-154. Abstracts of the 84<sup>th</sup> General Meeting of the American Society for Microbiology. ASM, Washington, D.C.  
 33. Niles, A.C. and P.R. Murray. 1985. Abstract C-161. Abstracts of the 85<sup>th</sup> General Meeting of the American Society for Microbiology. ASM, Washington, D.C.  
 34. Ristow K.L., P.C. Schreckenberger, D.M. Celig, M.A. Ulanday, and L.J. LeBeau. 1984. Abstract C-151. Abstracts of the 84<sup>th</sup> General Meeting of the American Society for Microbiology. ASM, Washington, D.C.

35. Syed, S., W.J. Loesche, and C. Pearson. 1984. Abstract C-155. Abstracts of the 84<sup>th</sup> General Meeting of the American Society for Microbiology. ASM, Washington, D.C.  
 36. Clinical and Laboratory Standards Institute. 2008. Quality Control for Commercial Microbial Identification Systems; Approved Guideline. M50-A. CLSI, Wayne, PA.

**CONDITIONNEMENT**

REF R8311002, système RapID ANA II.....20 tests/kit

**Légendes des symboles**

|               |                                                               |
|---------------|---------------------------------------------------------------|
|               | Contenu suffisant pour <n> tests                              |
| <b>REF</b>    | Numéro de référence                                           |
| <b>IVD</b>    | Dispositif médical de diagnostic <i>in vitro</i>              |
| <b>LAB</b>    | Pour l'usage de laboratoire                                   |
|               | Lire les instructions avant utilisation (IFU = mode d'emploi) |
|               | Limites de température (stockage)                             |
| <b>LOT</b>    | Code de lot (numéro)                                          |
|               | À utiliser avant le (date de péremption)                      |
| <b>EC REP</b> | Représentant autorisé pour l'UE                               |
|               | Fabricant                                                     |

RapID™ est une marque commerciale de Thermo Fisher Scientific et ses filiales.  
 ERIC™ est une marque commerciale de Thermo Fisher Scientific et ses filiales.  
 ATCC® est une marque déposée d'American Type Culture Collection.

|               |                                                                                                                                                     |
|---------------|-----------------------------------------------------------------------------------------------------------------------------------------------------|
|               | 12076 Santa Fe Drive<br>Lenexa, KS 66215, USA<br><a href="http://www.remel.com">www.remel.com</a> , (800) 255-6730<br>International: (913) 888-0939 |
| <b>EC REP</b> | Remel Europe Ltd.<br>Clipper Boulevard West, Crossways<br>Dartford, Kent, DA2 6PT, UK                                                               |

Pour tout support technique, contacter le distributeur local.  
 IFU 8311002, révisé le 2017-06-01

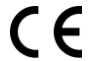

Imprimé aux États-Unis d'Amérique

Tableau différentiel RapID ANA II: bacilles à gram négatif

| Organism                                            | URE | BLTS | αARA | ONPG | αGLU | βGLU | αGAL | αFUC | NAG | PO <sub>4</sub> | LGY | GLY | PRO | PAL | ARG | SER | PYR | IND |
|-----------------------------------------------------|-----|------|------|------|------|------|------|------|-----|-----------------|-----|-----|-----|-----|-----|-----|-----|-----|
| <i>Bacteroides caccae</i>                           | 0   | 79   | 98   | 99   | 88   | 96   | 99   | 97   | 99  | 99              | 96  | 91  | 5   | 75  | 98  | 72  | 0   | 0   |
| <i>Bacteroides eggerthii</i>                        | 0   | 39   | 77   | 93   | 99   | 98   | 42   | 0    | 99  | 98              | 97  | 13  | 0   | 0   | 32  | 5   | 0   | 99  |
| <i>Bacteroides fragilis</i>                         | 0   | 89   | 3    | 94   | 98   | 97   | 98   | 98   | 98  | 98              | 98  | 81  | 1   | 79  | 98  | 81  | 74  | 0   |
| <i>Bacteroides ovatus</i>                           | 0   | 95   | 96   | 88   | 98   | 95   | 98   | 93   | 99  | 98              | 96  | 84  | 0   | 0   | 3   | 2   | 0   | 99  |
| <i>Bacteroides stercoris</i>                        | 0   | 45   | 9    | 22   | 99   | 31   | 0    | 70   | 99  | 99              | 98  | 9   | 0   | 0   | 2   | 4   | 0   | 98  |
| <i>Bacteroides pyogenes</i> <sup>a</sup>            | 0   | 9    | 0    | 92   | 99   | 49   | 2    | 93   | 99  | 99              | 99  | 9   | 0   | 13  | 70  | 22  | 0   | 0   |
| <i>Bacteroides thetaiotaomicron</i>                 | 0   | 92   | 91   | 96   | 98   | 96   | 98   | 98   | 98  | 94              | 98  | 67  | 1   | 49  | 98  | 77  | 3   | 99  |
| <i>Bacteroides uniformis</i>                        | 0   | 93   | 81   | 98   | 99   | 97   | 92   | 93   | 99  | 98              | 98  | 6   | 0   | 2   | 3   | 0   | 0   | 99  |
| <i>Bacteroides vulgatus</i>                         | 0   | 3    | 85   | 95   | 99   | 0    | 99   | 99   | 99  | 95              | 98  | 82  | 4   | 1   | 85  | 52  | 84  | 0   |
| <i>Bilophila wadsworthia</i>                        | 91  | 0    | 0    | 0    | 0    | 0    | 0    | 0    | 0   | 2               | 0   | 2   | 0   | 0   | 95  | 1   | 0   | 0   |
| <i>Campylobacter gracilis</i> <sup>b</sup>          | 0   | 0    | 0    | 0    | 0    | 0    | 0    | 0    | 0   | 0               | 0   | 6   | 0   | 0   | 93  | 5   | 0   | 0   |
| <i>Campylobacter ureolyticus</i> <sup>c</sup>       | 99  | 0    | 0    | 0    | 0    | 0    | 0    | 0    | 0   | 0               | 16  | 8   | 5   | 2   | 82  | 6   | 3   | 0   |
| <i>Capnocytophaga</i> spp.                          | 0   | 42   | 0    | 89   | 96   | 86   | 2    | 1    | 78  | 76              | 99  | 99  | 90  | 99  | 99  | 95  | 13  | 0   |
| <i>Fusobacterium mortiferum</i>                     | 0   | 12   | 0    | 62   | 2    | 70   | 92   | 0    | 0   | 92              | 28  | 42  | 0   | 60  | 96  | 86  | 91  | 0   |
| <i>Fusobacterium necrophorum</i>                    | 0   | 0    | 0    | 0    | 0    | 0    | 0    | 0    | 0   | 38              | 0   | 0   | 0   | 0   | 15  | 2   | 0   | 99  |
| <i>Fusobacterium nucleatum</i>                      | 0   | 0    | 0    | 0    | 0    | 0    | 0    | 0    | 0   | 2               | 0   | 0   | 0   | 0   | 45  | 0   | 36  | 99  |
| <i>Fusobacterium varium</i>                         | 0   | 4    | 0    | 0    | 0    | 0    | 8    | 0    | 2   | 0               | 16  | 72  | 2   | 41  | 98  | 88  | 99  | 60  |
| <i>Odoribacter splanchnicus</i> <sup>d</sup>        | 0   | 8    | 4    | 95   | 0    | 8    | 93   | 92   | 99  | 73              | 91  | 14  | 9   | 34  | 99  | 84  | 99  | 99  |
| <i>Parabacteroides distasonis</i> <sup>e</sup>      | 0   | 90   | 67   | 96   | 99   | 91   | 96   | 0    | 99  | 94              | 96  | 94  | 0   | 70  | 98  | 98  | 91  | 0   |
| <i>Parabacteroides merdae</i> <sup>f</sup>          | 0   | 20   | 12   | 99   | 38   | 29   | 99   | 0    | 98  | 22              | 98  | 99  | 0   | 14  | 99  | 25  | 2   | 0   |
| <i>Porphyromonas asaccharolytica</i>                | 0   | 2    | 0    | 0    | 0    | 0    | 0    | 94   | 0   | 96              | 92  | 22  | 0   | 14  | 60  | 45  | 0   | 99  |
| <i>Porphyromonas endodontalis</i>                   | 0   | 0    | 0    | 0    | 0    | 0    | 0    | 0    | 29  | 95              | 98  | 0   | 0   | 0   | 5   | 2   | 0   | 99  |
| <i>Porphyromonas gingivalis</i>                     | 0   | 2    | 0    | 2    | 0    | 0    | 0    | 0    | 99  | 95              | 96  | 19  | 0   | 5   | 93  | 27  | 27  | 99  |
| <i>Prevotella bivia</i>                             | 0   | 2    | 0    | 97   | 99   | 0    | 0    | 91   | 99  | 98              | 98  | 95  | 2   | 4   | 75  | 24  | 0   | 0   |
| <i>Prevotella buccae</i>                            | 0   | 71   | 31   | 91   | 99   | 94   | 99   | 0    | 1   | 99              | 97  | 10  | 0   | 5   | 6   | 0   | 0   | 0   |
| <i>Prevotella buccalis/veroralis</i>                | 0   | 0    | 0    | 99   | 99   | 6    | 99   | 8    | 95  | 99              | 99  | 98  | 0   | 0   | 0   | 0   | 0   | 0   |
| <i>Prevotella corporis</i>                          | 0   | 0    | 0    | 0    | 98   | 0    | 0    | 29   | 0   | 98              | 96  | 0   | 0   | 0   | 98  | 14  | 6   | 0   |
| <i>Prevotella denticola</i>                         | 0   | 0    | 0    | 99   | 99   | 0    | 91   | 99   | 99  | 99              | 99  | 7   | 0   | 0   | 0   | 0   | 0   | 0   |
| <i>Prevotella disiens</i>                           | 0   | 2    | 0    | 0    | 99   | 0    | 7    | 0    | 0   | 99              | 98  | 90  | 0   | 2   | 90  | 29  | 0   | 0   |
| <i>Prevotella intermedia</i>                        | 0   | 0    | 0    | 0    | 99   | 0    | 0    | 93   | 0   | 98              | 98  | 4   | 0   | 0   | 96  | 6   | 0   | 99  |
| <i>Prevotella loescheii</i>                         | 0   | 0    | 0    | 97   | 98   | 79   | 81   | 80   | 99  | 99              | 99  | 9   | 0   | 1   | 4   | 2   | 0   | 0   |
| <i>Prevotella melaninogenica</i>                    | 0   | 1    | 16   | 98   | 92   | 0    | 90   | 92   | 99  | 98              | 99  | 5   | 0   | 0   | 98  | 2   | 0   | 0   |
| <i>Prevotella oralis</i> Group                      | 0   | 92   | 0    | 92   | 96   | 89   | 91   | 78   | 96  | 98              | 98  | 90  | 0   | 0   | 5   | 2   | 0   | 0   |
| <i>Prevotella oris</i>                              | 0   | 98   | 99   | 88   | 99   | 89   | 78   | 98   | 99  | 99              | 98  | 11  | 0   | 0   | 2   | 0   | 0   | 0   |
| <i>Pseudoflavonifractor capillosus</i> <sup>g</sup> | 0   | 87   | 9    | 95   | 30   | 92   | 0    | 98   | 99  | 96              | 90  | 36  | 0   | 0   | 2   | 5   | 0   | 0   |
| <i>Tannerella forsythia</i> <sup>h</sup>            | 0   | 78   | 0    | 95   | 99   | 50   | 0    | 99   | 99  | 99              | 98  | 12  | 0   | 31  | 99  | 81  | 0   | 98  |
| <i>Wolinella</i> spp.                               | 0   | 0    | 0    | 0    | 0    | 5    | 0    | 0    | 0   | 5               | 0   | 0   | 0   | 0   | 88  | 0   | 0   | 0   |

Gram-Variable Bacilli:

|                                    |   |    |    |    |    |    |    |    |    |    |    |    |    |    |    |   |   |   |
|------------------------------------|---|----|----|----|----|----|----|----|----|----|----|----|----|----|----|---|---|---|
| <i>Clostridium clostridioforme</i> | 0 | 84 | 90 | 84 | 85 | 87 | 98 | 0  | 81 | 2  | 93 | 9  | 1  | 13 | 47 | 2 | 7 | 6 |
| <i>Clostridium ramosum</i>         | 0 | 90 | 0  | 84 | 99 | 99 | 76 | 0  | 99 | 0  | 29 | 2  | 0  | 0  | 33 | 0 | 0 | 0 |
| <i>Mobiluncus curtisii</i>         | 0 | 26 | 2  | 31 | 99 | 5  | 95 | 15 | 0  | 5  | 28 | 32 | 99 | 86 | 90 | 5 | 0 | 0 |
| <i>Mobiluncus mulieris</i>         | 0 | 26 | 2  | 31 | 99 | 5  | 0  | 15 | 0  | 5  | 28 | 32 | 99 | 86 | 90 | 5 | 0 | 0 |
| <i>Tissierella praeacuta</i>       | 0 | 0  | 0  | 0  | 0  | 0  | 0  | 0  | 0  | 85 | 88 | 26 | 0  | 0  | 92 | 0 | 0 | 0 |

<sup>a</sup>Désigné précédemment sous le nom de *Bacteroides tectum*.

<sup>b</sup>Désigné précédemment sous le nom de *Bacteroides gracilis*.

<sup>c</sup>Désigné précédemment sous le nom de *Bacteroides ureolyticus*.

<sup>d</sup>Désigné précédemment sous le nom de *Bacteroides splanchnicus*.

<sup>e</sup>Désigné précédemment sous le nom de *Bacteroides distasonis*.

<sup>f</sup>Désigné précédemment sous le nom de *Bacteroides merdae*.

<sup>g</sup>Désigné précédemment sous le nom de *Bacteroides capillosus*.

<sup>h</sup>Désigné précédemment sous le nom de *Bacteroides forsythus*.

Tableau différentiel RapID ANA II: bacilles à gram positif

| Organism                                          | URE | BLTS | $\alpha$ ARA | ONPG | $\alpha$ GLU | $\beta$ GLU | $\alpha$ GAL | $\alpha$ FUC | NAG | PO <sub>4</sub> | LGY | GLY | PRO | PAL | ARG | SER | PYR | IND |
|---------------------------------------------------|-----|------|--------------|------|--------------|-------------|--------------|--------------|-----|-----------------|-----|-----|-----|-----|-----|-----|-----|-----|
| <i>Actinomyces bovis</i>                          | 0   | 0    | 0            | 0    | 0            | 12          | 0            | 0            | 99  | 0               | 99  | 99  | 99  | 86  | 99  | 99  | 0   | 0   |
| <i>Actinomyces israelii</i>                       | 0   | 29   | 61           | 87   | 99           | 97          | 93           | 0            | 2   | 2               | 86  | 92  | 99  | 98  | 98  | 64  | 19  | 0   |
| <i>Actinomyces meyeri</i>                         | 0   | 2    | 0            | 69   | 93           | 0           | 0            | 0            | 79  | 0               | 92  | 98  | 99  | 78  | 98  | 96  | 38  | 0   |
| <i>Actinomyces naeslundii</i>                     | 90  | 15   | 0            | 96   | 86           | 96          | 93           | 0            | 0   | 15              | 57  | 80  | 97  | 87  | 65  | 10  | 0   | 0   |
| <i>Actinomyces odontolyticus</i>                  | 0   | 4    | 15           | 86   | 96           | 46          | 5            | 92           | 5   | 20              | 92  | 98  | 99  | 82  | 98  | 98  | 0   | 0   |
| <i>Actinomyces turicensis</i>                     | 0   | 0    | 0            | 0    | 99           | 0           | 0            | 28           | 0   | 0               | 88  | 91  | 96  | 90  | 99  | 96  | 0   | 0   |
| <i>Actinomyces viscosus</i>                       | 81  | 76   | 0            | 91   | 99           | 92          | 62           | 0            | 0   | 0               | 76  | 98  | 99  | 86  | 92  | 33  | 0   | 0   |
| <i>Arcanobacterium pyogenes</i> <sup>a</sup>      | 0   | 12   | 15           | 86   | 0            | 0           | 0            | 0            | 99  | 75              | 93  | 96  | 96  | 86  | 98  | 96  | 2   | 0   |
| <i>Atopobium minutum</i> <sup>b</sup>             | 0   | 0    | 0            | 0    | 0            | 26          | 99           | 0            | 0   | 0               | 0   | 12  | 0   | 0   | 98  | 33  | 0   | 0   |
| <i>Bifidobacterium</i> spp.                       | 0   | 79   | 87           | 90   | 99           | 87          | 92           | 0            | 2   | 2               | 11  | 74  | 93  | 95  | 98  | 93  | 0   | 0   |
| <i>Clostridium baratii</i>                        | 0   | 88   | 0            | 87   | 16           | 76          | 93           | 0            | 96  | 0               | 0   | 0   | 0   | 0   | 82  | 0   | 97  | 0   |
| <i>Clostridium beijerinckii</i>                   | 0   | 42   | 0            | 51   | 99           | 98          | 79           | 0            | 0   | 0               | 0   | 0   | 0   | 0   | 0   | 0   | 0   | 0   |
| <i>Clostridium bifermentans</i>                   | 0   | 0    | 0            | 0    | 2            | 0           | 0            | 2            | 68  | 4               | 0   | 5   | 99  | 38  | 86  | 88  | 3   | 94  |
| <i>Clostridium botulinum</i> I <sup>c</sup>       | 0   | 0    | 0            | 0    | 82           | 26          | 0            | 0            | 0   | 0               | 0   | 0   | 99  | 98  | 98  | 98  | 0   | 0   |
| <i>Clostridium botulinum</i> II <sup>d</sup>      | 0   | 0    | 0            | 0    | 99           | 0           | 0            | 0            | 60  | 9               | 0   | 0   | 0   | 0   | 0   | 0   | 0   | 0   |
| <i>Clostridium butyricum</i>                      | 0   | 9    | 85           | 91   | 98           | 0           | 99           | 2            | 0   | 0               | 0   | 0   | 3   | 0   | 9   | 6   | 0   | 0   |
| <i>Clostridium cadaveris</i>                      | 0   | 0    | 0            | 0    | 0            | 0           | 0            | 94           | 99  | 0               | 2   | 7   | 0   | 7   | 87  | 9   | 98  | 99  |
| <i>Clostridium clostridioforme</i>                | 0   | 84   | 90           | 84   | 85           | 87          | 98           | 0            | 81  | 2               | 93  | 9   | 1   | 13  | 47  | 2   | 7   | 6   |
| <i>Clostridium difficile</i>                      | 0   | 2    | 0            | 2    | 8            | 3           | 0            | 0            | 0   | 9               | 2   | 0   | 99  | 43  | 48  | 16  | 6   | 0   |
| <i>Clostridium glycolicum</i>                     | 0   | 0    | 0            | 10   | 0            | 16          | 0            | 0            | 9   | 99              | 0   | 2   | 99  | 0   | 35  | 9   | 46  | 0   |
| <i>Clostridium hastiforme</i>                     | 0   | 0    | 1            | 0    | 0            | 0           | 0            | 0            | 5   | 2               | 88  | 62  | 92  | 72  | 95  | 98  | 0   | 0   |
| <i>Clostridium histolyticum</i>                   | 0   | 0    | 0            | 9    | 0            | 0           | 0            | 0            | 0   | 0               | 3   | 9   | 0   | 98  | 96  | 91  | 98  | 0   |
| <i>Clostridium innocuum</i>                       | 0   | 5    | 0            | 0    | 20           | 36          | 5            | 0            | 18  | 5               | 2   | 11  | 0   | 76  | 90  | 7   | 80  | 0   |
| <i>Clostridium limosum</i>                        | 0   | 0    | 0            | 0    | 0            | 0           | 0            | 0            | 0   | 0               | 0   | 0   | 0   | 20  | 11  | 0   | 0   | 0   |
| <i>Clostridium novyi</i> A                        | 0   | 0    | 0            | 0    | 0            | 0           | 0            | 0            | 0   | 59              | 0   | 0   | 0   | 0   | 47  | 0   | 0   | 0   |
| <i>Clostridium paraputrificum</i>                 | 0   | 51   | 2            | 99   | 9            | 94          | 5            | 0            | 96  | 6               | 0   | 0   | 0   | 0   | 5   | 0   | 94  | 0   |
| <i>Clostridium perfringens</i>                    | 0   | 39   | 69           | 98   | 76           | 36          | 96           | 18           | 98  | 81              | 2   | 26  | 4   | 80  | 92  | 43  | 96  | 0   |
| <i>Clostridium ramosum</i>                        | 0   | 90   | 0            | 84   | 99           | 99          | 76           | 0            | 99  | 0               | 29  | 2   | 0   | 0   | 33  | 0   | 0   | 0   |
| <i>Clostridium septicum</i>                       | 0   | 2    | 16           | 99   | 14           | 0           | 2            | 0            | 99  | 0               | 0   | 0   | 0   | 0   | 10  | 9   | 5   | 0   |
| <i>Clostridium sordellii</i>                      | 98  | 0    | 0            | 0    | 26           | 0           | 0            | 42           | 0   | 28              | 9   | 24  | 99  | 79  | 98  | 92  | 27  | 98  |
| <i>Clostridium sporogenes</i>                     | 0   | 0    | 0            | 7    | 39           | 32          | 0            | 0            | 0   | 2               | 2   | 5   | 99  | 15  | 9   | 16  | 92  | 0   |
| <i>Clostridium subterminale</i>                   | 0   | 0    | 0            | 2    | 0            | 5           | 0            | 36           | 0   | 3               | 63  | 33  | 3   | 36  | 80  | 69  | 94  | 0   |
| <i>Clostridium tertium</i>                        | 0   | 84   | 76           | 98   | 47           | 26          | 96           | 2            | 99  | 8               | 0   | 0   | 11  | 0   | 91  | 5   | 8   | 0   |
| <i>Clostridium tetani</i>                         | 0   | 0    | 0            | 0    | 0            | 0           | 0            | 0            | 0   | 13              | 0   | 0   | 0   | 0   | 66  | 0   | 0   | 26  |
| <i>Collinsella aerofaciens</i> <sup>e</sup>       | 0   | 77   | 9            | 2    | 76           | 10          | 5            | 0            | 20  | 13              | 5   | 9   | 93  | 26  | 97  | 56  | 0   | 0   |
| <i>Eggerthella lenta</i> <sup>f</sup>             | 0   | 0    | 0            | 0    | 3            | 0           | 0            | 0            | 2   | 0               | 0   | 11  | 1   | 5   | 97  | 73  | 0   | 0   |
| <i>Eubacterium limosum</i>                        | 0   | 0    | 0            | 0    | 0            | 7           | 0            | 0            | 0   | 12              | 95  | 18  | 9   | 16  | 5   | 0   | 0   | 0   |
| <i>Lactobacillus acidophilus</i>                  | 0   | 81   | 0            | 21   | 91           | 99          | 12           | 0            | 73  | 0               | 99  | 98  | 90  | 76  | 98  | 98  | 78  | 0   |
| <i>Lactobacillus casei</i>                        | 0   | 89   | 0            | 70   | 78           | 96          | 0            | 22           | 99  | 5               | 82  | 97  | 80  | 16  | 98  | 90  | 90  | 0   |
| <i>Lactobacillus catenaforme</i>                  | 0   | 5    | 0            | 9    | 99           | 99          | 5            | 0            | 93  | 0               | 0   | 71  | 0   | 0   | 98  | 0   | 88  | 0   |
| <i>Lactobacillus fermentum</i>                    | 0   | 26   | 2            | 96   | 86           | 0           | 99           | 0            | 0   | 0               | 5   | 81  | 0   | 88  | 98  | 96  | 0   | 0   |
| <i>Lactobacillus jensenii</i>                     | 0   | 71   | 1            | 0    | 82           | 99          | 2            | 0            | 5   | 0               | 0   | 93  | 99  | 98  | 98  | 95  | 0   | 0   |
| <i>Mobiluncus curtisii</i>                        | 0   | 19   | 0            | 12   | 99           | 5           | 95           | 11           | 0   | 5               | 26  | 30  | 99  | 80  | 95  | 3   | 0   | 0   |
| <i>Mobiluncus mulieris</i>                        | 0   | 26   | 2            | 31   | 99           | 5           | 0            | 15           | 0   | 3               | 27  | 32  | 99  | 85  | 90  | 5   | 0   | 0   |
| <i>Propionibacterium acnes</i>                    | 0   | 0    | 0            | 5    | 52           | 0           | 0            | 0            | 88  | 2               | 96  | 98  | 98  | 48  | 98  | 96  | 71  | 85  |
| <i>Propionibacterium granulosum</i>               | 0   | 0    | 5            | 0    | 82           | 0           | 67           | 0            | 0   | 0               | 98  | 98  | 99  | 33  | 96  | 60  | 0   | 0   |
| <i>Propionibacterium propionicum</i> <sup>g</sup> | 0   | 18   | 2            | 78   | 99           | 0           | 99           | 12           | 0   | 0               | 75  | 75  | 65  | 88  | 98  | 12  | 0   | 0   |

<sup>a</sup>Désigné précédemment sous le nom d'*Actinomyces pyogenes*.<sup>b</sup>Désigné précédemment sous le nom de *Lactobacillus minutis*.<sup>c</sup>Le *C. botulinum* groupe I est constitué de toxine de type A et de souches protéolytiques de toxine de types B et F.<sup>d</sup>Le *C. botulinum* groupe II est constitué de toxine de type E et de souches non protéolytiques de toxine de types B et F.<sup>e</sup>Désigné précédemment sous le nom d'*Eubacterium aerofaciens*.<sup>f</sup>Désigné précédemment sous le nom d'*Eubacterium lentum*.<sup>g</sup>Désigné précédemment sous le nom de *Propionibacterium propionicus*.

**remel****RapID ANA II System****VERWENDUNGSZWECK**

Das RapID™ ANA II System der Firma Remel ist eine qualitative Mikromethode, bei der konventionelle und chromogene Substrate zur Identifizierung von medizinisch bedeutsamen anaeroben Bakterien eingesetzt werden, die aus humanem klinischen Untersuchungsmaterial isoliert wurden. Die Eignung des RapID ANA II Systems zur Identifizierung und Differenzierung von anaeroben Bakterien tierischen Ursprungs ist noch nicht ausreichend nachgewiesen. Eine vollständige Liste der vom RapID ANA II System bestimmten Organismen ist in den RapID ANA II Differenzierungstabellen enthalten.

**ZUSAMMENFASSENDE ERLÄUTERUNG**

Das RapID ANA II System besteht aus den(1) RapID ANA II Panel und (2) dem RapID ANA II Reagenz. Jedes RapID ANA II Panel enthält mehrere Reaktionsvertiefungen, eingebettet in einem Kunststoffpanel. Die Reaktionsvertiefungen enthalten dehydrierte Reaktanten. Die Konzipierung ermöglicht die gleichzeitige Beschickung der einzelnen Vertiefungen mit einer definierten Menge an Inokulum. Als Inokulum werden in RapID Inokulationsflüssigkeit suspendierte Testorganismen verwendet, die die Reaktanten rehydrieren und die Testreaktionen auslösen. Nach der Inkubation des Panels wird jede Testvertiefung anhand der Farbveränderung auf Reaktivität untersucht. In einigen Fällen müssen Reagenzien hinzugefügt werden, um eine Farbänderung hervorzurufen. Das resultierende Muster positiver und negativer Testergebnisse bildet die Grundlage zur Identifikation der isolierten Testorganismen durch Vergleich der Testergebnisse mit in einer Datenbank gespeicherten Reaktionsmustern. Hierzu werden das Electronic RapID Compendium (ERIC™) oder die RapID ANA II Differenzierungstabelle herangezogen.

**PRINZIP**

Die mit dem RapID ANA II System verwendeten Tests basieren auf dem mikrobiellen Abbau bestimmter Substrate, der durch verschiedene Indikatorsysteme nachgewiesen wird. Die angewandten Reaktionen sind eine Kombination aus konventionellen Tests und chromogenen Einzelsubstrattests. Sie sind in Tabelle 1 beschrieben.

**REAGENZEN\*****RapID ANA II Reagenz (im Kit enthalten)**

(15 ml/Fläschchen)

Reaktive Bestandteil pro Liter:

p-Dimethylaminocinnamaldehyd..... 0,06 g

**RapID Inokulationsflüssigkeit (R8325102, separat erhältlich)**

(1 ml/Röhrchen)

KCl..... 6,0 g

CaCl<sub>2</sub>..... 0,5 g

Demineralisiertes Wasser..... 1000,0 ml

**RapID Spot-Indol-Reagenz (R8309002, separat erhältlich)**

(15 ml/Fläschchen)

p-Dimethylaminocinnamaldehyd..... 10,0 g

Salzsäure..... 100,0 ml

Demineralisiertes Wasser..... 900,0 ml

\*Anpassung, wenn zur Erfüllung von Leistungsstandards erforderlich.

**VORSICHTSMASSNAHMEN**

Bei diesen Produkten handelt es sich um *In-Vitro*-Diagnostika, die nur von entsprechend geschultem Personal verwendet werden sollten. Zur Minimierung des Infektionsrisikos sollten Vorsichtsmaßnahmen, wie ordnungsgemäße Sterilisation der Proben, Probenbehältnisse, Medien und Testpanel nach deren Gebrauch, getroffen werden. Anweisungen sollten sorgfältig gelesen und befolgt werden.

**Vorsicht!**

- Das RapID ANA II Reagenz ist giftig und kann schädliche Wirkungen auf die Umwelt haben. Es ist gesundheitsschädlich beim Einatmen, bei Berührung mit der Haut oder den Augen und bei Verschlucken. Hierdurch kann die Fertilität beeinträchtigt und das ungeborene Kind im Mutterleib geschädigt werden.
- Das RapID Spot-Indol-Reagenz kann eine Reizung der Haut, der Augen und des Respirationstrakts hervorrufen.
- Das Material Sicherheitsdatenblatt enthält detaillierte Informationen über Reagenzchemikalien.

**Zusammensetzung/Angaben zu Bestandteilen**

2-Methoxyethanol 109-86-4

Essigsäure 64-19-7

Salzsäure 7647-01-0

**Signalwort****GEFAHR**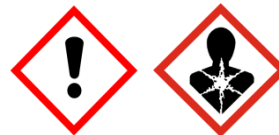

Nur USA

USA und EU

**Erklärungen zu Gefahren****Verursacht Hautreizungen****Verursacht schwere Augenreizungen****Kann zu Reizungen der Atemwege führen****Kann zu Schläfrigkeit oder Benommenheit führen****Kann die Fruchtbarkeit beeinträchtigen. Kann das Kind im Mutterleib schädigen****Kann Organe bei längerer oder wiederholter Exposition schädigen****Sicherheitshinweise****Prävention****Vor Gebrauch besondere Anweisungen einholen****Vor Gebrauch alle Sicherheitshinweise lesen und verstehen****Vorgeschriebene persönliche Schutzausrüstung verwenden****Gesicht, Hände und Haut nach Kontakt bei der Handhabung gründlich waschen****Schutzbrille/Gesichtsschutz tragen****Staub/Rauch/Gas/Nebel/Dämpfe/Spray nicht einatmen****Nur im Freien oder in gut durchlüfteten Bereichen verwenden****Reaktion****Bei Exposition oder falls betroffen: Ärztlichen Rat einholen/ärztliche Hilfe hinzuziehen****Einatmen****NACH EINATMEN: Betroffene Person an die frische Luft bringen und in einer bequemen, die Atmung unterstützenden Position ruhig halten.****Haut****BEI HAUTKONTAKT: Mit viel Wasser und Seife abwaschen****Bei Hautreizungen: Ärztlichen Rat einholen/ärztliche Hilfe hinzuziehen****Kontaminierte Kleidung ausziehen und vor dem Wiederverwenden waschen.****Augen****BEI AUGENKONTAKT: Behutsam mehrere Minuten lang mit Wasser****spülen. Kontaktlinsen, falls vorhanden und ohne Probleme möglich, herausnehmen. Spülen der Augen fortsetzen.****Bei anhaltender Augenreizung: Ärztlichen Rat einholen/ärztliche Hilfe hinzuziehen****Lagerung****Verschlotten lagern****An einem gut belüfteten Ort aufbewahren. Den Behälter dicht geschlossen halten****Entsorgung****Inhalt/Behälter bei einer zugelassenen Abfallentsorgungsanlage entsorgen****Nicht anderweitig klassifizierte Gefahren****Keine identifiziert****WARNUNG! Dieses Produkt enthält eine Chemikalie, von der dem Staat Kalifornien bekannt ist, dass sie Geburtsfehler oder andere reproduktive Schäden verursacht.****Notrufnummer****INFOTRAC – 24 Stunden erreichbar: 1-800-535-5053****Rufnummer außerhalb der USA – 24 Stunden erreichbar: 001-352-323-3500 (R-Gespräch)****LAGERUNG**

Das RapID ANA II System und das RapID Spot-Indol-Reagenz sollten vor dem Gebrauch im Originalbehälter bei 2-8°C gelagert werden. vor Gebrauch Panel und Reagenzien auf Raumtemperatur bringen. KEIN AUSTAUSCH zwischen Reagenzien verschiedener RapID Systeme. Nur die Anzahl der für den Test benötigten Panel aus der Packung entfernen. Den Plastikbeutel erneut versiegeln und sofort wieder bei einer Temperatur von 2-8°C aufbewahren. Panel müssen an demselben Tag

## GERMAN

verwendet werden, an dem sie aus der Verpackung genommen wurden. Die RapID Inokulationsflüssigkeit bis zum Gebrauch im Originalbehälter bei Raumtemperatur (20 bis 25°C) lagern.

### QUALITÄTSBEEINTRÄCHTIGUNG

Dieses Produkt nicht verwenden, wenn (1) sich die Farbe des Reagenzes verändert hat, (2) das Verfallsdatum überschritten ist, (3) das Panel zerbrochen oder die Schutzfolie beschädigt ist oder (4) irgendwelche anderen Anzeichen von Beeinträchtigung vorhanden sind.

### PROBENGEWINNUNG-LAGERUNG UND -TRANSPORT

Die Proben sollten entsprechend den empfohlenen Richtlinien gewonnen und gehandhabt werden.<sup>19,20</sup>

### PACKUNGSINHALT

(1) 20 RapID ANA II Panel, (2) 20 Protokollblätter, (3) RapID ANA II Reagenz (ein Plastikfläschchen mit Tropfpipette, enthält ausreichend Reagenz für 20 Panel), (4) 2 Inkubationsbehälter aus Pappe, (5) Gebrauchsanweisung (IFU).

### Inhaltssymbole

|                         |                            |
|-------------------------|----------------------------|
| <b>ANA II Panels</b>    | ANA II-Panels              |
| <b>Report Forms</b>     | Berichtsformulare zu RapID |
| <b>ANA II Reagent</b>   | ANA II-Reagenz             |
| <b>Incubation Trays</b> | Inkubatoreinschübe         |

### ZUSÄTZLICH BENÖTIGTES MATERIAL (NICHT IN DER PACKUNG ENTHALTEN)

(1) Gasbrenner, (2) Impföse, Tupfer, Sammelbehälter, (3) Brutschränke, alternative Einrichtung, (4) Supplementierte Medien, (5) Qualitätskontrollorganismen, (6) Gramfärbungsreagenzien, (7) Objektträger, (8) Baumwolltupfer, (9) RapID Inokulationsflüssigkeit-1°ml (R8325102), (10) McFarland-Trübungsstandard Nr. 3 oder Äquivalent (R20413), (11) Pipetten, (12) RapID Spot-Indol-Reagenz (R8309002), (13) ERIC (Elektronisches RapID Kompendium, R8323600).

**Tabelle 1 - Testprinzipien und Komponenten des RapID ANA II Systems**

| Vertiefung Nr.                          | Testcode        | Reaktiver Bestandteil                   | Menge  | Prinzip                                                                                                                                  | Bibliographie nr. |
|-----------------------------------------|-----------------|-----------------------------------------|--------|------------------------------------------------------------------------------------------------------------------------------------------|-------------------|
| <b>Vor dem Hinzufügen von Reagenz:</b>  |                 |                                         |        |                                                                                                                                          |                   |
| 1                                       | URE             | Harnstoff                               | 0,4 %  | Hydrolyse von Harnstoff erzeugt basische Produkte, die den pH-Wert erhöhen und den Indikator ändern.                                     | 1-3               |
| 2                                       | BLTS            | p-Nitrophenyl-β,D-Disaccharid           | 0,1 %  |                                                                                                                                          |                   |
| 3                                       | αARA            | p-Nitrophenyl-α,D-Arabinosid            | 0,1 %  |                                                                                                                                          |                   |
| 4                                       | ONPG            | p-Nitrophenyl-β,D-Galactosid            | 0,1 %  |                                                                                                                                          |                   |
| 5                                       | αGLU            | p-Nitrophenyl-α, D-Glukosid             | 0,1 %  | Enzymatische Hydrolyse von farblosem arylsubstituiertem Glykosid oder Phosphorester setzt gelbes σ- oder p-Nitrophenol frei.             | 4-8               |
| 6                                       | βGLU            | p-Nitrophenyl-β, D-Glukosid             | 0,08 % |                                                                                                                                          |                   |
| 7                                       | αGAL            | p-Nitrophenyl-α, D-Galactosid           | 0,08 % |                                                                                                                                          |                   |
| 8                                       | αFUC            | p-Nitrophenyl-α, L-Fucosid              | 0,08 % |                                                                                                                                          |                   |
| 9                                       | NAG             | p-Nitrophenyl-n-Acetyl-β,D-Glucosaminid | 0,1 %  |                                                                                                                                          |                   |
| 10                                      | PO <sub>4</sub> | p-Nitrophenylphosphat                   | 0,1 %  |                                                                                                                                          |                   |
| <b>Nach dem Hinzufügen von Reagenz:</b> |                 |                                         |        |                                                                                                                                          |                   |
| 3                                       | LGY             | Leucyl-Glycin-β-Naphthylamid            | 0,08 % | Enzymatische Hydrolyse von Arylamid-Substrat setzt ungebundenes β-Naphthylamin frei, das mit dem RapID ANA II Reagenz nachgewiesen wird. | 6, 8-14           |
| 4                                       | GLY             | Glycin-β-Naphthylamid                   | 0,08 % |                                                                                                                                          |                   |
| 5                                       | PRO             | Prolin-β-Naphthylamid                   | 0,08 % |                                                                                                                                          |                   |
| 6                                       | PAL             | Phenylalanin-β-Naphthylamid             | 0,05 % |                                                                                                                                          |                   |
| 7                                       | ARG             | Arginin-β-Naphthylamid                  | 0,05 % |                                                                                                                                          |                   |
| 8                                       | SER             | Serin-β-Naphthylamid                    | 0,08 % |                                                                                                                                          |                   |
| 9                                       | PYR             | Pyrrolidonyl-β-Naphthylamid             | 0,08 % | Verwendung des Substrats führt zur Bildung von Indol, das mit dem RapID Spot-Indol-Reagenz nachgewiesen wird.                            | 15, 16            |
| 10                                      | IND             | Tryptophan                              | 0,01 % |                                                                                                                                          |                   |



**TESTDURCHFÜHRUNG  
VORBEREITUNG DES INOKULUMS**

1. Testorganismen müssen anaerob in Reinkultur gewachsen und vor dem Einsatz im IDS RapID System mittels Gramfärbung untersucht werden.
2. Die Testorganismen können von einer Vielzahl selektiver und nichtselektiver Agar-Nährmedien stammen. Die folgenden Medienarten werden empfohlen:

Nichtselektive Medien: CDC Anaerobic Blood Agar; 5-7% Schafblutagar mit Brucella, Columbiaagar, Brain Heart Infusion, Lombard-Dowell oder Tryptic Soy Base.

Differenzierungs- oder Selektivmedien: Phenylethyl Alcohol (PEA) Agar; Egg Yolk Agar (EYA); Paromomycin/Vancomycin (PV) Agar; Kanamycin/Vancomycin (KV) Agar.

**Hinweise:**

- „Reduzierende Bestandteile enthalten, sollten Palladiumchlorid oder andere reduzierende Bestandteile enthalten, sollten NICHT verwendet werden, da sie sich auf einige enzymatische Prozesse störend auswirken können.
  - Kanamycin Galle Aesculin(KBE) Agar und Bacteroides Galle Aesculin (BBE) Agar werden NICHT empfohlen, da sich der möglicherweise gebildete Eisen Aesculetin-Komplex störend auf die Testinterpretation auswirken kann.
  - Einige Medien, die (zugesetzte) Mono- oder Disaccharide enthalten, werden NICHT empfohlen, da sie die Glykolyseaktivität unterdrücken und dadurch die Testaktivität reduzieren können. Die meisten Formulierungen von Schaedler-Agar enthalten genügend Dextrose, um die Glykosidaseaktivität zu stören.
  - Die zu identifizierenden Kulturisolate sollten weniger als 72 Stunden (vorzugsweise 18 bis 24 Stunden) alt sein.
  - Die Verwendung anderer als der empfohlenen Medien kann die Testleistung beeinträchtigen.
3. Mit Hilfe eines Baumwolltupfers oder einer Impföse eine ausreichende Menge Kulturmaterial in die RapID Inokulationsflüssigkeit (1 ml) suspendieren, bis eine Suspension der Testorganismen erzielt ist, die dem McFarland-Trübungsstandard Nr. 3 (oder einem äquivalenten Standard) entspricht.

**Hinweise:**

- Suspensionen, die deutlich weniger trüb sind als ein McFarland-Standard Nr. 3, führen zu fehlerhaften Reaktionen.
  - Bakterielle Suspensionen, die **etwas** trüber sind als ein McFarland-Standard Nr. 3, beeinträchtigen die Testleistung nicht und werden für Gebrauchskulturen und Qualitätskontrollstämmen empfohlen. Suspensionen mit einer Trübung, die weit über dem McFarland-Standard Nr. 3 liegt, beeinträchtigen jedoch die Testleistung.
  - Suspensionen gründlich mischen, bei Bedarf im Vortex.
  - Suspensionen innerhalb von 15 Minuten nach der Herstellung verwenden.
4. Eine Agarplatte kann mit einer Impföse voll Testsuspension aus dem Inokulationsröhrchen für Reinheits- und andere zusätzlich erforderliche Tests inokuliert werden. Die Platte mindestens 18 bis 24 Stunden bei 35 bis 37°C anaerob inkubieren.

**INOKULATION DES RAPID ANA II PANELS**

1. Anheben der Schutzfolie des Panels an der markierten Stelle „Peel to Inoculate“ und nach oben und nach links ziehen.
2. Mit Hilfe einer Pipette den **gesamten** Inhalt des Inokulationsflüssigkeitsröhrchens vorsichtig in die obere rechte Ecke des Panels einbringen. Die Inokulationsöffnung des Panels wieder mit der zuvor abgezogenen Schutzfolie verschließen.
3. Nach Zugabe der Testsuspension die Vorderseite des Panels mit den Testvertiefungen bis zu einem Winkel von etwa 45° anheben, während die Rückseite mit der Inokulationsmulde auf die Arbeitsplatte gestützt bleibt (siehe Abbildung).

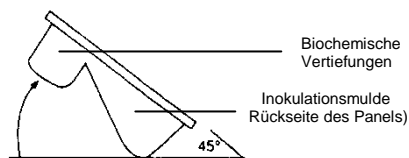

4. Panel weiterhin im gleichen Winkel geneigt halten und die linke und rechte Seite abwechselnd vorsichtig anheben (wie unten abgebildet), damit sich das Inokulum gleichmäßig auf die hinteren Vertiefungen verteilt.

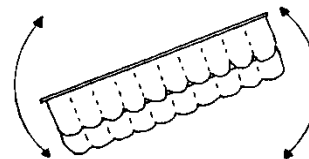

5. Panel auf die Arbeitsplatte setzen und - während die Vorderseite des Panels mit den Reaktionsvertiefungen horizontal auf die Arbeitsplatte gestützt bleibt - die Rückseite mit der Inokulationsmulde langsam bis zu einem Winkel von etwa 45° anheben, bis das Inokulum über die Strömungsverteilung in die Reaktionsvertiefungen fließt (siehe Abbildung). Hierdurch sollte das gesamte Inokulum aus dem hinteren Teil des Panels entfernt werden.

**Hinweis:** Wenn das Panel zu schnell geneigt wird, können sich Luftblasen am Übergang zu den Testvertiefungen bilden, die den Flüssigkeitsstrom behindern.

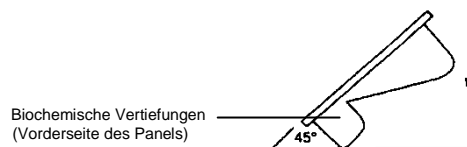

6. Panel wieder in horizontale Position bringen. Falls erforderlich, mit dem Panel vorsichtig auf die Arbeitsplatte klopfen, um in den Vertiefungen befindliche Luftblasen zu entfernen.

**Hinweise:**

- Testvertiefungen untersuchen. Sie sollten keine Luftblasen aufweisen und gleichmäßig gefüllt sein. Leichte Unterschiede im Füllstand der Testvertiefungen sind akzeptabel; sie beeinträchtigen die Testleistung nicht. Wenn das Panel völlig ungleichmäßig gefüllt ist, sollte ein neues Panel inokuliert und das falsch gefüllte entsorgt werden.
- Die Inokulation eines Panels mit Inokulationsflüssigkeit abschließen, bevor ein weiteres Panel inokuliert wird.
- Das Inokulum darf nicht über einen längeren Zeitraum im rückwärtigen Teil des Panels verbleiben, ohne den Vorgang zu beenden.

**INKUBATION DER RAPID ANA II PANEL**

Inokulierte Panel mindestens 4 aber nicht mehr als 6 Stunden bei einer Temperatur von 35 bis 37°C in einem Brutschrank (ohne CO<sub>2</sub>-Zufuhr) inkubieren. Die Panel können in den mit dem Kit gelieferten Inkubationsbehälter inkubiert werden (dies erleichtert die Handhabung).

**Hinweis:** Wenn gewünscht, können RapID ANA II Panel nach einer Inkubationszeit von 4 bis 6 Stunden und vor dem Zusatz jeglicher Reagenzien über Nacht im Kühlschrank (bei 2-8°C) gelagert und am nächsten Morgen ausgewertet werden.

**AUSWERTUNG DER RAPID ANA II PANEL**

Die RapID ANA II Panel enthalten 10 Reaktionsvertiefungen, in denen 18 verschiedene Reaktionen ablaufen. Die Testvertiefungen 3 bis 10 sind bifunktional, es werden zwei separate Tests in der gleichen Vertiefung durchgeführt. Bei bifunktionalen Tests wird das erste Testergebnis vor Zugabe eines Reagenzes beurteilt, anschließend wird ein Reagenz in die bifunktionalen Gefäße getropft und das zweite Testergebnis beurteilt. Auf den RapID ANA II Panels wird bei den bifunktionalen Testvertiefungen 3 bis 9, die die Zugabe des RapID ANA II Reagenzes erfordern, der erste Test jeweils über der Trennlinie und der zweite Test unter der Trennlinie angegeben. Beim bifunktionalen Test 10, der mit RapID Spot-Indol-Reagenz durchgeführt wird, ist der Test, der das Reagenz erfordert, durch eine Umrandung markiert.

**Testpositionen beim RapID ANA II Panel**

| Vertiefung | 1   | 2    | 3    | 4    | 5    | 6    | 7    | 8    | 9   | 10              |
|------------|-----|------|------|------|------|------|------|------|-----|-----------------|
| Testcode   | URE | BLTS | αARA | ONPG | αGLU | βGLU | αGAL | αFUC | NAG | PO <sub>4</sub> |
|            |     |      | LGY  | GLY  | PRO  | PAL  | ARG  | SER  | PYR | <b>IND</b>      |

1. Das RapID ANA II Panel auf die Arbeitsplatte stellen und die Schutzfolie über den Reaktionsvertiefungen abziehen. Hierzu die untere rechte Seite nach oben und nach links ziehen.
2. Vor der Zugabe jeglicher Reagenzien das Ergebnis der Vertiefungen 1 (URE) bis 10 (PO<sub>4</sub>) von links nach rechts mit Hilfe der Interpretationshinweise in Tabelle 2 ablesen. Die Testergebnisse in die entsprechenden Felder der Protokollblätter eintragen (bei den bifunktionalen Tests den Testcode über der Trennlinie ablesen).
3. 2 Tropfen RapID Spot-Indol-Reagenz in Vertiefung 10 (IND) einbringen.

**Hinweis:** Nur RapID Spot-Indol-Reagenz verwenden. Kovacs oder Ehrlichs Indol Reagenz ergibt keine zufriedenstellenden Ergebnisse.

- 2 Tropfen RapID ANA II Reagenz in die Vertiefungen 3 (LGY) bis 9 (PYR) einbringen.
- Mindestens 30 Sekunden, aber nicht länger als 2 Minuten, auf die Farbveränderung warten. Die Testergebnisse der Vertiefungen 3 bis

10 ablesen. Die Ergebnisse in die entsprechenden Felder der Protokollblätter eintragen (bei den bifunktionalen Tests den Testcode unter) der Trennlinie verwenden.

- Zur Identifikation den Mikrocode auf dem Reportformular aus dem ERIC referenzieren.

**Tabelle 2 - Interpretation der Tests mit dem RapID ANA II System\***

| Vertiefung Nr.                          | Testcode        | Reagenz                  | Reaktion                             |                                    | Bemerkungen                                                                                               |
|-----------------------------------------|-----------------|--------------------------|--------------------------------------|------------------------------------|-----------------------------------------------------------------------------------------------------------|
|                                         |                 |                          | Positiv                              | Negativ                            |                                                                                                           |
| <b>Vor dem Hinzufügen von Reagenz:</b>  |                 |                          |                                      |                                    |                                                                                                           |
| 1                                       | URE             | Keine Reagenzienzugabe   | rot oder urpur                       | gelb bis orange                    | Orangefarbene und rot-orangefarbene Farbtöne sollten als negativ bewertet werden.                         |
| 2                                       | BLTS            | Kein Reagenzienzugabe    | mittel- oder hellgelb                | klar, beige oder sehr blasses Gelb | Nur bei einer eindeutige Farbentwicklung nach gelb handelt es sich um einen positiven Test.               |
| 3                                       | αARA            |                          |                                      |                                    |                                                                                                           |
| 4                                       | ONPG            |                          |                                      |                                    |                                                                                                           |
| 5                                       | αGLU            |                          |                                      |                                    |                                                                                                           |
| 6                                       | βGLU            |                          |                                      |                                    |                                                                                                           |
| 7                                       | αGAL            |                          |                                      |                                    |                                                                                                           |
| 8                                       | αFUC            |                          |                                      |                                    |                                                                                                           |
| 9                                       | NAG             |                          |                                      |                                    |                                                                                                           |
| 10                                      | PO <sub>4</sub> |                          |                                      |                                    |                                                                                                           |
| <b>Nach dem Hinzufügen von Reagenz:</b> |                 |                          |                                      |                                    |                                                                                                           |
| 3                                       | LGY             | RapID ANA II Reagenz     | purpur, violett, rot oder dunkelrosa | gelb, orange oder hellrosa         | Eine Farbentwicklung sollte zwischen 30 Sekunden und 2 Minuten eintreten.                                 |
| 4                                       | GLY             |                          |                                      |                                    |                                                                                                           |
| 5                                       | PRO             |                          |                                      |                                    |                                                                                                           |
| 6                                       | PAL             |                          |                                      |                                    |                                                                                                           |
| 7                                       | ARG             |                          |                                      |                                    |                                                                                                           |
| 8                                       | SER             |                          |                                      |                                    |                                                                                                           |
| 9                                       | PYR             |                          |                                      |                                    |                                                                                                           |
| 10                                      | IND             | RapID Spot-Indol-Reagenz | blau oder blaugrün                   | Alle anderen Farben                | Alle blauen oder blaugrünen Farbtöne sollten unabhängig von ihrer Intensität als positiv bewertet werden. |

**HINWEIS:** Die Ergebnisse sollten von oben und über einem weißen Hintergrund abgelesen werden.

**ERGEBNISSE UND BEREICH DER ERWARTETEN WERTE**

Die RapID ANA II Differenzierungstabellen illustrieren die beim RapID ANA II System erwarteten Ergebnisse. Die Ergebnisse in den Differenzierungstabellen werden durch eine Reihe positiver Prozentwerte für die einzelnen Systemtests ausgedrückt. Diese Informationen bieten die statistische Unterstützung für die Verwendung der einzelnen Tests und - durch numerische Codierung der digitalen Testergebnisse - die Basis für einen wahrscheinlichkeitstheoretischen Ansatz zur Identifizierung des Testisolats.

Identifizierungen werden erzielt, indem die individuellen Testergebnisse von den RapID ANA II Panelzusammen mit anderen Laborinformationen (z. B. Gramfärbung, Aerotoleranz, Wachstum auf Differenzierungs- oder Selektivmedien) verwendet werden. Hierdurch wird ein Muster erzeugt, das statistisch einer bekannten Reaktivität für Taxa in der RapID System-Datenbank entspricht. Diese Muster werden anhand der RapID ANA II Differenzierungstabellen oder durch Ableitung eines Mikrocodes und Verwendung des RapID ANA II Code-Kompendiums bzw. von ERIC verglichen.

**QUALITÄTSKONTROLLE**

Alle Lotnummern des RapID ANA II Systems wurden unter Verwendung der folgenden Qualitätskontrollorganismen getestet und als akzeptabel befunden. Das Testen von Kontrollorganismen sollte in Übereinstimmung mit etablierten Laborverfahren zur Qualitätskontrolle durchgeführt werden. Im Fall von fehlerhaften Qualitätskontrollergebnissen sollten die

Patientenergebnisse nicht berichtet werden. In Tabelle 3 sind die erwarteten Ergebnisse für eine ausgewählte Reihe von Testorganismen aufgelistet.

**Hinweise:**

- Die Qualitätskontrolle für RapID Reagenzien ist erfolgreich, wenn die erwarteten Reaktionen bei Tests eintreten, die den Zusatz von Reagenzien erfordern (Vertiefungen 3 bis 10).
- Organismen, die über einen längeren Zeitraum wiederholt auf Nährmedien gebracht wurden, können zu fehlerhaften Ergebnissen führen.
- Qualitätskontrollstämmen sollten tiefgefroren oder lyophilisiert gelagert werden. Vor dem Gebrauch sollten zur Qualitätskontrolle verwendete Stämme zwei- bis dreimal aus der Lagerung auf ein Nährmedium übertragen werden, das zur Verwendung mit dem RapID ANA II System empfohlen wird.
- Formulierungen, Zusätze und Bestandteile der Nährmedien sind von Hersteller zu Hersteller unterschiedlich und können selbst von Charge zu Charge verschieden sein. Aus diesem Grund können Nährmedien die enzymatische Aktivität der Komponenten der für die Qualitätskontrolle bestimmten Stämme beeinflussen. Wenn die Ergebnisse der Qualitätskontrollstämmen von den angegebenen Mustern abweichen, kann dieses Problem oft durch eine Subkultur auf einem Medium aus einer anderen Charge oder von einem anderen Hersteller gelöst werden.

**Tabelle 3 - Qualitätskontrolltabelle für den RapID ANA II Panel**

| Organismen                                                   | Vor dem Hinzufügen von Reagenz |      |      |      |      |      |      |      |     |                 | Nach dem Hinzufügen von RapID ANA II Reagenz |     |     |     |     |     |     | Spot-Indol |
|--------------------------------------------------------------|--------------------------------|------|------|------|------|------|------|------|-----|-----------------|----------------------------------------------|-----|-----|-----|-----|-----|-----|------------|
|                                                              | URE                            | BLTS | αARA | ONPG | αGLU | βGLU | αGAL | αFUC | NAG | PO <sub>4</sub> | LGY                                          | GLY | PRO | PAL | ARG | SER | PYR |            |
| <i>Clostridium sordellii</i> <sup>a</sup><br>ATCC® 9714      | +                              | -    | -    | -    | -    | -    | -    | V    | -   | -               | -                                            | V   | +   | V   | V   | V   | V   | +          |
| <i>Parabacteroides distasonis</i> <sup>a</sup><br>ATCC® 8503 | -                              | +    | V    | +    | +    | +    | +    | -    | +   | +               | +                                            | +   | -   | +   | +   | +   | +   | -          |
| <i>Bacteroides uniformis</i><br>ATCC® 8492                   | -                              | +    | +    | +    | +    | +    | +    | +    | +   | +               | +                                            | +   | -   | -   | -   | -   | -   | +          |

+, positiv; -, negativ; V, variabel

<sup>a</sup>Die wichtigsten Indikatorstämmen zeigen eine ausreichende Leistung des labilsten Substrates im System sowie eine Reaktivität in einer erheblichen Anzahl der Vertiefungen, entsprechend den Empfehlungen des Clinical and Laboratory Standards Institute für eine straffe Qualitätssicherung.<sup>36</sup>

RapID ANA II Differenzierungstabelle: Cocci

| Organism                                           | URE | BLTS | αARA | ONPG | αGLU | βGLU | αGAL | αFUC | NAG | PO <sub>4</sub> | LGY | GLY | PRO | PAL | ARG | SER | PYR | IND |
|----------------------------------------------------|-----|------|------|------|------|------|------|------|-----|-----------------|-----|-----|-----|-----|-----|-----|-----|-----|
| <i>Anaerococcus hydrogenalis</i> <sup>a</sup>      | 0   | 0    | 0    | 0    | 98   | 0    | 0    | 0    | 0   | 2               | 9   | 14  | 2   | 1   | 65  | 2   | 96  | 99  |
| <i>Anaerococcus prevotii</i> <sup>b</sup>          | 2   | 0    | 0    | 0    | 9    | 1    | 0    | 0    | 0   | 9               | 11  | 21  | 11  | 16  | 96  | 68  | 2   | 0   |
| <i>Anaerococcus tetradius</i> <sup>c</sup>         | 88  | 5    | 0    | 12   | 88   | 16   | 5    | 0    | 0   | 0               | 33  | 96  | 0   | 88  | 97  | 90  | 61  | 0   |
| <i>Blautia producta</i> <sup>d</sup>               | 0   | 51   | 0    | 99   | 99   | 96   | 56   | 0    | 52  | 0               | 0   | 2   | 0   | 2   | 9   | 6   | 0   | 0   |
| <i>Finexgoldia magna</i> <sup>e</sup>              | 0   | 0    | 0    | 0    | 2    | 0    | 0    | 0    | 2   | 6               | 95  | 96  | 2   | 82  | 98  | 95  | 98  | 0   |
| <i>Gemella morbillorum</i> <sup>f</sup>            | 0   | 0    | 0    | 18   | 80   | 1    | 0    | 0    | 0   | 68              | 71  | 73  | 88  | 93  | 99  | 98  | 4   | 0   |
| <i>Micromonas micros</i> <sup>g</sup>              | 0   | 0    | 0    | 0    | 4    | 0    | 0    | 0    | 5   | 93              | 95  | 98  | 92  | 88  | 98  | 96  | 86  | 0   |
| <i>Peptoniphilus asaccharolyticus</i> <sup>h</sup> | 0   | 0    | 0    | 0    | 3    | 1    | 0    | 0    | 0   | 4               | 11  | 22  | 5   | 20  | 96  | 21  | 8   | 99  |
| <i>Peptoniphilus indolicus</i> <sup>i</sup>        | 0   | 2    | 0    | 0    | 0    | 0    | 0    | 0    | 0   | 99              | 28  | 76  | 0   | 81  | 91  | 98  | 0   | 99  |
| <i>Peptostreptococcus anaerobius</i>               | 0   | 0    | 0    | 0    | 96   | 0    | 0    | 0    | 2   | 0               | 0   | 8   | 92  | 16  | 68  | 18  | 0   | 0   |
| <i>Staphylococcus saccharolyticus</i>              | 21  | 0    | 0    | 0    | 0    | 0    | 0    | 0    | 0   | 18              | 0   | 0   | 0   | 0   | 0   | 0   | 0   | 0   |
| <i>Streptococcus constellatus</i>                  | 0   | 0    | 0    | 0    | 46   | 91   | 18   | 0    | 12  | 94              | 82  | 97  | 6   | 98  | 99  | 93  | 6   | 0   |
| <i>Streptococcus intermedius</i>                   | 0   | 29   | 9    | 99   | 92   | 95   | 8    | 0    | 21  | 92              | 92  | 98  | 78  | 98  | 99  | 96  | 5   | 0   |
| <i>Veillonella</i> spp. <sup>l</sup>               | 0   | 0    | 0    | 0    | 4    | 0    | 0    | 0    | 0   | 59              | 2   | 9   | 1   | 5   | 38  | 16  | 83  | 0   |

<sup>a</sup>Frühere Bezeichnung *Peptostreptococcus hydrogenalis*  
<sup>b</sup>Frühere Bezeichnung *Peptostreptococcus prevotii*  
<sup>c</sup>Frühere Bezeichnung *Peptostreptococcus tetradius*  
<sup>d</sup>Frühere Bezeichnung *Peptostreptococcus productus*  
<sup>e</sup>Frühere Bezeichnung *Peptostreptococcus magnus*

<sup>f</sup>Frühere Bezeichnung *Streptococcus morbillorum*  
<sup>g</sup>Frühere Bezeichnung *Peptostreptococcus micros*  
<sup>h</sup>Frühere Bezeichnung *Peptostreptococcus asaccharolyticus*  
<sup>i</sup>Frühere Bezeichnung *Peptostreptococcus indolicus*  
<sup>l</sup>Besteht aus drei Spezies aus klinischen Humanspezimen: *V. parvula*, *V. dispar* und *V. atypica*.

**EINSCHRÄNKUNGEN**

- Die Nutzung des RapID ANA II Systems und die Auslegung der Ergebnisse erfordern die Kenntnisse eines qualifizierten Laboranten, der in allgemeinen mikrobiologischen Methoden ausgebildet ist und der seine Ausbildung und Erfahrung sowie Informationen über die Proben und andere relevante Verfahren mit Bedacht einsetzt, bevor er einen Bericht über die mithilfe des RapID ANA II Systems erhaltene Identifikation erstellt.
- Bei der Verwendung des RapID ANA II Systems sollte den Faktoren Speziesherkunft, Aerotoleranz, Gramfärbungsmerkmale und Wachstum auf selektiven Agarmedien Aufmerksamkeit geschenkt werden.
- Das RapID ANA II System muss mit Testorganismen aus Reinkulturen verwendet werden. Die Verwendung von Mischkulturen oder von Direkttests an klinischem Material führen zu fehlerhaften Ergebnissen.
- Das RapID ANA II System ist zur Verwendung mit den in den RapID ANA II Differenzierungstabellen aufgeführten Taxa gedacht. Die Verwendung von Organismen, die nicht speziell aufgelistet sind, kann zu Fehlidentifizierungen führen.
- Die für Tests mit dem RapID ANA II System aufgelisteten erwarteten Werte können sich von konventionellen Testergebnissen oder früher berichteten Informationen unterscheiden.
- Die Genauigkeit des RapID ANA II Systems basiert auf der statistischen Verwendung einer Multiplizität speziell entworfener Tests und einer exklusiven, urheberrechtlich geschützten Datenbank. Die Verwendung jedes einzelnen der im RapID ANA II System enthaltenen Tests zur Identifizierung eines Testisolats unterliegt nur dem im betreffenden Test inhärenten Fehler.

**LEISTUNGSDATEN**

Die Leistungsdaten für das RapID ANA II System wurden durch Labortests mit Referenz- und Gebrauchskulturen ermittelt.<sup>5,10,21-35</sup>

**BIBLIOGRAPHIE**

- Blazevic, D.J. and G.M. Ederer. 1975. Principles of Biochemical Tests in Diagnostic Microbiology. John Wiley & Sons, New York, NY.
- Dowell, V.R., Jr. and T.M. Hawkins. 1977. Laboratory Methods in Anaerobic Bacteriology, CDC Laboratory Manual. U.S. Dept. of H.H.S. CDC, Atlanta, GA.
- Holdeman, L.V., E.P. Cato, and W.E.C. Moore. 1977. Anaerobe Laboratory Manual. 4<sup>th</sup> ed. Virginia Polytechnic Institute and State University, Blacksburg, VA.
- Barnes, E.H. and J.F. Morris. 1957. J. Bacteriol. 73:100-104.
- Dellinger, C.A. and L.V. Moore. 1986. J. Clin. Microbiol. 23:289-293.
- Guilbault, G.G. 1970. Enzymatic Methods of Analysis. p. 43-51. Pergamon Press, New York, NY.
- Kilian, M. and P. Bulow. 1976. Acta. Pathol. Microbiol. Scand. B. 84:245-251.
- Tharagotnet, D., P.R. Sisson, C.M. Roxby, H.R. Ingham, and J.B. Selkon. 1977. J. Clin. Pathol. 30:505-509.
- Bodansky, O. and A.L. Latner. 1975. Advances in Clinical Chemistry. Vol. 17, p. 53-61. Academic Press, New York, NY.
- Celig, D.M. and P.C. Schreckenberger. 1991. J. Clin. Microbiol. 29:457-462.
- Nagatsu, T., M. Hino, H. Fuyamada, T. Hayakawa, S. Sakakibara, Y. Nakagawa, and T. Takemoto. 1976. Anal. Biochem. 74:466-476.
- Norris, J.R. and D.W. Ribbons. 1976. Methods in Microbiology. Vol. 9, p. 1-14. Academic Press, New York, NY.
- Peterson, E.H. and E.J. Hsu. 1978. J. Food Sci. 43:1853-1856.
- Westley, J.R., P.J. Anderson, V.A. Close, B. Halpern, and E.M. Lederberg. 1967. Appl. Microbiol. 15:822-825.
- Fay, G.D. and A.L. Barry. 1974. Appl. Microbiol. 15:822-825.
- Sutter, V.L. and W.T. Carter. 1972. J. Clin. Pathol. 58:335-339.
- Holdeman, L.V., E.P. Cato, and W.E.C. Moore. 1987. Anaerobe Laboratory Manual Update. Supplement to the 4<sup>th</sup> ed. Virginia Polytechnic Institute and State University, Blacksburg, VA.
- Summanen, P., E.J. Baron, D.M. Citron, C.A. Strong, H.M. Wexler, and S.M. Finegold. 1993. Wadsworth Anaerobic Bacteriology Manual. 5<sup>th</sup> ed. Star Publishing Company, Belmont, CA.
- Murray, P.R., E.J. Baron, J.H. Jorgensen, M.L. Landry, and M.A. Pfaller. 2007. Manual of Clinical Microbiology. 9<sup>th</sup> ed. ASM Press, Washington, D.C.

- Forbes, B.A., D.F. Sahn, and A.S. Weissfeld. 2007. Bailey and Scott's Diagnostic Microbiology. 12<sup>th</sup> ed. Mosby Elsevier, St. Louis, MO.
- Alexander, C.J., D.M. Citron, S. Hunt Gerardo, M.C. Claros, D. Talan, and E.J. Goldstein. 1997. J. Clin. Microbiol. 35:406-411.
- Appelbaum, P.C., C.S. Kaufman, J.C. Keifer, and J.J. Venbrux. 1984. J. Clin. Microbiol. 18:615-621.
- Appelbaum, P.C., J.W. Depenbusch, and C.S. Kaufman. 1984. Abstract C-153. Abstracts of the 84<sup>th</sup> General Meeting of the American Society for Microbiology. ASM, Washington, D.C.
- Burdash, N.M., K.A. Corey, P.J. Fortuna, M.L. Beasley, E.R. Bannister, and J.P. Manos. 1984. Abstract C-150. Abstracts of the 84<sup>th</sup> General Meeting of the American Society for Microbiology. ASM, Washington, D.C.
- Hamilton, L.T., C. Ayer, and D.N. Wright. 1985. Abstract C-159. Abstracts of the 85<sup>th</sup> General Meeting of the American Society for Microbiology. ASM, Washington, D.C.
- Hansen, S.L. and W.A. Pope. 1984. Abstract C-147. Abstracts of the 84<sup>th</sup> General Meeting of the American Society for Microbiology. ASM, Washington, D.C.
- Hudspeth, M.K., S. Hunt Gerardo, M.F. Maiden, D.M. Citron, and E.J. Goldstein. 1999. J. Clin. Microbiol. 37:2003-2006.
- Kaplan, R.L., M.J. O'Brian, and W. Landua. 1985. Abstract C-163. Abstracts of the 85<sup>th</sup> General Meeting of the American Society for Microbiology. ASM, Washington, D.C.
- Karachewski, N.O., E.L. Busch, and C.L. Wells. 1984. Abstract C-148. Abstracts of the 84<sup>th</sup> General Meeting of the American Society for Microbiology. ASM, Washington, D.C.
- Mangels, J., D. Berkley, and S. Wood. 1984. Abstract C-152. Abstracts of the 84<sup>th</sup> General Meeting of the American Society for Microbiology. ASM, Washington, D.C.
- Marler, L.M., J.A. Sider, L.C. Wolters, Y. Pettigrew, B.L. Skitt, and S.D. Allen. 1991. J. Clin. Microbiol. 29:874-878.
- Morgenstern, F. 1984. Abstract C-154. Abstracts of the 84<sup>th</sup> General Meeting of the American Society for Microbiology. ASM, Washington, D.C.
- Niles, A.C. and P.R. Murray. 1985. Abstract C-161. Abstracts of the 85<sup>th</sup> General Meeting of the American Society for Microbiology. ASM, Washington, D.C.
- Ristow K.L., P.C. Schreckenberger, D.M. Celig, M.A. Ulanday, and L.J. LeBeau. 1984. Abstract C-151. Abstracts of the 84<sup>th</sup> General Meeting of the American Society for Microbiology. ASM, Washington, D.C.
- Syed, S., W.J. Loesche, and C. Pearson. 1984. Abstract C-155. Abstracts of the 84<sup>th</sup> General Meeting of the American Society for Microbiology. ASM, Washington, D.C.
- Clinical and Laboratory Standards Institute. 2008. Quality Control for Commercial Microbial Identification Systems; Approved Guideline. M50-A. CLSI, Wayne, PA.

**ABPACKUNG**

REF R8311002, RapID ANA II System .....20 Tests/Kit

**Symbollegende**

|               |                                           |
|---------------|-------------------------------------------|
|               | Inhalt ausreichend für < n > Tests        |
| <b>REF</b>    | Katalognummer                             |
| <b>IVD</b>    | In-vitro-Diagnostikum                     |
| <b>LAB</b>    | Für Laborgebrauch                         |
|               | Gebrauchsanweisung beachten               |
|               | Temperaturbeschränkungen (Lagerungstemp.) |
| <b>LOT</b>    | Chargencode (Losnummer)                   |
|               | Verfallsdatum                             |
| <b>EC REP</b> | Autorisierte Vertretung für U-Länder      |
|               | Hersteller                                |

RapID™ ist ein Warenzeichen von Thermo Fisher Scientific und deren Tochtergesellschaften.  
 ERIC™ ist ein Warenzeichen von Thermo Fisher Scientific und deren Tochtergesellschaften.  
 ATCC™ ist ein eingetragenes Warenzeichen von American Type Culture Collection.

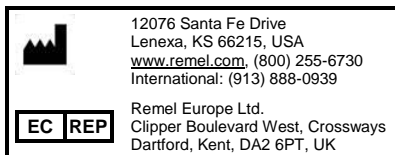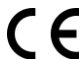

Bei technischen Fragen wenden Sie sich bitte an Ihren zuständigen Vertriebspartner.

IFU 8311002, Revision 2017-06-01

Printed in U.S.A

### RapID ANA II Differenzierungstabelle: Gramnegative Bacilli

| Organism                                            | URE | BLTS | $\alpha$ ARA | ONPG | $\alpha$ GLU | $\beta$ GLU | $\alpha$ GAL | $\alpha$ FUC | NAG | PO <sub>4</sub> | LGY | GLY | PRO | PAL | ARG | SER | PYR | IND |
|-----------------------------------------------------|-----|------|--------------|------|--------------|-------------|--------------|--------------|-----|-----------------|-----|-----|-----|-----|-----|-----|-----|-----|
| <i>Bacteroides caccae</i>                           | 0   | 79   | 98           | 99   | 88           | 96          | 99           | 97           | 99  | 99              | 96  | 91  | 5   | 75  | 98  | 72  | 0   | 0   |
| <i>Bacteroides eggerthii</i>                        | 0   | 39   | 77           | 93   | 99           | 98          | 42           | 0            | 99  | 98              | 97  | 13  | 0   | 0   | 32  | 5   | 0   | 99  |
| <i>Bacteroides fragilis</i>                         | 0   | 89   | 3            | 94   | 98           | 97          | 98           | 98           | 98  | 98              | 98  | 81  | 1   | 79  | 98  | 81  | 74  | 0   |
| <i>Bacteroides ovatus</i>                           | 0   | 95   | 96           | 88   | 98           | 95          | 98           | 93           | 99  | 98              | 96  | 84  | 0   | 0   | 3   | 2   | 0   | 99  |
| <i>Bacteroides stercoris</i>                        | 0   | 45   | 9            | 22   | 99           | 31          | 0            | 70           | 99  | 99              | 98  | 9   | 0   | 0   | 2   | 4   | 0   | 98  |
| <i>Bacteroides pyogenes</i> <sup>a</sup>            | 0   | 9    | 0            | 92   | 99           | 49          | 2            | 93           | 99  | 99              | 99  | 9   | 0   | 13  | 70  | 22  | 0   | 0   |
| <i>Bacteroides thetaiotaomicron</i>                 | 0   | 92   | 91           | 96   | 98           | 96          | 98           | 98           | 98  | 94              | 98  | 67  | 1   | 49  | 98  | 77  | 3   | 99  |
| <i>Bacteroides uniformis</i>                        | 0   | 93   | 81           | 98   | 99           | 97          | 92           | 93           | 99  | 98              | 98  | 6   | 0   | 2   | 3   | 0   | 0   | 99  |
| <i>Bacteroides vulgatus</i>                         | 0   | 3    | 85           | 95   | 99           | 0           | 99           | 99           | 99  | 95              | 98  | 82  | 4   | 1   | 85  | 52  | 84  | 0   |
| <i>Bilophila wadsworthia</i>                        | 91  | 0    | 0            | 0    | 0            | 0           | 0            | 0            | 0   | 2               | 0   | 2   | 0   | 0   | 95  | 1   | 0   | 0   |
| <i>Campylobacter gracilis</i> <sup>b</sup>          | 0   | 0    | 0            | 0    | 0            | 0           | 0            | 0            | 0   | 0               | 0   | 6   | 0   | 0   | 93  | 5   | 0   | 0   |
| <i>Campylobacter ureolyticus</i> <sup>c</sup>       | 99  | 0    | 0            | 0    | 0            | 0           | 0            | 0            | 0   | 0               | 16  | 8   | 5   | 2   | 82  | 6   | 3   | 0   |
| <i>Capnocytophaga</i> spp.                          | 0   | 42   | 0            | 89   | 96           | 86          | 2            | 1            | 78  | 76              | 99  | 99  | 90  | 99  | 99  | 95  | 13  | 0   |
| <i>Fusobacterium mortiferum</i>                     | 0   | 12   | 0            | 62   | 2            | 70          | 92           | 0            | 0   | 92              | 28  | 42  | 0   | 60  | 96  | 86  | 91  | 0   |
| <i>Fusobacterium necrophorum</i>                    | 0   | 0    | 0            | 0    | 0            | 0           | 0            | 0            | 0   | 38              | 0   | 0   | 0   | 0   | 15  | 2   | 0   | 99  |
| <i>Fusobacterium nucleatum</i>                      | 0   | 0    | 0            | 0    | 0            | 0           | 0            | 0            | 0   | 2               | 0   | 0   | 0   | 0   | 45  | 0   | 36  | 99  |
| <i>Fusobacterium varium</i>                         | 0   | 4    | 0            | 0    | 0            | 0           | 8            | 0            | 2   | 0               | 16  | 72  | 2   | 41  | 98  | 88  | 99  | 60  |
| <i>Odoribacter splanchnicus</i> <sup>d</sup>        | 0   | 8    | 4            | 95   | 0            | 8           | 93           | 92           | 99  | 73              | 91  | 14  | 9   | 34  | 99  | 84  | 99  | 99  |
| <i>Parabacteroides distasonis</i> <sup>e</sup>      | 0   | 90   | 67           | 96   | 99           | 91          | 96           | 0            | 99  | 94              | 96  | 94  | 0   | 70  | 98  | 98  | 91  | 0   |
| <i>Parabacteroides merdae</i> <sup>f</sup>          | 0   | 20   | 12           | 99   | 38           | 29          | 99           | 0            | 98  | 22              | 98  | 99  | 0   | 14  | 99  | 25  | 2   | 0   |
| <i>Porphyromonas asaccharolytica</i>                | 0   | 2    | 0            | 0    | 0            | 0           | 0            | 94           | 0   | 96              | 92  | 22  | 0   | 14  | 60  | 45  | 0   | 99  |
| <i>Porphyromonas endodontalis</i>                   | 0   | 0    | 0            | 0    | 0            | 0           | 0            | 0            | 29  | 95              | 98  | 0   | 0   | 0   | 5   | 2   | 0   | 99  |
| <i>Porphyromonas gingivalis</i>                     | 0   | 2    | 0            | 2    | 0            | 0           | 0            | 0            | 99  | 95              | 96  | 19  | 0   | 5   | 93  | 27  | 27  | 99  |
| <i>Prevotella bivia</i>                             | 0   | 2    | 0            | 97   | 99           | 0           | 0            | 91           | 99  | 98              | 98  | 95  | 2   | 4   | 75  | 24  | 0   | 0   |
| <i>Prevotella buccae</i>                            | 0   | 71   | 31           | 91   | 99           | 94          | 99           | 0            | 1   | 99              | 97  | 10  | 0   | 5   | 6   | 0   | 0   | 0   |
| <i>Prevotella buccalis/veroralis</i>                | 0   | 0    | 0            | 99   | 99           | 6           | 99           | 8            | 95  | 99              | 99  | 98  | 0   | 0   | 0   | 0   | 0   | 0   |
| <i>Prevotella corporis</i>                          | 0   | 0    | 0            | 0    | 98           | 0           | 0            | 29           | 0   | 98              | 96  | 0   | 0   | 0   | 98  | 14  | 6   | 0   |
| <i>Prevotella denticola</i>                         | 0   | 0    | 0            | 99   | 99           | 0           | 91           | 99           | 99  | 99              | 99  | 7   | 0   | 0   | 0   | 0   | 0   | 0   |
| <i>Prevotella disiens</i>                           | 0   | 2    | 0            | 0    | 99           | 0           | 7            | 0            | 0   | 99              | 98  | 90  | 0   | 2   | 90  | 29  | 0   | 0   |
| <i>Prevotella intermedia</i>                        | 0   | 0    | 0            | 0    | 99           | 0           | 0            | 93           | 0   | 98              | 98  | 4   | 0   | 0   | 96  | 6   | 0   | 99  |
| <i>Prevotella loescheii</i>                         | 0   | 0    | 0            | 97   | 98           | 79          | 81           | 80           | 99  | 99              | 99  | 9   | 0   | 1   | 4   | 2   | 0   | 0   |
| <i>Prevotella melaninogenica</i>                    | 0   | 1    | 16           | 98   | 92           | 0           | 90           | 92           | 99  | 98              | 99  | 5   | 0   | 0   | 98  | 2   | 0   | 0   |
| <i>Prevotella oralis</i> Group                      | 0   | 92   | 0            | 92   | 96           | 89          | 91           | 78           | 96  | 98              | 98  | 90  | 0   | 0   | 5   | 2   | 0   | 0   |
| <i>Prevotella oris</i>                              | 0   | 98   | 99           | 88   | 99           | 89          | 78           | 98           | 99  | 99              | 98  | 11  | 0   | 0   | 2   | 0   | 0   | 0   |
| <i>Pseudoflavonifractor capillosus</i> <sup>g</sup> | 0   | 87   | 9            | 95   | 30           | 92          | 0            | 98           | 99  | 96              | 90  | 36  | 0   | 0   | 2   | 5   | 0   | 0   |
| <i>Tannerella forsythia</i> <sup>h</sup>            | 0   | 78   | 0            | 95   | 99           | 50          | 0            | 99           | 99  | 99              | 98  | 12  | 0   | 31  | 99  | 81  | 0   | 98  |
| <i>Wolinella</i> spp.                               | 0   | 0    | 0            | 0    | 0            | 5           | 0            | 0            | 0   | 5               | 0   | 0   | 0   | 0   | 88  | 0   | 0   | 0   |

#### Gram-Variable Bacilli:

|                                    |   |    |    |    |    |    |    |    |    |    |    |    |    |    |    |   |   |   |
|------------------------------------|---|----|----|----|----|----|----|----|----|----|----|----|----|----|----|---|---|---|
| <i>Clostridium clostridioforme</i> | 0 | 84 | 90 | 84 | 85 | 87 | 98 | 0  | 81 | 2  | 93 | 9  | 1  | 13 | 47 | 2 | 7 | 6 |
| <i>Clostridium ramosum</i>         | 0 | 90 | 0  | 84 | 99 | 99 | 76 | 0  | 99 | 0  | 29 | 2  | 0  | 0  | 33 | 0 | 0 | 0 |
| <i>Mobiluncus curtisii</i>         | 0 | 26 | 2  | 31 | 99 | 5  | 95 | 15 | 0  | 5  | 28 | 32 | 99 | 86 | 90 | 5 | 0 | 0 |
| <i>Mobiluncus mulieris</i>         | 0 | 26 | 2  | 31 | 99 | 5  | 0  | 15 | 0  | 5  | 28 | 32 | 99 | 86 | 90 | 5 | 0 | 0 |
| <i>Tissierella praeacuta</i>       | 0 | 0  | 0  | 0  | 0  | 0  | 0  | 0  | 0  | 85 | 88 | 26 | 0  | 0  | 92 | 0 | 0 | 0 |

<sup>a</sup>Frühere Bezeichnung *Bacteroides tectum*.

<sup>b</sup>Frühere Bezeichnung *Bacteroides gracilis*.

<sup>c</sup>Frühere Bezeichnung *Bacteroides ureolyticus*.

<sup>d</sup>Frühere Bezeichnung *Bacteroides splanchnicus*.

<sup>e</sup>Frühere Bezeichnung *Bacteroides distasonis*.

<sup>f</sup>Frühere Bezeichnung *Bacteroides merdae*.

<sup>g</sup>Frühere Bezeichnung *Bacteroides capillosus*.

<sup>h</sup>Frühere Bezeichnung *Bacteroides forsythus*.

## RAPID ANA II Differenzierungstabelle: Grampositive Bacilli

| Organism                                          | URE | BLTS | $\alpha$ ARA | ONPG | $\alpha$ GLU | $\beta$ GLU | $\alpha$ GAL | $\alpha$ FUC | NAG | PO <sub>4</sub> | LGY | GLY | PRO | PAL | ARG | SER | PYR | IND |
|---------------------------------------------------|-----|------|--------------|------|--------------|-------------|--------------|--------------|-----|-----------------|-----|-----|-----|-----|-----|-----|-----|-----|
| <i>Actinomyces bovis</i>                          | 0   | 0    | 0            | 0    | 0            | 12          | 0            | 0            | 99  | 0               | 99  | 99  | 99  | 86  | 99  | 99  | 0   | 0   |
| <i>Actinomyces israelii</i>                       | 0   | 29   | 61           | 87   | 99           | 97          | 93           | 0            | 2   | 2               | 86  | 92  | 99  | 98  | 98  | 64  | 19  | 0   |
| <i>Actinomyces meyeri</i>                         | 0   | 2    | 0            | 69   | 93           | 0           | 0            | 0            | 79  | 0               | 92  | 98  | 99  | 78  | 98  | 96  | 38  | 0   |
| <i>Actinomyces naeslundii</i>                     | 90  | 15   | 0            | 96   | 86           | 96          | 93           | 0            | 0   | 15              | 57  | 80  | 97  | 87  | 65  | 10  | 0   | 0   |
| <i>Actinomyces odontolyticus</i>                  | 0   | 4    | 15           | 86   | 96           | 46          | 5            | 92           | 5   | 20              | 92  | 98  | 99  | 82  | 98  | 98  | 0   | 0   |
| <i>Actinomyces turicensis</i>                     | 0   | 0    | 0            | 0    | 99           | 0           | 0            | 28           | 0   | 0               | 88  | 91  | 96  | 90  | 99  | 96  | 0   | 0   |
| <i>Actinomyces viscosus</i>                       | 81  | 76   | 0            | 91   | 99           | 92          | 62           | 0            | 0   | 0               | 76  | 98  | 99  | 86  | 92  | 33  | 0   | 0   |
| <i>Arcanobacterium pyogenes</i> <sup>a</sup>      | 0   | 12   | 15           | 86   | 0            | 0           | 0            | 0            | 99  | 75              | 93  | 96  | 96  | 86  | 98  | 96  | 2   | 0   |
| <i>Atopobium minutum</i> <sup>b</sup>             | 0   | 0    | 0            | 0    | 0            | 26          | 99           | 0            | 0   | 0               | 0   | 12  | 0   | 0   | 98  | 33  | 0   | 0   |
| <i>Bifidobacterium</i> spp.                       | 0   | 79   | 87           | 90   | 99           | 87          | 92           | 0            | 2   | 2               | 11  | 74  | 93  | 95  | 98  | 93  | 0   | 0   |
| <i>Clostridium baratii</i>                        | 0   | 88   | 0            | 87   | 16           | 76          | 93           | 0            | 96  | 0               | 0   | 0   | 0   | 0   | 82  | 0   | 97  | 0   |
| <i>Clostridium beijerinckii</i>                   | 0   | 42   | 0            | 51   | 99           | 98          | 79           | 0            | 0   | 0               | 0   | 0   | 0   | 0   | 0   | 0   | 0   | 0   |
| <i>Clostridium bifermentans</i>                   | 0   | 0    | 0            | 0    | 2            | 0           | 0            | 2            | 68  | 4               | 0   | 5   | 99  | 38  | 86  | 88  | 3   | 94  |
| <i>Clostridium botulinum f</i>                    | 0   | 0    | 0            | 0    | 82           | 26          | 0            | 0            | 0   | 0               | 0   | 0   | 99  | 98  | 98  | 98  | 0   | 0   |
| <i>Clostridium botulinum II</i> <sup>c</sup>      | 0   | 0    | 0            | 0    | 99           | 0           | 0            | 0            | 60  | 9               | 0   | 0   | 0   | 0   | 0   | 0   | 0   | 0   |
| <i>Clostridium butyricum</i>                      | 0   | 9    | 85           | 91   | 98           | 0           | 99           | 2            | 0   | 0               | 0   | 0   | 3   | 0   | 9   | 6   | 0   | 0   |
| <i>Clostridium cadaveris</i>                      | 0   | 0    | 0            | 0    | 0            | 0           | 0            | 94           | 99  | 0               | 2   | 7   | 0   | 7   | 87  | 9   | 98  | 99  |
| <i>Clostridium clostridioforme</i>                | 0   | 84   | 90           | 84   | 85           | 87          | 98           | 0            | 81  | 2               | 93  | 9   | 1   | 13  | 47  | 2   | 7   | 6   |
| <i>Clostridium difficile</i>                      | 0   | 2    | 0            | 2    | 8            | 3           | 0            | 0            | 0   | 9               | 2   | 0   | 99  | 43  | 48  | 16  | 6   | 0   |
| <i>Clostridium glycolicum</i>                     | 0   | 0    | 0            | 10   | 0            | 16          | 0            | 0            | 9   | 99              | 0   | 2   | 99  | 0   | 35  | 9   | 46  | 0   |
| <i>Clostridium hastiforme</i>                     | 0   | 0    | 1            | 0    | 0            | 0           | 0            | 0            | 5   | 2               | 88  | 62  | 92  | 72  | 95  | 98  | 0   | 0   |
| <i>Clostridium histolyticum</i>                   | 0   | 0    | 0            | 9    | 0            | 0           | 0            | 0            | 0   | 0               | 3   | 9   | 0   | 98  | 96  | 91  | 98  | 0   |
| <i>Clostridium innocuum</i>                       | 0   | 5    | 0            | 0    | 20           | 36          | 5            | 0            | 18  | 5               | 2   | 11  | 0   | 76  | 90  | 7   | 80  | 0   |
| <i>Clostridium limosum</i>                        | 0   | 0    | 0            | 0    | 0            | 0           | 0            | 0            | 0   | 0               | 0   | 0   | 0   | 20  | 11  | 0   | 0   | 0   |
| <i>Clostridium novyi A</i>                        | 0   | 0    | 0            | 0    | 0            | 0           | 0            | 0            | 0   | 59              | 0   | 0   | 0   | 0   | 47  | 0   | 0   | 0   |
| <i>Clostridium paraputrificum</i>                 | 0   | 51   | 2            | 99   | 9            | 94          | 5            | 0            | 96  | 6               | 0   | 0   | 0   | 0   | 5   | 0   | 94  | 0   |
| <i>Clostridium perfringens</i>                    | 0   | 39   | 69           | 98   | 76           | 36          | 96           | 18           | 98  | 81              | 2   | 26  | 4   | 80  | 92  | 43  | 96  | 0   |
| <i>Clostridium ramosum</i>                        | 0   | 90   | 0            | 84   | 99           | 99          | 76           | 0            | 99  | 0               | 29  | 2   | 0   | 0   | 33  | 0   | 0   | 0   |
| <i>Clostridium septicum</i>                       | 0   | 2    | 16           | 99   | 14           | 0           | 2            | 0            | 99  | 0               | 0   | 0   | 0   | 0   | 10  | 9   | 5   | 0   |
| <i>Clostridium sordellii</i>                      | 98  | 0    | 0            | 0    | 26           | 0           | 0            | 42           | 0   | 28              | 9   | 24  | 99  | 79  | 98  | 92  | 27  | 98  |
| <i>Clostridium sporogenes</i>                     | 0   | 0    | 0            | 7    | 39           | 32          | 0            | 0            | 0   | 2               | 2   | 5   | 99  | 15  | 9   | 16  | 92  | 0   |
| <i>Clostridium subterminale</i>                   | 0   | 0    | 0            | 2    | 0            | 5           | 0            | 36           | 0   | 3               | 63  | 33  | 3   | 36  | 80  | 69  | 94  | 0   |
| <i>Clostridium tertium</i>                        | 0   | 84   | 76           | 98   | 47           | 26          | 96           | 2            | 99  | 8               | 0   | 0   | 11  | 0   | 91  | 5   | 8   | 0   |
| <i>Clostridium tetani</i>                         | 0   | 0    | 0            | 0    | 0            | 0           | 0            | 0            | 0   | 13              | 0   | 0   | 0   | 0   | 66  | 0   | 0   | 26  |
| <i>Collinsella aerofaciens</i> <sup>d</sup>       | 0   | 77   | 9            | 2    | 76           | 10          | 5            | 0            | 20  | 13              | 5   | 9   | 93  | 26  | 97  | 56  | 0   | 0   |
| <i>Eggerthella lenta</i> <sup>e</sup>             | 0   | 0    | 0            | 0    | 3            | 0           | 0            | 0            | 2   | 0               | 0   | 11  | 1   | 5   | 97  | 73  | 0   | 0   |
| <i>Eubacterium limosum</i>                        | 0   | 0    | 0            | 0    | 0            | 7           | 0            | 0            | 0   | 12              | 95  | 18  | 9   | 16  | 5   | 0   | 0   | 0   |
| <i>Lactobacillus acidophilus</i>                  | 0   | 81   | 0            | 21   | 91           | 99          | 12           | 0            | 73  | 0               | 99  | 98  | 90  | 76  | 98  | 98  | 78  | 0   |
| <i>Lactobacillus casei</i>                        | 0   | 89   | 0            | 70   | 78           | 96          | 0            | 22           | 99  | 5               | 82  | 97  | 80  | 16  | 98  | 90  | 90  | 0   |
| <i>Lactobacillus catenaforme</i>                  | 0   | 5    | 0            | 9    | 99           | 99          | 5            | 0            | 93  | 0               | 0   | 71  | 0   | 0   | 98  | 0   | 88  | 0   |
| <i>Lactobacillus fermentum</i>                    | 0   | 26   | 2            | 96   | 86           | 0           | 99           | 0            | 0   | 0               | 5   | 81  | 0   | 88  | 98  | 96  | 0   | 0   |
| <i>Lactobacillus jensenii</i>                     | 0   | 71   | 1            | 0    | 82           | 99          | 2            | 0            | 5   | 0               | 0   | 93  | 99  | 98  | 98  | 95  | 0   | 0   |
| <i>Mobiluncus curtisii</i>                        | 0   | 19   | 0            | 12   | 99           | 5           | 95           | 11           | 0   | 5               | 26  | 30  | 99  | 80  | 95  | 3   | 0   | 0   |
| <i>Mobiluncus mulieris</i>                        | 0   | 26   | 2            | 31   | 99           | 5           | 0            | 15           | 0   | 3               | 27  | 32  | 99  | 85  | 90  | 5   | 0   | 0   |
| <i>Propionibacterium acnes</i>                    | 0   | 0    | 0            | 5    | 52           | 0           | 0            | 0            | 88  | 2               | 96  | 98  | 98  | 48  | 98  | 96  | 71  | 85  |
| <i>Propionibacterium granulosum</i>               | 0   | 0    | 5            | 0    | 82           | 0           | 67           | 0            | 0   | 0               | 98  | 98  | 99  | 33  | 96  | 60  | 0   | 0   |
| <i>Propionibacterium propionicum</i> <sup>f</sup> | 0   | 18   | 2            | 78   | 99           | 0           | 99           | 12           | 0   | 0               | 75  | 75  | 65  | 88  | 98  | 12  | 0   | 0   |

<sup>a</sup>Frühere Bezeichnung *Actinomyces pyogenes*.<sup>b</sup>Frühere Bezeichnung *Lactobacillus minutus*.<sup>c</sup>*C. botulinum* Gruppe I besteht aus Toxin Typ A und proteolytischen Stämmen von Toxin Typ B und F.<sup>d</sup>*C. botulinum* Gruppe II besteht aus Toxin Typ E und nichtproteolytischen Stämmen von Toxin Typ B und F.<sup>e</sup>Frühere Bezeichnung *Eubacterium aerofaciens*.<sup>f</sup>Frühere Bezeichnung *Eubacterium lentum*.<sup>g</sup>Frühere Bezeichnung *Propionibacterium propionicus*.

**remel****RapID ANA II System****USO PREVISTO**

RapID™ ANA II System Remel è un micrometodo qualitativo che utilizza substrati convenzionali e cromogenici per l'identificazione di batteri anaerobi di rilevanza clinica nella patologia umana. L'uso di RapID ANA II System per l'identificazione e la differenziazione dei batteri anaerobi di origine veterinaria non è stato ancora pienamente convalidato. L'elenco completo dei microrganismi identificabili con RapID ANA II System è riportato nelle Tabelle Differenziali.

**DESCRIZIONE DEL PRODOTTO**

RapID ANA II System comprende i pannelli RapID ANA II (1) e RapID ANA II Reagent. I pannelli RapID ANA II sono gallerie monouso in plastica costituite da una serie di pozzetti contenenti i diversi reagenti disidratati utilizzati nelle reazioni biochimiche. La galleria permette l'inoculo contemporaneo di ciascun pozzetto con una quantità predefinita di sospensione batterica. I microrganismi da identificare vengono sospesi in RapID Inoculation Fluid: è l'inoculo stesso che consente la contemporanea reidratazione e attivazione delle reazioni biochimiche. Dopo l'incubazione, il pannello viene esaminato valutando lo sviluppo di colore che si è prodotto all'interno dei pozzetti. In alcuni pozzetti è necessario aggiungere un reagente per ottenere un cambiamento di colore. Le modèle résultant de scores positifs et négatifs au test sert de base à l'identification de l'isolat du test en comparant les résultats obtenus à des modèles de réactivité enregistrés dans une base de données, via l'utilisation d'Electronic RapID Compendium (ERIC™) ou grâce au tableau différentiel RapID ANA II.

**PRINCIPIO**

I test utilizzati da RapID ANA II System si basano sulla degradazione microbiologica di specifici substrati, evidenziata da un sistema di differenti indicatori. Le reazioni impiegate sono una combinazione di analisi convenzionali e cromogeniche a substrato singolo, come descritto di seguito nella tabella 1.

**REAGENTI\***

**RapID ANA II Reagent** (fornito nel kit)  
(Flacone da 15 ml)

Componente del reattivo per litro:

p-Dimetilamminocinamaldeide ..... 0,06 g

**RapID Inoculation Fluid** (R8325102, fornito a parte) (Provetta da 1 ml)

KCl ..... 6,0 g

CaCl<sub>2</sub> ..... 0,5 g

Acqua demineralizzata ..... 1000,0 ml

**RapID Spot Indole Reagent** (R8309002, fornito a parte)(Flacone da 15 ml)

p-Dimetilamminocinamaldeide ..... 10,0 g

Acido cloridrico ..... 100,0 ml

Acqua demineralizzata ..... 900,0 ml

\*La formulazione è regolata in base ai criteri di performance richiesti.

**PRECAUZIONI**

Il prodotto è indicato esclusivamente per Uso diagnostico *in vitro* e deve essere utilizzato solo da personale competente ed esperto. Si raccomanda di prendere le dovute precauzioni contro eventuali rischi microbiologici sterilizzando opportunamente dopo l'uso campioni, contenitori, strumenti e pannelli di analisi. Leggere con attenzione le istruzioni contenute in questo documento e seguirle scrupolosamente.

**Attenzione!**

1. RapID ANA II Reagent è tossico e può provocare effetti negativi per l'ambiente. È nocivo per inalazione, contatto con la pelle o con gli occhi e per ingestione. Può ridurre la fertilità e danneggiare i bambini non ancora nati.
2. RapID Spot Indole Reagent può essere irritante per la pelle, per gli occhi e per le vie respiratorie.
3. Consultare la Scheda di Sicurezza del prodotto per informazioni dettagliate sui reagenti chimici.

**Composizione / informazioni sugli ingredienti**

**2-metossietanolo 109-86-4**

**Acido acetico 64-19-7**

**Acido cloridrico 7647-01-0**

Segnalazione verbale

**PERICOLO**

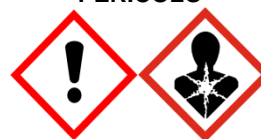

Solo USA

USA & UE

**Fraresi di rischio**

**Provoca irritazione cutanea**

**Provoca grave irritazione oculare**

**Può causare irritazioni alle vie respiratorie**

**Può provocare sonnolenza o vertigini**

**Può nuocere alla fertilità o al feto**

**Può provocare danni agli organi in caso di esposizione prolungata o ripetuta**

**Esposizione**

**Indicazioni di prudenza**

**Prevenzione**

**Procurarsi istruzioni specifiche prima dell'uso**

**Non manipolare prima di avere letto e compreso tutte le avvertenze**

**Utilizzare il dispositivo di protezione individuale richiesto**

**Lavare accuratamente il viso, le mani e qualsiasi area cutanea esposta dopo la manipolazione**

**Proteggere gli occhi/Proteggere il viso**

**Non respirare la polvere / i fumi / i gas / la nebbia / i vapori / gli aerosol**

**Utilizzare soltanto all'aperto o in luogo ben ventilato**

**Reazione**

**In caso di esposizione o di possibile esposizione, consultare un medico**

**Inalazione**

**IN CASO DI INALAZIONE:** trasportare l'infortunato all'aria aperta e mantenerlo a riposo in posizione che favorisca la respirazione

**Pelle**

**IN CASO DI CONTATTO CON LA PELLE:** lavare abbondantemente con acqua e sapone

**In caso di irritazione della pelle:** consultare un medico

**Togliere gli indumenti contaminati e lavarli prima di indossarli nuovamente**

**Occhi**

**IN CASO DI CONTATTO CON GLI OCCHI:** sciacquare accuratamente per parecchi minuti. Togliere le eventuali lenti a contatto se è agevole farlo.

**Continuare a sciacquare**

**Se l'irritazione persiste:** consultare un medico

**Conservazione**

**Conservare sotto chiave**

**Conservare in luogo ben ventilato. Tenere il recipiente ben chiuso**

**Smaltimento**

**Smaltire il prodotto/recipiente in un centro autorizzato allo smaltimento dei rifiuti**

**Pericoli non altrimenti classificati**

**Non individuati**

**AVVERTENZA!** Questo prodotto contiene una sostanza chimica nota nello Stato della California per causare difetti di nascita o altri danni riproduttivi.

**Numero telefonico per le emergenze**

**INFOTRAC - numero attivo 24 ore su 24: 1-800-535-5053**

**Al di fuori degli Stati Uniti, chiamare il numero attivo 24 ore su 24: 001-352-323-3500 (a carico del destinatario)**

**CONDIZIONI DI CONSERVAZIONE**

RapID ANA II System e RapID Spot Indole Reagent devono essere conservati nei contenitori originali fino all'uso, a una temperatura compresa tra 2-8°C. Tutti i prodotti devono essere portati a temperatura ambiente prima dell'uso. NON scambiare i reagenti tra diversi sistemi RapID. Rimuovere solo il numero di pannelli necessari alle analisi. Richiudere nuovamente la busta di plastica con la propria chiusura sigillante e rimettere immediatamente a 2-8°C. Utilizzare i pannelli il giorno stesso in cui vengono rimossi dal luogo di conservazione. RapID Inoculation Fluid deve essere conservato nel contenitore originale a temperatura ambiente (20-25°C) fino al momento dell'utilizzo.

**DETERIORAMENTO DEL PRODOTTO**

Non utilizzare il prodotto se: (1) si è modificato il colore del reagente, (2) è trascorsa la data di scadenza del prodotto, (3) la galleria in plastica è danneggiata o la copertura adesiva non è integra o (4) se sono presenti altri segni di deterioramento.

**RACCOLTA DEI CAMPIONI, CONSERVAZIONE E TRASPORTO**

Prelevare e trattare i campioni seguendo le linee guida raccomandate.<sup>19,20</sup>

**MATERIALE FORNITO**

(1) 20 pannelli RapID ANA II, (2) 20 schede di lavoro, (3) RapID ANA II Reagent (un flacone con contagocce contenente reagente q.b. per 20 pannelli), (4) 2 vassoi in cartone per l'incubazione, (5) istruzioni per l'uso (IFU).

**Simboli sul contenuto**

|                         |                              |
|-------------------------|------------------------------|
| <b>ANA II Panels</b>    | Pannelli ANA II              |
| <b>Report Forms</b>     | Moduli di refertazione RapID |
| <b>ANA II Reagent</b>   | Reagente ANA II              |
| <b>Incubation Trays</b> | Vassoi per incubazione       |

**MATERIALE NECESSARIO MA NON FORNITO**

(1) Dispositivo di sterilizzazione per anse, (2) ansa per inoculo, tampone, contenitori per rifiuti contaminati, (3) termostato o sistemi per la formazione di atmosfere modificate, (4) terreni di coltura supplementari, (5) microrganismi per il controllo qualità, (6) reagenti per la colorazione di Gram, (7) vetrini per microscopio, (8) tamponi in cotone, (9) RapID Inoculation Fluid - 1 ml (R8325102), (10) Standard di Torbidità McFarland N.3 o equivalente (R20413), (11) pipette, (12) RapID Spot Indole Reagent (R8309002), (13) ERIC (Electronic RapID Compendium, R8323600).

**Tabella 1. Principio e componenti di RapID ANA II System**

| N. pozzetto                              | Codice reazione | Reagente contenuto nel pozzetto           | Concentrazione % del reagente | Principio del test                                                                                                                  | Riferimento bibliografico |
|------------------------------------------|-----------------|-------------------------------------------|-------------------------------|-------------------------------------------------------------------------------------------------------------------------------------|---------------------------|
| <b>Prima dell'aggiunta del reagente:</b> |                 |                                           |                               |                                                                                                                                     |                           |
| 1                                        | URE             | Urea                                      | 0,4%                          | Dall'idrolisi dell'urea derivano prodotti basici che determinano un innalzamento del pH e un cambiamento di colore dell'indicatore. | 1-3                       |
| 2                                        | BLTS            | p-nitrofenil-β, D-disaccaride             | 0,1%                          | L'idrolisi enzimatica di glicoside aril-sostituito incolore o fosfoestere rilascia σ- o p-nitrofenolo giallo.                       | 4-8                       |
| 3                                        | αARA            | p-nitrofenil-α, L-arabinoside             | 0,1%                          |                                                                                                                                     |                           |
| 4                                        | ONPG            | σ-nitrofenil-β, D-galattoside             | 0,1%                          |                                                                                                                                     |                           |
| 5                                        | αGLU            | p-nitrofenil-α, D-glucoside               | 0,1%                          |                                                                                                                                     |                           |
| 6                                        | βGLU            | p-nitrofenil-β, D-glucoside               | 0,08%                         |                                                                                                                                     |                           |
| 7                                        | αGAL            | p-nitrofenil-α, D-galattoside             | 0,08%                         |                                                                                                                                     |                           |
| 8                                        | αFUC            | p-nitrofenil-α, L-fucoside                | 0,08%                         |                                                                                                                                     |                           |
| 9                                        | NAG             | p-nitrofenil-n-acetil-β, D-glucosamminide | 0,1%                          |                                                                                                                                     |                           |
| 10                                       | PO <sub>4</sub> | p-nitrofenilfosfato                       | 0,1%                          |                                                                                                                                     |                           |
| <b>Dopo l'aggiunta del reagente:</b>     |                 |                                           |                               |                                                                                                                                     |                           |
| 3                                        | LGY             | Leucil-glicina-β-naftilammide             | 0,08%                         | L'idrolisi enzimatica del substrato arilammidico rilascia β-naftilammia libera che viene rilevata da RapID ANA II Reagent.          | 6, 8-14                   |
| 4                                        | GLY             | Glicina-β-naftilammide                    | 0,08%                         |                                                                                                                                     |                           |
| 5                                        | PRO             | Prolina-β-naftilammide                    | 0,08%                         |                                                                                                                                     |                           |
| 6                                        | PAL             | Fenilalanina-β-naftilammide               | 0,05%                         |                                                                                                                                     |                           |
| 7                                        | ARG             | Arginina-β-naftilammide                   | 0,05%                         |                                                                                                                                     |                           |
| 8                                        | SER             | Serina-β-naftilammide                     | 0,08%                         |                                                                                                                                     |                           |
| 9                                        | PYR             | Pirrolidonil-β-naftilammide               | 0,08%                         |                                                                                                                                     |                           |
| 10                                       | IND             | Triptofano                                | 0,01%                         | L'utilizzo del triptofano porta alla formazione di indolo rilevato da RapID Spot Indole Reagent.                                    | 15,16                     |

**PROCEDIMENTO**

**Preparazione dell'inoculo:**

1. I microrganismi da sottoporre ad analisi devono provenire da colture pure cresciute in anaerobiosi, e devono essere prima stati valutati con la colorazione di Gram.
2. I microrganismi da sottoporre ad analisi possono essere prelevati da diversi terreni di coltura, selettivi o non selettivi. Si raccomandano i seguenti tipi di terreno di coltura.

Terreni non selettivi: Agar sangue di montone 5-7% preparato con Brucella Agar; Columbia Agar; Brain Heart Infusion Agar; Lombard-Dowell, o Tryptic Soy Agar.

Terreni di coltura differenziali o selettivi: Fenilettil Alcol Agar (PEA); Egg Yolk Agar (EYA); Paromomicina/vancomicina (PV) Agar; Kanamicina/vancomicina (KV) Agar.

**Note:**

- NON è raccomandato l'utilizzo di "agar ridicibili" contenenti cloruro di palladio e altri agenti riducenti in quanto potrebbero interferire con alcune attività enzimatiche.
- Kanamicina-bile-esculina Agar (KBE) e Bacteroides-bile-esculina Agar (BBE) sono SCONSIGLIATI in quanto il complesso esculetina-ioni ferrici, che potrebbe formarsi, può interferire con l'interpretazione dei risultati.
- Alcuni terreni contenenti, o addizionati con mono o disaccaridi, NON sono consigliati in quanto potrebbero sopprimere l'attività glicolitica e ridurre la reattività dell'analisi. La maggior parte

delle formulazioni di Schaedler Agar contiene destrosio in quantità sufficiente da interferire con l'attività glicosidasi.

- Le piastre utilizzate nella preparazione dell'inoculo devono essere state seminate da non più di 72 ore (preferibilmente da 18-24 ore).
  - L'uso di terreni diversi da quelli raccomandati potrebbe pregiudicare la performance del test.
3. Con un tampone in cotone o con un'ansa, prelevare i microrganismi dalla piastra e sospenderli in RapID Inoculation Fluid. (1 ml) La sospensione deve avere una torbidità almeno equivalente allo standard McFarland N.3.

**Note:**

- Torbidità notevolmente inferiori allo standard McFarland N.3 potrebbero dar luogo a reazioni aberranti.
  - Torbidità **leggermente** superiori allo standard McFarland N.3 non pregiudicano la performance del test e sono raccomandate per colture in stock e per ceppi di controllo. Tuttavia, le sospensioni preparate con torbidità molto superiori allo standard McFarland N.3 potrebbero compromettere il risultato del test.
  - La sospensione deve essere agitata accuratamente, se necessario su vortex.
  - Utilizzare le sospensioni entro 15 minuti dalla preparazione.
4. Seminare su agar un'ansata della sospensione per verificare la purezza del ceppo e per eventuali ulteriori controlli. Incubare la piastra in anaerobiosi per almeno 18-24 ore a 35-37°C

**Inoculo dei pannelli RapID ANA II:**

1. Sollevare la copertura adesiva che ricopre la parte del pannello destinata a ricevere l'inoculo (angolo superiore destro), sollevando verso sinistra la linguetta contrassegnata da "Peel to inoculate".
2. Con l'aiuto di una pipetta, trasferire delicatamente **tutto** il contenuto della provetta con la sospensione batterica (Inoculation Fluid) nell'angolo superiore destro del pannello. Sigillare nuovamente la copertura del pannello riposizionando e facendo nuovamente aderire la linguetta.
3. Dopo aver aggiunto la sospensione da analizzare, mantenendo il pannello su una superficie piana, inclinare lo stesso con un angolo di circa 45 gradi, sollevando dal piano d'appoggio il lato su cui si trovano i pozzetti contenenti i reagenti (come indicato in figura).

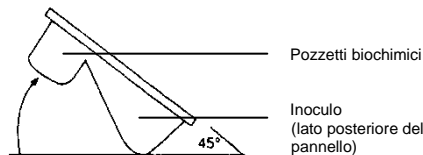

4. Mantenendo il pannello inclinato, farlo oscillare da un lato all'altro (dal lato sinistro a quello destro e viceversa) per distribuire uniformemente l'inoculo nella serie di cavità presenti nella parte posteriore del pannello stesso, come mostrato di seguito.

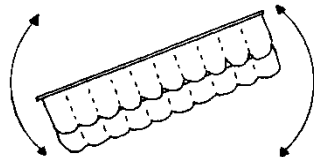

5. Rimettere il pannello in posizione orizzontale. Tenendo aderente al piano d'appoggio il lato su cui si trovano i pozzetti che contengono i reagenti, inclinare lentamente il pannello, sollevando questa volta il lato lungo il quale è distribuito l'inoculo (come mostrato di seguito). Questa operazione consente il passaggio di tutto l'inoculo dal canaletto d'inoculo (parte posteriore del pannello) ai pozzetti con le reazioni biochimiche.

**Nota:** se il pannello viene inclinato troppo velocemente si possono formare delle bolle d'aria che impediscono all'inoculo di scorrere liberamente nei pozzetti.

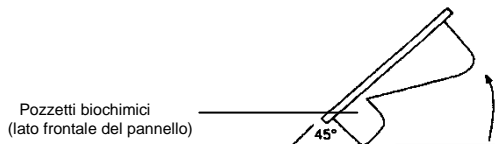

6. Riportare il pannello in posizione orizzontale. Se necessario, battere delicatamente il pannello sul piano di lavoro per eliminare eventuali bolle d'aria presenti nei pozzetti.

**Note:**

- Accertarsi che i pozzetti siano privi di bolle d'aria e riempiti uniformemente. Leggere differenze di riempimento tra i pozzetti sono accettabili e non pregiudicano la performance del test. Se i livelli di riempimento sono notevolmente diversi, ripetere il test utilizzando un nuovo pannello.
- Completare le operazioni di inoculo di ciascun pannello con Inoculation Fluid, prima di procedere con altri pannelli.
- Non lasciare l'inoculo nella parte posteriore del pannello per lungo tempo, prima di aver eseguito l'intera procedura.

**Incubazione dei pannelli RapID ANA II:**

Incubare i pannelli inoculati a una temperatura di 35-37°C, in un termostato non a CO<sub>2</sub> per almeno 4 ore. Non superare in ogni caso le 6 ore d'incubazione. Per una migliore manipolazione, i pannelli possono essere posti a incubare direttamente nei vassoi in cartone forniti con il kit.

**Nota:** se necessario, dopo un periodo di incubazione di 4-6 ore - e prima di aggiungere i reagenti -, è possibile conservare i pannelli RapID ANA II in frigorifero (2-8°C) per eseguire la lettura il giorno successivo.

**Risultati dei pannelli RapID ANA II:**

I pannelli RapID ANA II contengono 10 pozzetti che forniscono 18 risultati di analisi. I pozzetti dal n. 3 al n. 10 sono bi-funzionali: ciascun pozzetto contiene i reagenti per due reazioni biochimiche differenti. I pozzetti bi-funzionali vengono letti prima e dopo l'aggiunta del reagente, fornendo

- te da un lotto diverso o proveniente da un altro produttore.

così due risultati distinti. I pozzetti bi-funzionali dal n. 3 al n. 9 (che richiedono il reagente RapID ANA II) sono, nel primo test, indicati sopra la barra e nel secondo, sotto la barra. Il test bi-funzionale 10, che utilizza RapID Spot Indole Reagent è contraddistinto da un riquadro.

**Posizione del test nel pannello RapID ANA II**

| N. pozzetto           | 1   | 2    | 3           | 4           | 5           | 6           | 7           | 8           | 9          | 10                     |
|-----------------------|-----|------|-------------|-------------|-------------|-------------|-------------|-------------|------------|------------------------|
| Codice della reazione | URE | BLTS | αARA<br>LGY | ONPG<br>GLY | αGLU<br>PRO | βGLU<br>PAL | αGAL<br>ARG | αFUC<br>SER | NAG<br>PYR | PO <sub>4</sub><br>IND |

1. Tenendo saldamente il pannello RapID ANA II sul piano di lavoro, sollevare la copertura adesiva posta sopra i pozzetti tirando verso sinistra l'apposita linguetta.
2. Senza aggiungere reagenti, leggere i pozzetti dal n. 1 (URE) al n. 10 (PO<sub>4</sub>) procedendo da sinistra a destra, facendo riferimento alla Tabella 2 per i criteri di lettura. Registrare sulla scheda di lavoro i valori ottenuti nelle relative caselle utilizzando, per le analisi bi-funzionali, il codice della reazione indicato sopra la barra.
3. Aggiungere due gocce di RapID Spot Indole Reagent nel pozzetto 10 (IND).  
**Nota:** utilizzare solo RapID Spot Indole Reagent. I reagenti per l'indolo di Kovacs o Ehrlich non forniscono risultati soddisfacenti.
4. Aggiungere due gocce di RapID ANA II Reagent nei pozzetti dal n. 3 (LGY) al n. 9 (PYR).
5. Per valutare lo sviluppo del colore attendere almeno 30 secondi, ma non superare in ogni caso i 2 minuti. Leggere i pozzetti dal n. 3 al n. 10. Registrare i valori nelle relative caselle presenti nel foglio di lavoro utilizzando, per le reazioni bifunzionali, i codici delle reazioni che si trovano sotto la barra.
6. Per l'identificazione, confrontare il microcodice ottenuto nel foglio di lavoro con quello riportato nel database elettronico ERIC.

**RISULTATI E VALORI ATTESI**

Le Tavole Differenziali RapID ANA II illustrano i risultati attesi per RapID ANA II System. Le tabelle mostrano le percentuali di positività delle diverse reazioni biochimiche. Queste informazioni rappresentano il supporto statistico per l'utilizzo di ciascun test, e costituiscono le basi per l'approccio probabilistico all'identificazione del microorganismo, la quale è, nello specifico, ottenuta mediante un sistema numerico di codifica dei risultati dei test.

L'identificazione definitiva è effettuata utilizzando i risultati dei singoli test ottenuti con i pannelli RapID ANA II, unitamente ad altre informazioni di laboratorio (ad esempio, colorazione di Gram, aerotolleranza, crescita su terreni di coltura differenziali o selettivi). Vengono in tal modo definite delle combinazioni che sono statisticamente riconducibili alle reattività già note per i taxa compresi nel database di RapID System. L'identificazione del microorganismo è pertanto definita confrontando la combinazione ottenuta con quelle riportate nelle Tavole Differenziali RapID ANA II, oppure ricavando un microcodice numerico e consultando ERIC.

**CONTROLLO QUALITÀ**

Ogni lotto di RapID ANA II System è stato sottoposto a controllo qualità con i microrganismi di seguito indicati, e con risultati ritenuti soddisfacenti. I test di controllo qualità devono essere eseguiti in accordo con le procedure di controllo qualità definite dal laboratorio.

Se i test di controllo qualità forniscono risultati aberranti, i risultati ottenuti con i campioni in esame non devono essere refertati. La Tabella 3 contiene i risultati attesi valutando una serie significativa di microrganismi.

**Note:**

- Il controllo qualità di RapID Reagent va effettuato in base ai risultati attesi con le analisi che richiedono l'aggiunta di questo reagente (pozzetti dal n. 3 al n. 9).
- I microrganismi che siano stati coltivati su terreni agarizzati per periodi prolungati e con ripetuti passaggi culturali, possono produrre risultati aberranti.
- Congelare o liofilizzare i ceppi per il controllo qualità. Prima dell'uso, trasferire 2-3 volte i ceppi per il controllo qualità dal mezzo di conservazione al terreno di coltura agarizzato raccomandato per l'uso con RapID ANA II System.
- Le formulazioni, i supplementi e gli ingredienti del terreno di coltura variano da produttore a produttore e anche da lotto a lotto. Di conseguenza, il terreno di coltura può influenzare l'attività enzimatica costitutiva dei ceppi di controllo qualità. Se il ceppo per il controllo qualità fornisce risultati diversi da quelli attesi, spesso le discrepanze riscontrate possono essere risolte con una sottocoltura provenien



Tabella 2. RapID ANA II System – Interpretazione dei risultati\*

| N. Pozzetto                             | Codice reazione | Reagente da aggiungere nel pozzetto | Reazione                              |                                                   |    | Osservazioni                                                                                      |                           |                 |                       |       |                                                                                                                    |
|-----------------------------------------|-----------------|-------------------------------------|---------------------------------------|---------------------------------------------------|----|---------------------------------------------------------------------------------------------------|---------------------------|-----------------|-----------------------|-------|--------------------------------------------------------------------------------------------------------------------|
|                                         |                 |                                     | Positiva                              | Negativa                                          |    |                                                                                                   |                           |                 |                       |       |                                                                                                                    |
| <b>Prima dell'aggiunta del reagente</b> |                 |                                     |                                       |                                                   |    |                                                                                                   |                           |                 |                       |       |                                                                                                                    |
| 1                                       | URE             | Nessuno                             | Rosso o porpora                       | Da giallo arancione                               | ad | Se sono presenti sfumature di colore arancio o rosso-arancio, la reazione è considerata negativa. |                           |                 |                       |       |                                                                                                                    |
| 2                                       | BLTS            | Nessuno                             | Giallo di intensità media o brillante | Nessuna colorazione, beige o giallo molto pallido |    | La reazione è positiva solo se la colorazione è nettamente gialla.                                |                           |                 |                       |       |                                                                                                                    |
| 3                                       | αARA            |                                     |                                       |                                                   |    |                                                                                                   |                           |                 |                       |       |                                                                                                                    |
| 4                                       | ONPG            |                                     |                                       |                                                   |    |                                                                                                   |                           |                 |                       |       |                                                                                                                    |
| 5                                       | αGLU            |                                     |                                       |                                                   |    |                                                                                                   |                           |                 |                       |       |                                                                                                                    |
| 6                                       | βGLU            |                                     |                                       |                                                   |    |                                                                                                   |                           |                 |                       |       |                                                                                                                    |
| 7                                       | αGAL            |                                     |                                       |                                                   |    |                                                                                                   |                           |                 |                       |       |                                                                                                                    |
| 8                                       | αFUC            |                                     |                                       |                                                   |    |                                                                                                   |                           |                 |                       |       |                                                                                                                    |
| 9                                       | NAG             |                                     |                                       |                                                   |    |                                                                                                   |                           |                 |                       |       |                                                                                                                    |
| 10                                      | PO <sub>4</sub> |                                     |                                       |                                                   |    |                                                                                                   |                           |                 |                       |       |                                                                                                                    |
| <b>Dopo l'aggiunta del reagente</b>     |                 |                                     |                                       |                                                   |    |                                                                                                   |                           |                 |                       |       |                                                                                                                    |
| 3                                       | LGY             | RapID ANA II Reagent                | Porpora, violetto, rosso o rosa scuro | Giallo, arancione o rosa pallido                  |    | Attendere per lo sviluppo del colore da un minimo di 30 secondi a un massimo di 2 minuti.         |                           |                 |                       |       |                                                                                                                    |
| 4                                       | GLY             |                                     |                                       |                                                   |    |                                                                                                   |                           |                 |                       |       |                                                                                                                    |
| 5                                       | PRO             |                                     |                                       |                                                   |    |                                                                                                   |                           |                 |                       |       |                                                                                                                    |
| 6                                       | PAL             |                                     |                                       |                                                   |    |                                                                                                   |                           |                 |                       |       |                                                                                                                    |
| 7                                       | ARG             |                                     |                                       |                                                   |    |                                                                                                   |                           |                 |                       |       |                                                                                                                    |
| 8                                       | SER             |                                     |                                       |                                                   |    |                                                                                                   |                           |                 |                       |       |                                                                                                                    |
| 9                                       | PYR             |                                     |                                       |                                                   |    |                                                                                                   |                           |                 |                       |       |                                                                                                                    |
| 10                                      | IND             |                                     |                                       |                                                   |    |                                                                                                   | RapID Spot Indole Reagent | Blu o blu-verde | Qualsiasi colorazione | altra | La reazione è positiva in presenza di qualsiasi sfumatura di blu o di blu-verde, indipendentemente dall'intensità. |

\*NOTA: i pannelli devono essere letti osservando le reazioni dei pozzetti dall'alto, e contro uno sfondo bianco

Tabella 3. Controllo qualità dei pannelli RapID ANA II

| Microrganismo                                             | Prima dell'aggiunta del reagente |      |      |      |      |      |      |      |     |                 | Dopo l'aggiunta di RapID ANA II Reagent |     |     |     |     |     |     | Spot Indole |
|-----------------------------------------------------------|----------------------------------|------|------|------|------|------|------|------|-----|-----------------|-----------------------------------------|-----|-----|-----|-----|-----|-----|-------------|
|                                                           | URE                              | BLTS | αARA | ONPG | αGLU | βGLU | αGAL | αFUC | NAG | PO <sub>4</sub> | LGY                                     | GLY | PRO | PAL | ARG | SER | PYR | IND         |
| <i>Clostridium sordellii</i> <sup>a</sup> ATCC® 9714      | +                                | -    | -    | -    | -    | -    | -    | V    | -   | -               | -                                       | V   | +   | V   | V   | V   | V   | +           |
| <i>Parabacteroides distasonis</i> <sup>a</sup> ATCC® 8503 | -                                | +    | V    | +    | +    | +    | +    | -    | +   | +               | +                                       | +   | -   | +   | +   | +   | +   | -           |
| <i>Bacteroides uniformis</i> ATCC® 8492                   | -                                | +    | +    | +    | +    | +    | +    | +    | +   | +               | +                                       | +   | -   | -   | -   | -   | -   | +           |

+, positivo; -, negativo; V, variabile

<sup>a</sup>I principali ceppi indicatori dimostrano prestazioni accettabili del substrato più labile del sistema e reattività in un numero significativo di pozzetti, in conformità con le raccomandazioni del Clinical and Laboratory Standards Institute per l'ottimizzazione del controllo qualità.<sup>36</sup>

Tavola Differenziale RapID™ ANA II: Cocchi

| Organism                                           | URE | BLTS | αARA | ONPG | αGLU | βGLU | αGAL | αFUC | NAG | PO <sub>4</sub> | LGY | GLY | PRO | PAL | ARG | SER | PYR | IND |
|----------------------------------------------------|-----|------|------|------|------|------|------|------|-----|-----------------|-----|-----|-----|-----|-----|-----|-----|-----|
| <i>Anaerococcus hydrogenalis</i> <sup>a</sup>      | 0   | 0    | 0    | 0    | 98   | 0    | 0    | 0    | 0   | 2               | 9   | 14  | 2   | 1   | 65  | 2   | 96  | 99  |
| <i>Anaerococcus prevotii</i> <sup>b</sup>          | 2   | 0    | 0    | 0    | 9    | 1    | 0    | 0    | 0   | 9               | 11  | 21  | 11  | 16  | 96  | 68  | 2   | 0   |
| <i>Anaerococcus tetradius</i> <sup>c</sup>         | 88  | 5    | 0    | 12   | 88   | 16   | 5    | 0    | 0   | 0               | 33  | 96  | 0   | 88  | 97  | 90  | 61  | 0   |
| <i>Blautia producta</i> <sup>d</sup>               | 0   | 51   | 0    | 99   | 99   | 96   | 56   | 0    | 52  | 0               | 0   | 2   | 0   | 2   | 9   | 6   | 0   | 0   |
| <i>Finexgaldia magna</i> <sup>e</sup>              | 0   | 0    | 0    | 0    | 2    | 0    | 0    | 0    | 2   | 6               | 95  | 96  | 2   | 82  | 98  | 95  | 98  | 0   |
| <i>Gemella morbillorum</i> <sup>f</sup>            | 0   | 0    | 0    | 18   | 80   | 1    | 0    | 0    | 0   | 68              | 71  | 73  | 88  | 93  | 99  | 98  | 4   | 0   |
| <i>Micromonas micros</i> <sup>g</sup>              | 0   | 0    | 0    | 0    | 4    | 0    | 0    | 0    | 5   | 93              | 95  | 98  | 92  | 88  | 98  | 96  | 86  | 0   |
| <i>Peptoniphilus asaccharolyticus</i> <sup>h</sup> | 0   | 0    | 0    | 0    | 3    | 1    | 0    | 0    | 0   | 4               | 11  | 22  | 5   | 20  | 96  | 21  | 8   | 99  |
| <i>Peptoniphilus indolicus</i> <sup>i</sup>        | 0   | 2    | 0    | 0    | 0    | 0    | 0    | 0    | 0   | 99              | 28  | 76  | 0   | 81  | 91  | 98  | 0   | 99  |
| <i>Peptostreptococcus anaerobius</i>               | 0   | 0    | 0    | 0    | 96   | 0    | 0    | 0    | 2   | 0               | 0   | 8   | 92  | 16  | 68  | 18  | 0   | 0   |
| <i>Staphylococcus saccharolyticus</i>              | 21  | 0    | 0    | 0    | 0    | 0    | 0    | 0    | 0   | 18              | 0   | 0   | 0   | 0   | 0   | 0   | 0   | 0   |
| <i>Streptococcus constellatus</i>                  | 0   | 0    | 0    | 0    | 46   | 91   | 18   | 0    | 12  | 94              | 82  | 97  | 6   | 98  | 99  | 93  | 6   | 0   |
| <i>Streptococcus intermedius</i>                   | 0   | 29   | 9    | 99   | 92   | 95   | 8    | 0    | 21  | 92              | 92  | 98  | 78  | 98  | 99  | 96  | 5   | 0   |
| <i>Veillonella spp.</i> <sup>j</sup>               | 0   | 0    | 0    | 0    | 4    | 0    | 0    | 0    | 0   | 59              | 2   | 9   | 1   | 5   | 38  | 16  | 83  | 0   |

<sup>a</sup>Precedentemente denominato *Peptostreptococcus hydrogenalis*

<sup>b</sup>Precedentemente denominato *Peptostreptococcus prevotii*.

<sup>c</sup>Precedentemente denominato *Peptostreptococcus tetradius*.

<sup>d</sup>Precedentemente denominato *Peptostreptococcus productus*.

<sup>e</sup>Precedentemente denominato *Peptostreptococcus magnus*

<sup>f</sup>Precedentemente denominato *Streptococcus morbillorum*.

<sup>g</sup>Precedentemente denominato *Peptostreptococcus micros*.

<sup>h</sup>Precedentemente denominato *Peptostreptococcus asaccharolyticus*.

<sup>i</sup>Precedentemente denominato *Peptostreptococcus indolicus*.

<sup>j</sup>Comprende tre specie che interessano la patologia umana: *V. parvula*, *V. dispar* e *V. atypica*.

**LIMITAZIONI**

- L'uso di RapID ANA II System e l'interpretazione dei risultati richiedono l'esperienza di personale competente e con adeguata preparazione nelle tecniche generali di microbiologia, in grado di valutare in modo appropriato sia i risultati del test, sia le informazioni relative al campione nonché i risultati di altri test, prima di refertare l'identificazione ottenuta con RapID ANA II System.
- Valutare l'origine del campione, l'aerotolleranza, la colorazione di Gram e la crescita su terreni selettivi quando si usa RapID ANA II System.
- I microrganismi da sottoporre a test con RapID ANA II System devono provenire da colture pure. L'utilizzo del prodotto con popolazioni

- batteriche miste o l'analisi diretta di materiale clinico non proveniente da coltura, può fornire risultati aberranti.
- RapID ANA II System è raccomandato per l'utilizzo con i taxa elencati nelle Tavole Differenziali RapID ANA II. L'utilizzo del prodotto con microrganismi diversi da quelli elencati può portare a identificazioni errate.
- I risultati attesi per le reazioni biochimiche su cui si basa RapID ANA II System possono differire da altri convenzionali o da informazioni precedenti.
- L'accuratezza di RapID ANA II è basata sull'uso statistico di una molteplice serie di test appositamente studiata e su un database di proprietà esclusiva. L'uso di qualsiasi test del pannello preso singo-

larmente e ottenuto con RapID ANA II System per l'identificazione di un determinato microorganismo, è soggetto al margine di errore relativo al singolo test preso come tale.

**PERFORMANCE**

La performance di RapID ANA II System è stata valutata con microrganismi isolati da campioni clinici e mediante colture di collezione.<sup>5,10,21-35</sup>

**BIBLIOGRAFIA**

1. Blazevic, D.J. and G.M. Ederer. 1975. Principles of Biochemical Tests in Diagnostic Microbiology. John Wiley & Sons, New York, NY.
2. Dowell, V.R., Jr. and T.M. Hawkins. 1977. Laboratory Methods in Anaerobic Bacteriology, CDC Laboratory Manual. U.S. Dept. of H.H.S. CDC, Atlanta, GA.
3. Holdeman, L.V., E.P. Cato, and W.E.C. Moore. 1977. Anaerobe Laboratory Manual. 4<sup>th</sup> ed. Virginia Polytechnic Institute and State University, Blacksburg, VA.
4. Barnes, E.H. and J.F. Morris. 1957. J. Bacteriol. 73:100-104.
5. Dellinger, C.A. and L.V. Moore. 1986. J. Clin. Microbiol. 23:289-293.
6. Guibault, G.G. 1970. Enzymatic Methods of Analysis. p. 43-51. Pergamon Press, New York, NY.
7. Kilian, M. and P. Bulow. 1976. Acta. Pathol. Microbiol. Scand. B. 84:245-251.
8. Tharagonnat, D., P.R. Sisson, C.M. Roxby, H.R. Ingham, and J.B. Selkon. 1977. J. Clin. Pathol. 30:505-509.
9. Bodansky, O. and A.L. Latner. 1975. Advances in Clinical Chemistry. Vol. 17, p. 53-61. Academic Press, New York, NY.
10. Celig, D.M. and P.C. Schreckenberger. 1991. J. Clin. Microbiol. 29:457-462.
11. Nagatsu, T., M. Hino, H. Fuyamada, T. Hayakawa, S. Sakakibara, Y. Nakagawa, and T. Takemoto. 1976. Anal. Biochem. 74:466-476.
12. Norris, J.R. and D.W. Ribbons. 1976. Methods in Microbiology. Vol. 9, p. 1-14. Academic Press, New York, NY.
13. Peterson, E.H. and E.J. Hsu. 1978. J. Food Sci. 43:1853-1856.
14. Westley, J.R., P.J. Anderson, V.A. Close, B. Halpern, and E.M. Lederberg. 1967. Appl. Microbiol. 15:822-825.
15. Fay, G.D. and A.L. Barry. 1974. Appl. Microbiol. 15:822-825.
16. Sutter, V.L. and W.T. Carter. 1972. J. Clin. Pathol. 58:335-339.
17. Holdeman, L.V., E.P. Cato, and W.E.C. Moore. 1987. Anaerobe Laboratory Manual Update. Supplement to the 4<sup>th</sup> ed. Virginia Polytechnic Institute and State University, Blacksburg, VA.
18. Summanen, P., E.J. Baron, D.M. Citron, C.A. Strong, H.M. Wexler, and S.M. Finegold. 1993. Wadsworth Anaerobic Bacteriology Manual. 5<sup>th</sup> ed. Star Publishing Company, Belmont, CA.
19. Murray, P.R., E.J. Baron, J.H. Jorgensen, M.L. Landry, and M.A. Pfaller. 2007. Manual of Clinical Microbiology, 9<sup>th</sup> ed. ASM Press, Washington, D.C.
20. Forbes, B.A., D.F. Sahm, and A.S. Weissfeld. 2007. Bailey and Scott's Diagnostic Microbiology. 12<sup>th</sup> ed. Mosby Elsevier, St. Louis, MO.
21. Alexander, C.J., D.M. Citron, S. Hunt Gerardo, M.C. Claros, D. Talan, and E.J. Goldstein. 1997. J. Clin. Microbiol. 35:406-411.
22. Appelbaum, P.C., C.S. Kaufman, J.C. Keifer, and J.J. Venbrux. 1984. J. Clin. Microbiol. 18:615-621.
23. Appelbaum, P.C., J.W. Depenbusch, and C.S. Kaufman. 1984. Abstract C-153. Abstracts of the 84<sup>th</sup> General Meeting of the American Society for Microbiology. ASM, Washington, D.C.
24. Burdash, N.M., K.A. Corey, P.J. Fortuna, M.L. Beasley, E.R. Bannister, and J.P. Manos. 1984. Abstract C-150. Abstracts of the 84<sup>th</sup> General Meeting of the American Society for Microbiology. ASM, Washington, D.C.
25. Hamilton, L.T., C. Ayer, and D.N. Wright. 1985. Abstract C-159. Abstracts of the 85<sup>th</sup> General Meeting of the American Society for Microbiology. ASM, Washington, D.C.
26. Hansen, S.L. and W.A. Pope. 1984. Abstract C-147. Abstracts of the 84<sup>th</sup> General Meeting of the American Society for Microbiology. ASM, Washington, D.C.
27. Hudspeth, M.K., S. Hunt Gerardo, M.F. Maiden, D.M. Citron, and E.J. Goldstein. 1999. J. Clin. Microbiol. 37:2003-2006.
28. Kaplan, R.L., M.J. O'Brian, and W. Landua. 1985. Abstract C-163. Abstracts of the 85<sup>th</sup> General Meeting of the American Society for Microbiology. ASM, Washington, D.C.

29. Karachewski, N.O., E.L. Busch, and C.L. Wells. 1984. Abstract C-148. Abstracts of the 84<sup>th</sup> General Meeting of the American Society for Microbiology. ASM, Washington, D.C.
30. Mangels, J., D. Berkley, and S. Wood. 1984. Abstract C-152. Abstracts of the 84<sup>th</sup> General Meeting of the American Society for Microbiology. ASM, Washington, D.C.
31. Marler, L.M., J.A. Sider, L.C. Wolters, Y. Pettigrew, B.L. Skitt, and S.D. Allen. 1991. J. Clin. Microbiol. 29:874-878.
32. Morgenstern, F. 1984. Abstract C-154. Abstracts of the 84<sup>th</sup> General Meeting of the American Society for Microbiology. ASM, Washington, D.C.
33. Niles, A.C. and P.R. Murray. 1985. Abstract C-161. Abstracts of the 85<sup>th</sup> General Meeting of the American Society for Microbiology. ASM, Washington, D.C.
34. Ristow K.L., P.C. Schreckenberger, D.M. Celig, M.A. Ulanday, and L.J. LeBeau. 1984. Abstract C-151. Abstracts of the 84<sup>th</sup> General Meeting of the American Society for Microbiology. ASM, Washington, D.C.
35. Syed, S., W.J. Loesche, and C. Pearson. 1984. Abstract C-155. Abstracts of the 84<sup>th</sup> General Meeting of the American Society for Microbiology. ASM, Washington, D.C.
36. Clinical and Laboratory Standards Institute. 2008. Quality Control for Commercial Microbial Identification Systems; Approved Guideline. M50-A. CLSI, Wayne, PA.

**CONFEZIONE**

REF R8311002, RapID ANA II System .....Kit per 20 test

**Legenda dei simboli**

|               |                                                         |
|---------------|---------------------------------------------------------|
|               | Contiene materiali sufficienti per < n > test           |
| <b>REF</b>    | Numero di codice                                        |
| <b>IVD</b>    | Dispositivo medico per uso diagnostico <i>in vitro</i>  |
| <b>LAB</b>    | Per uso del laboratorio                                 |
|               | Consultare le istruzioni per l'uso (IFU)                |
|               | Limitazioni per la temperatura (Temp. di conservazione) |
| <b>LOT</b>    | Codice lotto (Numero di lotto)                          |
|               | Da utilizzare entro (Data di scadenza)                  |
| <b>EC REP</b> | Rappresentante autorizzato per l'Europa                 |
|               | Fabbricante                                             |

RapID™ è un marchio di Thermo Fisher Scientific e delle sue sussidiarie.  
 ERIC™ è un marchio di Thermo Fisher Scientific e delle sue sussidiarie.  
 ATCC® è un marchio registrato di American Type Culture Collection.

|               |                                                                                                                                                     |
|---------------|-----------------------------------------------------------------------------------------------------------------------------------------------------|
|               | 12076 Santa Fe Drive<br>Lenexa, KS 66215, USA<br><a href="http://www.remel.com">www.remel.com</a> , (800) 255-6730<br>International: (913) 888-0939 |
| <b>EC REP</b> | Remel Europe Ltd.<br>Clipper Boulevard West, Crossways<br>Dartford, Kent, DA2 6PT, UK                                                               |

Per l'assistenza tecnica, rivolgersi al distributore di zona.  
 IFU R8311002, Data ultima revisione: 2017-06-01

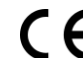

Stampato in U.S.A.

Tavola Differenziale RapID ANA II: Bacilli Gram-negativi

| Organism                                            | URE | BLTS | αARA | ONPG | αGLU | βGLU | αGAL | αFUC | NAG | PO <sub>4</sub> | LGY | GLY | PRO | PAL | ARG | SER | PYR | IND |
|-----------------------------------------------------|-----|------|------|------|------|------|------|------|-----|-----------------|-----|-----|-----|-----|-----|-----|-----|-----|
| <i>Bacteroides caccae</i>                           | 0   | 79   | 98   | 99   | 88   | 96   | 99   | 97   | 99  | 99              | 96  | 91  | 5   | 75  | 98  | 72  | 0   | 0   |
| <i>Bacteroides eggerthii</i>                        | 0   | 39   | 77   | 93   | 99   | 98   | 42   | 0    | 99  | 98              | 97  | 13  | 0   | 0   | 32  | 5   | 0   | 99  |
| <i>Bacteroides fragilis</i>                         | 0   | 89   | 3    | 94   | 98   | 97   | 98   | 98   | 98  | 98              | 98  | 81  | 1   | 79  | 98  | 81  | 74  | 0   |
| <i>Bacteroides ovatus</i>                           | 0   | 95   | 96   | 88   | 98   | 95   | 98   | 93   | 99  | 98              | 96  | 84  | 0   | 0   | 3   | 2   | 0   | 99  |
| <i>Bacteroides stercoris</i>                        | 0   | 45   | 9    | 22   | 99   | 31   | 0    | 70   | 99  | 99              | 98  | 9   | 0   | 0   | 2   | 4   | 0   | 98  |
| <i>Bacteroides pyogenes</i> <sup>a</sup>            | 0   | 9    | 0    | 92   | 99   | 49   | 2    | 93   | 99  | 99              | 99  | 9   | 0   | 13  | 70  | 22  | 0   | 0   |
| <i>Bacteroides thetaiotaomicron</i>                 | 0   | 92   | 91   | 96   | 98   | 96   | 98   | 98   | 98  | 94              | 98  | 67  | 1   | 49  | 98  | 77  | 3   | 99  |
| <i>Bacteroides uniformis</i>                        | 0   | 93   | 81   | 98   | 99   | 97   | 92   | 93   | 99  | 98              | 98  | 6   | 0   | 2   | 3   | 0   | 0   | 99  |
| <i>Bacteroides vulgatus</i>                         | 0   | 3    | 85   | 95   | 99   | 0    | 99   | 99   | 99  | 95              | 98  | 82  | 4   | 1   | 85  | 52  | 84  | 0   |
| <i>Bilophila wadsworthia</i>                        | 91  | 0    | 0    | 0    | 0    | 0    | 0    | 0    | 0   | 2               | 0   | 2   | 0   | 0   | 95  | 1   | 0   | 0   |
| <i>Campylobacter gracilis</i> <sup>b</sup>          | 0   | 0    | 0    | 0    | 0    | 0    | 0    | 0    | 0   | 0               | 0   | 6   | 0   | 0   | 93  | 5   | 0   | 0   |
| <i>Campylobacter ureolyticus</i> <sup>c</sup>       | 99  | 0    | 0    | 0    | 0    | 0    | 0    | 0    | 0   | 0               | 16  | 8   | 5   | 2   | 82  | 6   | 3   | 0   |
| <i>Capnocytophaga</i> spp.                          | 0   | 42   | 0    | 89   | 96   | 86   | 2    | 1    | 78  | 76              | 99  | 99  | 90  | 99  | 99  | 95  | 13  | 0   |
| <i>Fusobacterium mortiferum</i>                     | 0   | 12   | 0    | 62   | 2    | 70   | 92   | 0    | 0   | 92              | 28  | 42  | 0   | 60  | 96  | 86  | 91  | 0   |
| <i>Fusobacterium necrophorum</i>                    | 0   | 0    | 0    | 0    | 0    | 0    | 0    | 0    | 0   | 38              | 0   | 0   | 0   | 0   | 15  | 2   | 0   | 99  |
| <i>Fusobacterium nucleatum</i>                      | 0   | 0    | 0    | 0    | 0    | 0    | 0    | 0    | 0   | 2               | 0   | 0   | 0   | 0   | 45  | 0   | 36  | 99  |
| <i>Fusobacterium varium</i>                         | 0   | 4    | 0    | 0    | 0    | 0    | 8    | 0    | 2   | 0               | 16  | 72  | 2   | 41  | 98  | 88  | 99  | 60  |
| <i>Odoribacter splanchnicus</i> <sup>d</sup>        | 0   | 8    | 4    | 95   | 0    | 8    | 93   | 92   | 99  | 73              | 91  | 14  | 9   | 34  | 99  | 84  | 99  | 99  |
| <i>Parabacteroides distasonis</i> <sup>e</sup>      | 0   | 90   | 67   | 96   | 99   | 91   | 96   | 0    | 99  | 94              | 96  | 94  | 0   | 70  | 98  | 98  | 91  | 0   |
| <i>Parabacteroides merdae</i> <sup>f</sup>          | 0   | 20   | 12   | 99   | 38   | 29   | 99   | 0    | 98  | 22              | 98  | 99  | 0   | 14  | 99  | 25  | 2   | 0   |
| <i>Porphyromonas asaccharolytica</i>                | 0   | 2    | 0    | 0    | 0    | 0    | 0    | 94   | 0   | 96              | 92  | 22  | 0   | 14  | 60  | 45  | 0   | 99  |
| <i>Porphyromonas endodontalis</i>                   | 0   | 0    | 0    | 0    | 0    | 0    | 0    | 0    | 29  | 95              | 98  | 0   | 0   | 0   | 5   | 2   | 0   | 99  |
| <i>Porphyromonas gingivalis</i>                     | 0   | 2    | 0    | 2    | 0    | 0    | 0    | 0    | 99  | 95              | 96  | 19  | 0   | 5   | 93  | 27  | 27  | 99  |
| <i>Prevotella bivia</i>                             | 0   | 2    | 0    | 97   | 99   | 0    | 0    | 91   | 99  | 98              | 98  | 95  | 2   | 4   | 75  | 24  | 0   | 0   |
| <i>Prevotella buccae</i>                            | 0   | 71   | 31   | 91   | 99   | 94   | 99   | 0    | 1   | 99              | 97  | 10  | 0   | 5   | 6   | 0   | 0   | 0   |
| <i>Prevotella buccalis/veroralis</i>                | 0   | 0    | 0    | 99   | 99   | 6    | 99   | 8    | 95  | 99              | 99  | 98  | 0   | 0   | 0   | 0   | 0   | 0   |
| <i>Prevotella corporis</i>                          | 0   | 0    | 0    | 0    | 98   | 0    | 0    | 29   | 0   | 98              | 96  | 0   | 0   | 0   | 98  | 14  | 6   | 0   |
| <i>Prevotella denticola</i>                         | 0   | 0    | 0    | 99   | 99   | 0    | 91   | 99   | 99  | 99              | 99  | 7   | 0   | 0   | 0   | 0   | 0   | 0   |
| <i>Prevotella disiens</i>                           | 0   | 2    | 0    | 0    | 99   | 0    | 7    | 0    | 0   | 99              | 98  | 90  | 0   | 2   | 90  | 29  | 0   | 0   |
| <i>Prevotella intermedia</i>                        | 0   | 0    | 0    | 0    | 99   | 0    | 0    | 93   | 0   | 98              | 98  | 4   | 0   | 0   | 96  | 6   | 0   | 99  |
| <i>Prevotella loescheii</i>                         | 0   | 0    | 0    | 97   | 98   | 79   | 81   | 80   | 99  | 99              | 99  | 9   | 0   | 1   | 4   | 2   | 0   | 0   |
| <i>Prevotella melaninogenica</i>                    | 0   | 1    | 16   | 98   | 92   | 0    | 90   | 92   | 99  | 98              | 99  | 5   | 0   | 0   | 98  | 2   | 0   | 0   |
| <i>Prevotella oralis</i> Group                      | 0   | 92   | 0    | 92   | 96   | 89   | 91   | 78   | 96  | 98              | 98  | 90  | 0   | 0   | 5   | 2   | 0   | 0   |
| <i>Prevotella oris</i>                              | 0   | 98   | 99   | 88   | 99   | 89   | 78   | 98   | 99  | 99              | 98  | 11  | 0   | 0   | 2   | 0   | 0   | 0   |
| <i>Pseudoflavonifractor capillosus</i> <sup>g</sup> | 0   | 87   | 9    | 95   | 30   | 92   | 0    | 98   | 99  | 96              | 90  | 36  | 0   | 0   | 2   | 5   | 0   | 0   |
| <i>Tannerella forsythia</i> <sup>h</sup>            | 0   | 78   | 0    | 95   | 99   | 50   | 0    | 99   | 99  | 99              | 98  | 12  | 0   | 31  | 99  | 81  | 0   | 98  |
| <i>Wolinella</i> spp.                               | 0   | 0    | 0    | 0    | 0    | 5    | 0    | 0    | 0   | 5               | 0   | 0   | 0   | 0   | 88  | 0   | 0   | 0   |

## Gram-Variable Bacilli:

|                                    |   |    |    |    |    |    |    |    |    |    |    |    |    |    |    |   |   |   |
|------------------------------------|---|----|----|----|----|----|----|----|----|----|----|----|----|----|----|---|---|---|
| <i>Clostridium clostridioforme</i> | 0 | 84 | 90 | 84 | 85 | 87 | 98 | 0  | 81 | 2  | 93 | 9  | 1  | 13 | 47 | 2 | 7 | 6 |
| <i>Clostridium ramosum</i>         | 0 | 90 | 0  | 84 | 99 | 99 | 76 | 0  | 99 | 0  | 29 | 2  | 0  | 0  | 33 | 0 | 0 | 0 |
| <i>Mobiluncus curtisii</i>         | 0 | 26 | 2  | 31 | 99 | 5  | 95 | 15 | 0  | 5  | 28 | 32 | 99 | 86 | 90 | 5 | 0 | 0 |
| <i>Mobiluncus mulieris</i>         | 0 | 26 | 2  | 31 | 99 | 5  | 0  | 15 | 0  | 5  | 28 | 32 | 99 | 86 | 90 | 5 | 0 | 0 |
| <i>Tissierella praeacuta</i>       | 0 | 0  | 0  | 0  | 0  | 0  | 0  | 0  | 0  | 85 | 88 | 26 | 0  | 0  | 92 | 0 | 0 | 0 |

<sup>a</sup>Precedentemente denominato *Bacteroides tectum*.<sup>b</sup>Precedentemente denominato *Bacteroides gracilis*.<sup>c</sup>Precedentemente denominato *Bacteroides ureolyticus*.<sup>d</sup>Precedentemente denominato *Bacteroides splanchnicus*.<sup>e</sup>Precedentemente denominato *Bacteroides distasonis*.<sup>f</sup>Precedentemente denominato *Bacteroides merdae*.<sup>g</sup>Precedentemente denominato *Bacteroides capillosus*.<sup>h</sup>Precedentemente denominato *Bacteroides forsythus*.

Tavola Differenziale Rapid ANA II: Bacilli Gram-positivi

| Organism                                          | URE | BLTS | $\alpha$ ARA | ONPG | $\alpha$ GLU | $\beta$ GLU | $\alpha$ GAL | $\alpha$ FUC | NAG | PO <sub>4</sub> | LGY | GLY | PRO | PAL | ARG | SER | PYR | IND |
|---------------------------------------------------|-----|------|--------------|------|--------------|-------------|--------------|--------------|-----|-----------------|-----|-----|-----|-----|-----|-----|-----|-----|
| <i>Actinomyces bovis</i>                          | 0   | 0    | 0            | 0    | 0            | 12          | 0            | 0            | 99  | 0               | 99  | 99  | 99  | 86  | 99  | 99  | 0   | 0   |
| <i>Actinomyces israelii</i>                       | 0   | 29   | 61           | 87   | 99           | 97          | 93           | 0            | 2   | 2               | 86  | 92  | 99  | 98  | 98  | 64  | 19  | 0   |
| <i>Actinomyces meyeri</i>                         | 0   | 2    | 0            | 69   | 93           | 0           | 0            | 0            | 79  | 0               | 92  | 98  | 99  | 78  | 98  | 96  | 38  | 0   |
| <i>Actinomyces naeslundii</i>                     | 90  | 15   | 0            | 96   | 86           | 96          | 93           | 0            | 0   | 15              | 57  | 80  | 97  | 87  | 65  | 10  | 0   | 0   |
| <i>Actinomyces odontolyticus</i>                  | 0   | 4    | 15           | 86   | 96           | 46          | 5            | 92           | 5   | 20              | 92  | 98  | 99  | 82  | 98  | 98  | 0   | 0   |
| <i>Actinomyces turicensis</i>                     | 0   | 0    | 0            | 0    | 99           | 0           | 0            | 28           | 0   | 0               | 88  | 91  | 96  | 90  | 99  | 96  | 0   | 0   |
| <i>Actinomyces viscosus</i>                       | 81  | 76   | 0            | 91   | 99           | 92          | 62           | 0            | 0   | 0               | 76  | 98  | 99  | 86  | 92  | 33  | 0   | 0   |
| <i>Arcanobacterium pyogenes</i> <sup>a</sup>      | 0   | 12   | 15           | 86   | 0            | 0           | 0            | 0            | 99  | 75              | 93  | 96  | 96  | 86  | 98  | 96  | 2   | 0   |
| <i>Atopobium minutum</i> <sup>b</sup>             | 0   | 0    | 0            | 0    | 0            | 26          | 99           | 0            | 0   | 0               | 0   | 12  | 0   | 0   | 98  | 33  | 0   | 0   |
| <i>Bifidobacterium</i> spp.                       | 0   | 79   | 87           | 90   | 99           | 87          | 92           | 0            | 2   | 2               | 11  | 74  | 93  | 95  | 98  | 93  | 0   | 0   |
| <i>Clostridium baratii</i>                        | 0   | 88   | 0            | 87   | 16           | 76          | 93           | 0            | 96  | 0               | 0   | 0   | 0   | 0   | 82  | 0   | 97  | 0   |
| <i>Clostridium beijerinckii</i>                   | 0   | 42   | 0            | 51   | 99           | 98          | 79           | 0            | 0   | 0               | 0   | 0   | 0   | 0   | 0   | 0   | 0   | 0   |
| <i>Clostridium bifermentans</i>                   | 0   | 0    | 0            | 0    | 2            | 0           | 0            | 2            | 68  | 4               | 0   | 5   | 99  | 38  | 86  | 88  | 3   | 94  |
| <i>Clostridium botulinum</i> F                    | 0   | 0    | 0            | 0    | 82           | 26          | 0            | 0            | 0   | 0               | 0   | 0   | 99  | 98  | 98  | 98  | 0   | 0   |
| <i>Clostridium botulinum</i> I <sup>c</sup>       | 0   | 0    | 0            | 0    | 99           | 0           | 0            | 0            | 60  | 9               | 0   | 0   | 0   | 0   | 0   | 0   | 0   | 0   |
| <i>Clostridium butyricum</i>                      | 0   | 9    | 85           | 91   | 98           | 0           | 99           | 2            | 0   | 0               | 0   | 0   | 3   | 0   | 9   | 6   | 0   | 0   |
| <i>Clostridium cadaveris</i>                      | 0   | 0    | 0            | 0    | 0            | 0           | 0            | 94           | 99  | 0               | 2   | 7   | 0   | 7   | 87  | 9   | 98  | 99  |
| <i>Clostridium clostridioforme</i>                | 0   | 84   | 90           | 84   | 85           | 87          | 98           | 0            | 81  | 2               | 93  | 9   | 1   | 13  | 47  | 2   | 7   | 6   |
| <i>Clostridium difficile</i>                      | 0   | 2    | 0            | 2    | 8            | 3           | 0            | 0            | 0   | 9               | 2   | 0   | 99  | 43  | 48  | 16  | 6   | 0   |
| <i>Clostridium glycolicum</i>                     | 0   | 0    | 0            | 10   | 0            | 16          | 0            | 0            | 9   | 99              | 0   | 2   | 99  | 0   | 35  | 9   | 46  | 0   |
| <i>Clostridium hastiforme</i>                     | 0   | 0    | 1            | 0    | 0            | 0           | 0            | 0            | 5   | 2               | 88  | 62  | 92  | 72  | 95  | 98  | 0   | 0   |
| <i>Clostridium histolyticum</i>                   | 0   | 0    | 0            | 9    | 0            | 0           | 0            | 0            | 0   | 0               | 3   | 9   | 0   | 98  | 96  | 91  | 98  | 0   |
| <i>Clostridium innocuum</i>                       | 0   | 5    | 0            | 0    | 20           | 36          | 5            | 0            | 18  | 5               | 2   | 11  | 0   | 76  | 90  | 7   | 80  | 0   |
| <i>Clostridium limosum</i>                        | 0   | 0    | 0            | 0    | 0            | 0           | 0            | 0            | 0   | 0               | 0   | 0   | 0   | 20  | 11  | 0   | 0   | 0   |
| <i>Clostridium novyi</i> A                        | 0   | 0    | 0            | 0    | 0            | 0           | 0            | 0            | 0   | 59              | 0   | 0   | 0   | 0   | 47  | 0   | 0   | 0   |
| <i>Clostridium paraputrificum</i>                 | 0   | 51   | 2            | 99   | 9            | 94          | 5            | 0            | 96  | 6               | 0   | 0   | 0   | 0   | 5   | 0   | 94  | 0   |
| <i>Clostridium perfringens</i>                    | 0   | 39   | 69           | 98   | 76           | 36          | 96           | 18           | 98  | 81              | 2   | 26  | 4   | 80  | 92  | 43  | 96  | 0   |
| <i>Clostridium ramosum</i>                        | 0   | 90   | 0            | 84   | 99           | 99          | 76           | 0            | 99  | 0               | 29  | 2   | 0   | 0   | 33  | 0   | 0   | 0   |
| <i>Clostridium septicum</i>                       | 0   | 2    | 16           | 99   | 14           | 0           | 2            | 0            | 99  | 0               | 0   | 0   | 0   | 0   | 10  | 9   | 5   | 0   |
| <i>Clostridium sordellii</i>                      | 98  | 0    | 0            | 0    | 26           | 0           | 0            | 42           | 0   | 28              | 9   | 24  | 99  | 79  | 98  | 92  | 27  | 98  |
| <i>Clostridium sporogenes</i>                     | 0   | 0    | 0            | 7    | 39           | 32          | 0            | 0            | 0   | 2               | 2   | 5   | 99  | 15  | 9   | 16  | 92  | 0   |
| <i>Clostridium subterminale</i>                   | 0   | 0    | 0            | 2    | 0            | 5           | 0            | 36           | 0   | 3               | 63  | 33  | 3   | 36  | 80  | 69  | 94  | 0   |
| <i>Clostridium tertium</i>                        | 0   | 84   | 76           | 98   | 47           | 26          | 96           | 2            | 99  | 8               | 0   | 0   | 11  | 0   | 91  | 5   | 8   | 0   |
| <i>Clostridium tetani</i>                         | 0   | 0    | 0            | 0    | 0            | 0           | 0            | 0            | 0   | 13              | 0   | 0   | 0   | 0   | 66  | 0   | 0   | 26  |
| <i>Collinsella aerofaciens</i> <sup>d</sup>       | 0   | 77   | 9            | 2    | 76           | 10          | 5            | 0            | 20  | 13              | 5   | 9   | 93  | 26  | 97  | 56  | 0   | 0   |
| <i>Eggerthella lenta</i> <sup>e</sup>             | 0   | 0    | 0            | 0    | 3            | 0           | 0            | 0            | 2   | 0               | 0   | 11  | 1   | 5   | 97  | 73  | 0   | 0   |
| <i>Eubacterium limosum</i>                        | 0   | 0    | 0            | 0    | 0            | 7           | 0            | 0            | 0   | 12              | 95  | 18  | 9   | 16  | 5   | 0   | 0   | 0   |
| <i>Lactobacillus acidophilus</i>                  | 0   | 81   | 0            | 21   | 91           | 99          | 12           | 0            | 73  | 0               | 99  | 98  | 90  | 76  | 98  | 98  | 78  | 0   |
| <i>Lactobacillus casei</i>                        | 0   | 89   | 0            | 70   | 78           | 96          | 0            | 22           | 99  | 5               | 82  | 97  | 80  | 16  | 98  | 90  | 90  | 0   |
| <i>Lactobacillus catenaforme</i>                  | 0   | 5    | 0            | 9    | 99           | 99          | 5            | 0            | 93  | 0               | 0   | 71  | 0   | 0   | 98  | 0   | 88  | 0   |
| <i>Lactobacillus fermentum</i>                    | 0   | 26   | 2            | 96   | 86           | 0           | 99           | 0            | 0   | 0               | 5   | 81  | 0   | 88  | 98  | 96  | 0   | 0   |
| <i>Lactobacillus jensenii</i>                     | 0   | 71   | 1            | 0    | 82           | 99          | 2            | 0            | 5   | 0               | 0   | 93  | 99  | 98  | 98  | 95  | 0   | 0   |
| <i>Mobiluncus curtisii</i>                        | 0   | 19   | 0            | 12   | 99           | 5           | 95           | 11           | 0   | 5               | 26  | 30  | 99  | 80  | 95  | 3   | 0   | 0   |
| <i>Mobiluncus mulieris</i>                        | 0   | 26   | 2            | 31   | 99           | 5           | 0            | 15           | 0   | 3               | 27  | 32  | 99  | 85  | 90  | 5   | 0   | 0   |
| <i>Propionibacterium acnes</i>                    | 0   | 0    | 0            | 5    | 52           | 0           | 0            | 0            | 88  | 2               | 96  | 98  | 98  | 48  | 98  | 96  | 71  | 85  |
| <i>Propionibacterium granulosum</i>               | 0   | 0    | 5            | 0    | 82           | 0           | 67           | 0            | 0   | 0               | 98  | 98  | 99  | 33  | 96  | 60  | 0   | 0   |
| <i>Propionibacterium propionicum</i> <sup>f</sup> | 0   | 18   | 2            | 78   | 99           | 0           | 99           | 12           | 0   | 0               | 75  | 75  | 65  | 88  | 98  | 12  | 0   | 0   |

<sup>a</sup>Precedentemente denominato *Actinomyces pyogenes*.<sup>b</sup>Precedentemente denominato *Lactobacillus minutis*<sup>c</sup>*C. botulinum* di Gruppo I comprende ceppi produttori di tossina di tipo A e ceppi proteolitici produttori di tossine di tipo B e F.<sup>d</sup>*C. botulinum* di Gruppo II comprende ceppi produttori di tossina di tipo E e ceppi non-proteolitici produttori di tossine di tipo B e F.<sup>e</sup>Precedentemente denominato *Eubacterium aerofaciens*.<sup>f</sup>Precedentemente denominato *Eubacterium lentum*.<sup>g</sup>Precedentemente denominato *Propionibacterium propionicus*.

# remel

## Sistema RapID ANA II

### USO PREVISTO

El sistema RapID™ ANA II de Remel es un micrométodo cuantitativo que utiliza sustratos convencionales y cromogénicos para la identificación de bacterias anaerobias médicamente importantes aisladas en muestras clínicas humanas. El uso del sistema RapID ANA II para la identificación y diferenciación de bacterias anaerobias de origen veterinario no está bien establecido. La relación completa de microorganismos detectados por el sistema RapID ANA II se incluye en los diagramas diferenciales RapID ANA II.

### RESUMEN Y EXPLICACIÓN

El sistema RapID ANA II está formado por (1) los paneles RapID ANA II y por (2) el reactivo RapID ANA II. Cada panel RapID ANA II tiene varios pocillos de reacción moldeados en la periferia de una bandeja de plástico desechable. Los pocillos de reacción contienen reactantes deshidratados y la bandeja permite la inoculación simultánea de cada uno de ellos con una cantidad predeterminada de inóculo. Como inóculo que rehidrata e inicia las reacciones de prueba se usa una suspensión del microorganismo de prueba en el líquido de inoculación RapID. Después de incubar el panel, se examina la reactividad de cada pocillo de prueba observando el desarrollo de un color. En algunos casos, se deben añadir reactivos a los pocillos para obtener el cambio de color. La combinazione dei valori positivi e negativi ottenuta dal test viene utilizzata per identificare il microrganismo, e viene confrontata con gli schemi di reattività contenuti in un database utilizzando l'Electronic RapID Compendium (ERIC™) o la Tabella Differenziale RapID ANA II.

### PRINCIPIO DE LA PRUEBA

Las pruebas usadas en el sistema RapID ANA II se basan en la degradación microbiana de sustratos específicos detectados por varios sistemas indicadores. Los reactivos utilizados son una combinación de pruebas convencionales y pruebas cromogénicas de monosustrato, y se describen más adelante en la Tabla 1.

### REACTIVOS\*

**Reactivo RapID ANA II** (se incluye en el estuche) (15 ml/frasco)

Ingrediente de los reactivos por litro:

p-dimetilaminocinamaldehído .....0,06 g

**Líquido de inoculación RapID** (R8325102, se suministra por separado) (1 ml/tubo)

KCl..... 6,0 g

CaCl<sub>2</sub> ..... 0,5 g

Agua desmineralizada .....1000,0ml

**Reactivo RapID Spot Indole** (R8309002, se suministra por separado) (15 ml/frasco)

p-dimetilaminocinamaldehído .....10,0 g

Ácido clorhídrico.....100,0ml

Agua desmineralizada .....900,0ml

\*Ajustado según necesidades para cumplir los estándares de funcionamiento.

### PRECAUCIONES

Este producto sólo es para uso diagnóstico *in vitro* y debe ser utilizado por personal con la formación adecuada. Se tomarán precauciones frente a los riesgos microbiológicos esterilizando correctamente las muestras, envases, medios y paneles de prueba después de su uso. Se deben leer y seguir atentamente las instrucciones.

#### ¡Precaución!

1. El reactivo RapID ANA II es tóxico y puede provocar daños al medio ambiente. Peligroso por inhalación, por contacto con la piel o los ojos, o por ingestión. Puede alterar la fertilidad o provocar daños al feto.
2. El reactivo RapID Spot Indole puede irritar la piel, los ojos y el aparato respiratorio.
3. Consulte una información más detallada en la Hoja de Datos de Seguridad del Material sobre productos químicos.

#### Composición/información sobre ingredientes

**2-Metoxietanol 109-86-4**  
**Ácido acético 64-19-7**  
**Ácido clorhídrico 7647-01-0**

#### Indicaciones de advertencia

#### PELIGRO

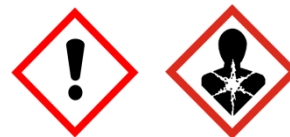

Solo EE.UU

EE.UU y UE

#### Indicaciones de riesgos

Provoca irritación en la piel

Provoca irritación grave en los ojos

Puede causar irritación en las vías respiratorias

Puede provocar somnolencia y vértigo

Puede afectar a la fertilidad. Puede resultar dañino para el feto

Puede causar daños a los órganos tras una exposición prolongada o continua

Exposición

#### Indicaciones de precaución

Prevención

Consulte instrucciones específicas antes del uso

No manipule el producto hasta que haya leído y comprendido todas las precauciones de seguridad

Utilice los equipos de protección personal exigidos

Lávese bien el rostro, las manos y cualquier parte del cuerpo expuesta tras la manipulación

Manipulación

Use protección ocular y facial

No inhale polvo/humo/gas/niebla/vapores/aerosoles

Use solo en espacios abiertos o bien ventilados

#### Respuesta ante emergencias

EN CASO DE exposición real o supuesta: consulte/acuda a un médico

#### Inhalación

EN CASO DE INHALACIÓN: traslade a la persona al aire libre y manténgala en una posición cómoda para respirar.

#### Piel

EN CASO DE CONTACTO CON LA PIEL: lávese abundantemente con agua y jabón

En caso de irritación de la piel: consulte/acuda a un médico

Cambie la vestimenta contaminada y lávela antes de volver a utilizarla

#### Ojos

EN CASO DE CONTACTO CON LOS OJOS: enjuague cuidadosamente con agua durante varios minutos. Qúitese las lentillas si las lleva puestas y puede hacerlo con facilidad. Continúe enjuagando Si la irritación en los ojos persiste: consulte a un médico

#### Almacenamiento

Almacene bajo llave

Almacene en lugares correctamente ventilados. Mantenga el envase bien cerrado

#### Desecho

Deseche el contenido/recipiente en una planta de eliminación de residuos aprobada

#### Peligros no clasificados

No se conocen

**ADVERTENCIA:** Este producto contiene un componente químico conocido en el estado de California por provocar anomalías congénitas y otros daños reproductivos.

#### Teléfono de emergencia

INFOTRAC - Teléfono de emergencia 24 horas: 1-800-535-5053

Fuera de los Estados Unidos llame al teléfono de emergencia disponible 24 horas: 001-352-323-3500 (llamada a cobro revertido)

#### ALMACENAMIENTO

El sistema RapID ANA II y el reactivo RapID Spot Indole deben almacenarse en sus envases originales a 2-8°C hasta su uso. Dejar estabilizar el producto a temperatura ambiente antes de su uso. NO intercambiar con reactivos de distintos sistemas RapID. Extraer sólo el número de paneles necesario para el estudio. Volver a sellar la bolsa de plástico y devolverla rápidamente a su almacenamiento a 2-8°C. Los paneles deben usarse el mismo día que se extraen de su almacenamiento. El líquido de

## SPANISH

inoculación RapID debe almacenarse en su envase original a temperatura ambiente (20-25°C) hasta su uso.

### DETERIORO DEL PRODUCTO

Este producto no se debe usar si (1) el color del reactivo ha cambiado, (2) se ha superado la fecha de caducidad, (3) la bandeja de plástico está rota o la tapa está dañada, o (4) hay otros signos de deterioro.

### OBTENCIÓN, ALMACENAMIENTO Y TRANSPORTE DE LA MUESTRA

Las muestras se deben usar y manipular de acuerdo con las recomendaciones siguientes.<sup>19,20</sup>

### MATERIALES SUMINISTRADOS

(1) 20 paneles RapID ANA II, (2) 20 formularios de resultados, (3) reactivo RapID ANA II (un frasco cuentagotas de plástico que contiene suficiente reactivo para 20 paneles), (4) 2 bandejas de incubación de cartón, (5) Instrucciones de uso (IFU).

### Símbolos del contenido

|                         |                               |
|-------------------------|-------------------------------|
| <b>ANA II Panels</b>    | Paneles ANA II                |
| <b>Report Forms</b>     | Formularios de informes RapID |
| <b>ANA II Reagent</b>   | Reactivo ANA II               |
| <b>Incubation Trays</b> | Bandejas de incubación        |

### MATERIALES NECESARIOS PERO NO SUMINISTRADOS

(1) Dispositivo de esterilización en asa, (2) Asa de inoculación, torunda, envases para las muestras, (3) Incubadoras, sistemas ambientales alternativos, (4) Medio suplementario, (5) Microorganismos para control de calidad, (6) Reactivos para la tinción de Gram, (7) Portamuestras para el microscopio, (8) Torundas de algodón, (9) Líquido de inoculación RapID - 1 ml (R8325102), (10) Estándar de turbidez McFarland del N° 3 o equivalente (R20413), (11) Pipetas, (12) Reactivo RapID Spot Indole (R8309002), (13) ERIC (compendio electrónico RapID, R8323600).

Tabla 1. Principios y componentes del sistema RapID ANA II

| Nº de pocillo                            | Código de la prueba | Ingredientes de los reactivos           | Cantidad | Principio                                                                                                         | Bibliografía |
|------------------------------------------|---------------------|-----------------------------------------|----------|-------------------------------------------------------------------------------------------------------------------|--------------|
| <b>Antes de la adición del reactivo:</b> |                     |                                         |          |                                                                                                                   |              |
| 1                                        | URE                 | Urea                                    | 0,4%     | La hidrólisis de la urea produce productos alcalinos que aumentan el pH y cambian el indicador.                   | 1-3          |
| 2                                        | BLTS                | p-nitrofenil-β,D-disacárido             | 0,1%     | La hidrólisis enzimática del glucósido incoloro aril-sustituido o fosfoéster libera amarillo σ- o p-nitrofenol.   | 4-8          |
| 3                                        | αARA                | p-nitrofenil-α,L-arabinósido            | 0,1%     |                                                                                                                   |              |
| 4                                        | ONPG                | σ-nitrofenil-β,D-galactósido            | 0,1%     |                                                                                                                   |              |
| 5                                        | αGLU                | p-nitrofenil-α,D-glucósido              | 0,1%     |                                                                                                                   |              |
| 6                                        | βGLU                | p-nitrofenil-β,D-glucósido              | 0,08%    |                                                                                                                   |              |
| 7                                        | αGAL                | p-nitrofenil-α,D-galactósido            | 0,08%    |                                                                                                                   |              |
| 8                                        | αFUC                | p-nitrofenil-α,L-fucósido               | 0,08%    |                                                                                                                   |              |
| 9                                        | NAG                 | p-nitrofenil-n-acetil-β,D-glucosaminida | 0,1%     |                                                                                                                   |              |
| 10                                       | PO <sub>4</sub>     | p-nitrofenilfosfato                     | 0,1%     |                                                                                                                   |              |
| <b>Después de añadir el reactivo:</b>    |                     |                                         |          |                                                                                                                   |              |
| 3                                        | LGY                 | Leucil-glicina-β-naftilamida            | 0,08%    | La hidrólisis enzimática del sustrato arilamida libera β-naftilamina que se detecta con el reactivo RapID ANA II. | 6, 8-14      |
| 4                                        | GLY                 | Glicina-β-naftilamida                   | 0,08%    |                                                                                                                   |              |
| 5                                        | PRO                 | Prolina-β-naftilamida                   | 0,08%    |                                                                                                                   |              |
| 6                                        | PAL                 | Fenilalanina-β-naftilamida              | 0,05%    |                                                                                                                   |              |
| 7                                        | ARG                 | Arginina-β-naftilamida                  | 0,05%    |                                                                                                                   |              |
| 8                                        | SER                 | Serina-β-naftilamida                    | 0,08%    |                                                                                                                   |              |
| 9                                        | PYR                 | Pirrolidonil-β-naftilamida              | 0,08%    |                                                                                                                   |              |
| 10                                       | IND                 | Triptófano                              | 0,01%    | Al usar el sustrato se forma indol, que se detecta con el reactivo RapID Spot Indole.                             | 15, 16       |

**PROCEDIMIENTO DE LA PRUEBA**

**Preparación del inóculo:**

1. Los microorganismos en estudio deben cultivarse en un medio de cultivo puro en ambiente anaerobio y examinarse con la tinción de Gram antes de usar el sistema.
2. Los microorganismos estudiados pueden extraerse en varios medios de crecimiento selectivos y no selectivos con agar. Se recomienda usar los siguientes medios:

Medios no selectivos: Agar sangre anaerobio de los CDC; Agar sangre de oveja al 5-7% preparado con una base Brucella, Columbia, Infusión de cerebro-corazón, Lombard-Dowell o tripsina de soja.

Medios diferenciales o selectivos: Agar con alcohol feniletílico (PEA); agar con yema de huevo (EYA); agar con paromomicina/vancomicina (PV); agar con kanamicina/vancomicina (KV).

**Notas:**

- NO se debe usar “agar reducible” que contenga cloruro de paladio u otros agentes reductores, ya que éstos pueden interferir con algunas actividades enzimáticas.
  - NO se recomienda usar agar kanamicina con bilis esculina (KBE) y agar bacteroides con bilis esculina (BBE), ya que el complejo férrico-esculetina que se puede formar puede interferir con la interpretación de la prueba.
  - NO se recomienda usar algunos medios que contengan o se suplementen con mono o disacáridos, ya que pueden suprimir la actividad glucolítica y reducir la reactividad de la prueba. La mayoría de formulaciones de agar Schaedler contienen suficiente dextrosa para interferir con la actividad glucosidasa.
  - Las placas usadas para preparar los inóculos deben tener menos de 72 horas (preferiblemente, entre 18 y 24 horas).
  - El uso de medios distintos de los recomendados puede comprometer el funcionamiento de la prueba.
3. Con una torunda de algodón o un asa de inoculación, suspender suficiente crecimiento del cultivo en la placa de agar en el líquido de inoculación RapID (1 ml) para conseguir una suspensión del microorganismo en estudio igual al estándar de turbidez N° 3 de McFarland o equivalente.

**Notas:**

- Las suspensiones con una turbidez significativamente menor que el estándar N° 3 de McFarland provocarán reacciones aberrantes.
  - Las suspensiones bacterianas que son **ligeramente** más turbias que el estándar N° 3 de McFarland no afectarán al funcionamiento de la prueba y se recomiendan para los cultivos madre y las cepas de control de calidad. No obstante, las suspensiones preparadas con una turbidez bastante mayor que el estándar N° 3 de McFarland comprometerán el funcionamiento de la prueba.
  - Las suspensiones se deben mezclar bien, con vortex si es preciso.
  - Las suspensiones se deben usar en los 15 minutos siguientes a su preparación.
4. Puede inocularse otra placa de agar para comprobar la pureza y cualquier otro estudio adicional que pueda ser necesario, usando un asa llena de la suspensión de prueba del tubo de líquido de inoculación. Incubar la placa en un ambiente anaerobio al menos durante 18-24 horas a 35-37°C.

**Inoculación de los paneles RapID ANA II:**

1. Abra la tapa del panel sobre el acceso de inoculación, tirando de la pestaña marcada “Peel to Inoculate” hacia arriba y hacia la izquierda.
2. Con una pipeta, transfiera con cuidado el contenido de **todo** el tubo de líquido de inoculación en la esquina superior derecha del panel. Vuelva a sellar el acceso de inoculación del panel, presionando la pestaña de nuevo en su lugar.
3. Después de añadir la suspensión de prueba, y mientras se mantiene el panel sobre una superficie nivelada, incline el panel hacia el lado contrario a los pocillos de prueba, aproximadamente en un ángulo de 45° (véase más adelante).

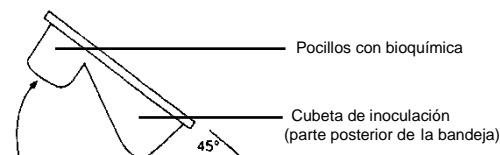

4. Mientras se inclina, debe mecarse suavemente el panel de lado a lado para distribuir homogéneamente el inóculo a lo largo de las depresiones posteriores, como se muestra en la imagen.

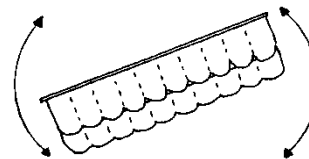

5. Mientras se mantiene en posición horizontal nivelada (que se consigue mejor usando la parte superior de la mesa de trabajo contra el fondo de los pocillos), debe inclinarse lentamente el panel hacia delante, hacia los pocillos de reacción, hasta que el inóculo fluya a lo largo de las depresiones de los pocillos de reacción (véase más adelante). De esta manera, todo el inóculo de la parte posterior del panel será evacuado.

**Nota:** Si se inclina demasiado el panel, puede quedar aire atrapado en la unión de los pocillos de prueba y limitar el movimiento del líquido.

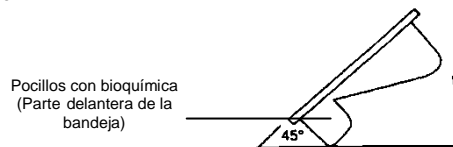

6. Vuelva el panel a su posición nivelada. Si es necesario, dé unos golpes suaves con el panel sobre la mesa para eliminar el aire atrapado en los pocillos.

**Notas:**

- Examine los pocillos de prueba. Éstos deben aparecer sin burbujas y uniformemente llenos. Se aceptan ligeras irregularidades en el llenado de los pocillos de prueba que no afectarán a su funcionamiento. Si el panel está claramente mal llenado, se debe inocular un nuevo panel y desecharse el erróneo.
- Complete la inoculación de cada panel que reciba el líquido de inoculación antes de inocular nuevos paneles.
- No deje que el inóculo repose en la parte posterior del panel durante mucho tiempo sin completar el procedimiento.

**Incubación de los paneles RapID ANA II:**

Incube los paneles inoculados a 35-37°C en una incubadora sin CO<sub>2</sub> durante 4 horas como mínimo y durante 6 como máximo. Para facilitar la manipulación, los paneles se pueden incubar en las bandejas de incubación de cartón que se incluyen en el estuche.

**Nota:** Si se desea, después de un periodo de incubación de 4-6 horas y antes de añadir los reactivos, los paneles RapID ANA II pueden colocarse en el refrigerador (2-8°C) toda la noche para su lectura a la mañana siguiente.

**Puntuación de los paneles RapID ANA II:**

Los paneles RapID ANA II contienen 10 pocillos de reacción que proporcionan 18 puntuaciones de prueba. Los pocillos de prueba 3 a 10 son bifuncionales y contienen dos pruebas independientes en el mismo pocillo. Las pruebas bifuncionales se puntúan primero antes de añadir el reactivo que da el primer resultado de la prueba, y luego se vuelve a puntuar el mismo pocillo después de añadir el reactivo que da el segundo resultado de la prueba. Los pocillos de prueba bifuncionales 3 a 9, que requieren reactivo RapID ANA II, están marcados con la primera prueba por encima de la barra y la segunda prueba, por debajo. La prueba bifuncional 10, que usa el reactivo RapID Spot Indole, está marcada con un recuadro alrededor de la prueba que necesita el reactivo.

**Situación en el panel de prueba RapID ANA II**

| Nº de pocillo       | 1   | 2    | 3           | 4           | 5           | 6           | 7           | 8           | 9          | 10                     |
|---------------------|-----|------|-------------|-------------|-------------|-------------|-------------|-------------|------------|------------------------|
| Código de la prueba | URE | BLTS | αARA<br>LGY | ONPG<br>GLY | αGLU<br>PRO | βGLU<br>PAL | αGAL<br>ARG | αFUC<br>SER | NAG<br>PYR | PO <sub>4</sub><br>IND |

1. Mientras sujeta firmemente el panel RapID ANA II en la mesa, retire la tapa que cubre los pocillos de reacción tirando de la pestaña inferior derecha hacia arriba y hacia la izquierda.
2. Sin añadir reactivos, lea y puntúe los pocillos 1 (URE) a 10 (PO<sub>4</sub>) de izquierda a derecha usando la guía de interpretación que se incluye en la Tabla 2. Registre las puntuaciones de las pruebas en los recuadros adecuados del formulario de resultados, usando el código

**SPANISH**

- de prueba que se encuentra encima de la barra para pruebas bifuncionales.
- Añada dos gotas del reactivo RapID Spot Indole al pocillo 1 (IND).  
**Nota:** Sólo se debe usar el reactivo RapID Spot Indole. Los reactivos de Kovac o de Ehrlich no consiguen resultados satisfactorios.
  - Añada 2 gotas del reactivo RapID ANA II a los pocillos 3 (LGY) a 9 (PYR).

- Deje 30 segundos como mínimo y 2 minutos como máximo para el desarrollo del color. Lea y puntúe los pocillos 3 a 10 Registre las puntuaciones en los recuadros adecuados del formulario de resultados usando los códigos de prueba que hay debajo de la barra para pruebas bifuncionales.
- Consulte el microcódigo obtenido en el formulario de resultados ERIC.

**Tabla 2. Interpretación de las pruebas del sistema RapID ANA II\***

| Nº de pocillo                           | Código de la prueba | Reactivo                   | Reacción                             |                                             | Comentario                                                                                                    |
|-----------------------------------------|---------------------|----------------------------|--------------------------------------|---------------------------------------------|---------------------------------------------------------------------------------------------------------------|
|                                         |                     |                            | Positivo                             | Negativo                                    |                                                                                                               |
| <b>Antes de la adición del reactivo</b> |                     |                            |                                      |                                             |                                                                                                               |
| 1                                       | URE                 | Ninguno                    | Rojo o púrpura                       | Amarillo o naranja                          | Los matices naranja o naranja-rojizos se puntuarán como negativos.                                            |
| 2                                       | BLTS                | Ninguno                    | Amarillo medio o brillante           | Amarillo transparente, tostado o muy pálido | Sólo el desarrollo de un amarillo evidente es un resultado positivo.                                          |
| 3                                       | αARA                |                            |                                      |                                             |                                                                                                               |
| 4                                       | ONPG                |                            |                                      |                                             |                                                                                                               |
| 5                                       | αGLU                |                            |                                      |                                             |                                                                                                               |
| 6                                       | βGLU                |                            |                                      |                                             |                                                                                                               |
| 7                                       | αGAL                |                            |                                      |                                             |                                                                                                               |
| 8                                       | αFUC                |                            |                                      |                                             |                                                                                                               |
| 9                                       | NAG                 |                            |                                      |                                             |                                                                                                               |
| 10                                      | PO <sub>4</sub>     |                            |                                      |                                             |                                                                                                               |
| <b>Después de añadir el reactivo</b>    |                     |                            |                                      |                                             |                                                                                                               |
| 3                                       | LGY                 | Reactivo RapID ANA II      | Púrpura, violeta, rojo o rosa oscuro | Amarillo, naranja o rosa pálido             | Dejar 30 segundos como mínimo o 2 minutos como máximo para el desarrollo del color.                           |
| 4                                       | GLY                 |                            |                                      |                                             |                                                                                                               |
| 5                                       | PRO                 |                            |                                      |                                             |                                                                                                               |
| 6                                       | PAL                 |                            |                                      |                                             |                                                                                                               |
| 7                                       | ARG                 |                            |                                      |                                             |                                                                                                               |
| 8                                       | SER                 | Reactivo RapID Spot Indole | Azul o verde azulado                 | Cualquier otro color                        | Cualquier matiz de color azul o verde azulado se puntuará como positivo, independientemente de su intensidad. |
| 9                                       | PYR                 |                            |                                      |                                             |                                                                                                               |
| 10                                      | IND                 |                            |                                      |                                             |                                                                                                               |

\*NOTA: Los paneles se deben leer mirando hacia abajo los pocillos de reacción contra un fondo blanco.

**RESULTADOS E INTERVALO DE VALORES ESPERADOS**

Los diagramas diferenciales RapID ANA II ilustran los resultados esperados con el sistema RapID ANA II. Los resultados de los diagramas diferenciales se expresan como una serie de porcentajes positivos para cada prueba del sistema. Esta información apoya estadísticamente el uso de cada prueba y proporciona la base del abordaje probabilístico para identificar el aislamiento de prueba, mediante un código numérico de los resultados de la prueba digital.

Las identificaciones se hacen con las puntuaciones individuales de la prueba en los paneles RapID ANA II junto con otra información de laboratorio (como tinción de Gram, tolerancia a la aerobiosis, o crecimiento en un medio diferencial o selectivo) para producir un patrón que imite estadísticamente la reactividad conocida de los géneros registrados en la base de datos RapID. Estos patrones se comparan mediante los diagramas diferenciales RapID ANA II o a partir de un microcódigo y el uso ERIC.

**CONTROL DE CALIDAD**

Todos los números de lote del sistema RapID ANA II se han estudiado usando los siguientes microorganismos de control de calidad, y los resultados son aceptables. El estudio de los microorganismos de control se debe realizar de acuerdo con los procedimientos de control de calidad establecidos en el laboratorio.

Si se observan resultados anómalos en el control de calidad, no se informará de los resultados de ese paciente. En la Tabla 3 se exponen los resultados de una batería seleccionada de microorganismos de prueba.

**Notas:**

- El control de calidad del reactivo se realiza obteniendo las reacciones esperadas en las pruebas que necesitan la adición de los reactivos (pocillos 3-10).
- Los microorganismos que se han transferido repetidamente a un medio de agar durante periodos prolongados pueden dar resultados anómalos.
- Las cepas de control de calidad se almacenarán congeladas o liofilizadas. Antes de su uso, las cepas de control de calidad se deben pasar 2-3 veces desde su almacenamiento al medio de agar recomendado para usar con el sistema RapID ANA II.
- Las formulaciones, los aditivos y los ingredientes del medio de cultivo varían en el producto de cada fabricante y pueden variar en cada lote. En consecuencia, el medio de cultivo puede influir en la actividad enzimática constitutiva de las cepas de control de calidad designadas. Si los resultados de la cepa de control de calidad difieren de los patrones indicados, un subcultivo en un medio de otro lote o de otro fabricante resolverá a menudo las discrepancias del control de calidad.

**Tabla 3. Diagrama de control de calidad para los paneles RapID ANA II**

| Microorganismo                                               | Antes de la adición del reactivo |      |      |      |      |      |      |      |     |                 | Después de la adición del reactivo RapID ANA II |     |     |     |     |     |     | Spot Indole |
|--------------------------------------------------------------|----------------------------------|------|------|------|------|------|------|------|-----|-----------------|-------------------------------------------------|-----|-----|-----|-----|-----|-----|-------------|
|                                                              | URE                              | BLTS | αARA | ONPG | αGLU | βGLU | αGAL | αFUC | NAG | PO <sub>4</sub> | LGY                                             | GLY | PRO | PAL | ARG | SER | PYR |             |
| <i>Clostridium sordellii</i> <sup>a</sup><br>ATCC® 9714      | +                                | -    | -    | -    | -    | -    | -    | V    | -   | -               | -                                               | V   | +   | V   | V   | V   | V   | +           |
| <i>Parabacteroides distasonis</i> <sup>a</sup><br>ATCC® 8503 | -                                | +    | V    | +    | +    | +    | +    | -    | +   | +               | +                                               | +   | -   | +   | +   | +   | +   | -           |
| <i>Bacteroides uniformis</i><br>ATCC® 8492                   | -                                | +    | +    | +    | +    | +    | +    | +    | +   | +               | +                                               | +   | -   | -   | -   | -   | -   | +           |

+, positivo; -, negativo; V, variable

<sup>a</sup>Las principales cepas indicadoras presentan un rendimiento aceptable del sustrato más lábil en el sistema y reactividad en un número significativo de pocillos, de acuerdo con las recomendaciones para el control de calidad simplificado del Instituto de Normas para Laboratorios Clínicos.<sup>36</sup>



Diagrama diferencial RapID ANA II: Cocos

| Organism                                           | URE | BLTS | αARA | ONPG | αGLU | βGLU | αGAL | αFUC | NAG | PO <sub>4</sub> | LGY | GLY | PRO | PAL | ARG | SER | PYR | IND |
|----------------------------------------------------|-----|------|------|------|------|------|------|------|-----|-----------------|-----|-----|-----|-----|-----|-----|-----|-----|
| <i>Anaerococcus hydrogenalis</i> <sup>a</sup>      | 0   | 0    | 0    | 0    | 98   | 0    | 0    | 0    | 0   | 2               | 9   | 14  | 2   | 1   | 65  | 2   | 96  | 99  |
| <i>Anaerococcus prevotii</i> <sup>b</sup>          | 2   | 0    | 0    | 0    | 9    | 1    | 0    | 0    | 0   | 9               | 11  | 21  | 11  | 16  | 96  | 68  | 2   | 0   |
| <i>Anaerococcus tetradius</i> <sup>c</sup>         | 88  | 5    | 0    | 12   | 88   | 16   | 5    | 0    | 0   | 0               | 33  | 96  | 0   | 88  | 97  | 90  | 61  | 0   |
| <i>Blautia producta</i> <sup>d</sup>               | 0   | 51   | 0    | 99   | 99   | 96   | 56   | 0    | 52  | 0               | 0   | 2   | 0   | 2   | 9   | 6   | 0   | 0   |
| <i>Finexgoldia magna</i> <sup>e</sup>              | 0   | 0    | 0    | 0    | 2    | 0    | 0    | 0    | 2   | 6               | 95  | 96  | 2   | 82  | 98  | 95  | 98  | 0   |
| <i>Gemella morbillorum</i> <sup>f</sup>            | 0   | 0    | 0    | 18   | 80   | 1    | 0    | 0    | 0   | 68              | 71  | 73  | 88  | 93  | 99  | 98  | 4   | 0   |
| <i>Micromonas micros</i> <sup>g</sup>              | 0   | 0    | 0    | 0    | 4    | 0    | 0    | 0    | 5   | 93              | 95  | 98  | 92  | 88  | 98  | 96  | 86  | 0   |
| <i>Peptoniphilus asaccharolyticus</i> <sup>h</sup> | 0   | 0    | 0    | 0    | 3    | 1    | 0    | 0    | 0   | 4               | 11  | 22  | 5   | 20  | 96  | 21  | 8   | 99  |
| <i>Peptoniphilus indolicus</i> <sup>i</sup>        | 0   | 2    | 0    | 0    | 0    | 0    | 0    | 0    | 0   | 99              | 28  | 76  | 0   | 81  | 91  | 98  | 0   | 99  |
| <i>Peptostreptococcus anaerobius</i>               | 0   | 0    | 0    | 0    | 96   | 0    | 0    | 0    | 2   | 0               | 0   | 8   | 92  | 16  | 68  | 18  | 0   | 0   |
| <i>Staphylococcus saccharolyticus</i>              | 21  | 0    | 0    | 0    | 0    | 0    | 0    | 0    | 0   | 18              | 0   | 0   | 0   | 0   | 0   | 0   | 0   | 0   |
| <i>Streptococcus constellatus</i>                  | 0   | 0    | 0    | 0    | 46   | 91   | 18   | 0    | 12  | 94              | 82  | 97  | 6   | 98  | 99  | 93  | 6   | 0   |
| <i>Streptococcus intermedius</i>                   | 0   | 29   | 9    | 99   | 92   | 95   | 8    | 0    | 21  | 92              | 92  | 98  | 78  | 98  | 99  | 96  | 5   | 0   |
| <i>Veillonella spp.</i> <sup>j</sup>               | 0   | 0    | 0    | 0    | 4    | 0    | 0    | 0    | 0   | 59              | 2   | 9   | 1   | 5   | 38  | 16  | 83  | 0   |

<sup>a</sup>Previamente denominado *Peptostreptococcus hydrogenalis*.  
<sup>b</sup>Previamente denominado *Peptostreptococcus prevotii*.  
<sup>c</sup>Previamente denominado *Peptostreptococcus tetradius*.  
<sup>d</sup>Previamente denominado *Peptostreptococcus productus*.  
<sup>e</sup>Previamente denominado *Peptostreptococcus magnus*.

<sup>f</sup>Previamente denominado *Streptococcus morbillorum*.  
<sup>g</sup>Previamente denominado *Peptostreptococcus micros*.  
<sup>h</sup>Previamente denominado *Peptostreptococcus asaccharolyticus*.  
<sup>i</sup>Previamente denominado *Peptostreptococcus indolicus*.  
<sup>j</sup>Incluye tres especies procedentes de muestras clínicas humanas: *V. parvula*, *V. dispar* y *V. atypica*.

**LIMITACIONES**

- El uso del sistema RapID ANA II y la interpretación de resultados requiere los conocimientos de un técnico de laboratorio competente, con formación en los métodos de microbiología general y que haga un uso racional de la formación, la experiencia, la información de la muestra y otros procedimientos pertinentes antes de informar de la identificación obtenida con el sistema RapID ANA II.
- Cuando se use el sistema RapID ANA II se tendrá en cuenta el origen de la muestra, la tolerancia a la aerobiosis, las características de la tinción de Gram y el crecimiento en los medios de agar selectivo.
- El sistema RapID ANA II debe usarse con cultivos puros de los microorganismos de prueba. El uso de poblaciones microbianas mixtas o el estudio directo del material clínico sin un cultivo previo dará resultados anómalos.
- El sistema RapID ANA II está diseñado para usarse con los géneros que se enumeran en los diagramas diferenciales RapID ANA II. El uso de microorganismos que no se mencionen específicamente puede provocar errores de identificación.
- Los valores esperados en las pruebas del sistema RapID ANA II pueden diferir de los resultados de pruebas convencionales o de la información obtenida con anterioridad.
- La exactitud del sistema RapID ANA II se basa en el uso estadístico de varias pruebas diseñadas específicamente y de una base de datos exclusiva registrada. El uso de una sola prueba con el sistema RapID ANA II para establecer la identificación de un aislamiento, está sujeto al error inherente a esa prueba sola.

**CARACTERÍSTICAS DE FUNCIONAMIENTO**

Las características de funcionamiento del sistema RapID ANA II se han establecido mediante estudios de laboratorio de los cultivos de referencia y madre<sup>5,10,21-35</sup>.

**BIBLIOGRAFÍA**

- Blazevic, D.J. and G.M. Ederer. 1975. Principles of Biochemical Tests in Diagnostic Microbiology. John Wiley & Sons, New York, NY.
- Dowell, V.R., Jr. and T.M. Hawkins. 1977. Laboratory Methods in Anaerobic Bacteriology, CDC Laboratory Manual. U.S. Dept. of H.H.S. CDC, Atlanta, GA.
- Holdeman, L.V., E.P. Cato, and W.E.C. Moore. 1977. Anaerobe Laboratory Manual. 4<sup>th</sup> ed. Virginia Polytechnic Institute and State University, Blacksburg, VA.
- Barnes, E.H. and J.F. Morris. 1957. J. Bacteriol. 73:100-104.
- Dellinger, C.A. and L.V. Moore. 1986. J. Clin. Microbiol. 23:289-293.
- Guilbault, G.G. 1970. Enzymatic Methods of Analysis. p. 43-51. Pergamon Press, New York, NY.
- Kilian, M. and P. Bulow. 1976. Acta. Pathol. Microbiol. Scand. B. 84:245-251.
- Tharagonet, D., P.R. Sisson, C.M. Roxby, H.R. Ingham, and J.B. Selkon. 1977. J. Clin. Pathol. 30:505-509.
- Bodansky, O. and A.L. Latner. 1975. Advances in Clinical Chemistry. Vol. 17, p. 53-61. Academic Press, New York, NY.
- Celig, D.M. and P.C. Schreckenberger. 1991. J. Clin. Microbiol. 29:457-462.
- Nagatsu, T., M. Hino, H. Fuyamada, T. Hayakawa, S. Sakakibara, Y. Nakagawa, and T. Takemoto. 1976. Anal. Biochem. 74:466-476.
- Norris, J.R. and D.W. Ribbons. 1976. Methods in Microbiology. Vol. 9, p. 1-14. Academic Press, New York, NY.
- Peterson, E.H. and E.J. Hsu. 1978. J. Food Sci. 43:1853-1856.
- Westley, J.R., P.J. Anderson, V.A. Close, B. Halpern, and E.M. Lederberg. 1967. Appl. Microbiol. 15:822-825.
- Fay, G.D. and A.L. Barry. 1974. Appl. Microbiol. 15:822-825.
- Sutter, V.L. and W.T. Carter. 1972. J. Clin. Pathol. 58:335-339.
- Holdeman, L.V., E.P. Cato, and W.E.C. Moore. 1987. Anaerobe Laboratory Manual Update. Supplement to the 4<sup>th</sup> ed. Virginia Polytechnic Institute and State University, Blacksburg, VA.
- Summanen, P., E.J. Baron, D.M. Citron, C.A. Strong, H.M. Wexler, and S.M. Finegold. 1993. Wadsworth Anaerobic Bacteriology Manual. 5<sup>th</sup> ed. Star Publishing Company, Belmont, CA.
- Murray, P.R., E.J. Baron, J.H. Tenover, M.L. Landry, and M.A. Pfaller. 2007. Manual of Clinical Microbiology, 9<sup>th</sup> ed. ASM Press, Washington, D.C.
- Forbes, B.A., D.F. Sahm, and A.S. Weissfeld. 2007. Bailey and Scott's Diagnostic Microbiology, 12<sup>th</sup> ed. Mosby Elsevier, St. Louis, MO.
- Alexander, C.J., D.M. Citron, S. Hunt Gerardo, M.C. Claros, D. Talan, and E.J. Goldstein. 1997. J. Clin. Microbiol. 35:406-411.
- Appelbaum, P.C., C.S. Kaufman, J.C. Keifer, and J.J. Venbrux. 1984. J. Clin. Microbiol. 18:615-621.

- Appelbaum, P.C., J.W. Depenbusch, and C.S. Kaufman. 1984. Abstract C-153. Abstracts of the 84<sup>th</sup> General Meeting of the American Society for Microbiology. ASM, Washington, D.C.
- Burdash, N.M., K.A. Corey, P.J. Fortuna, M.L. Beasley, E.R. Bannister, and J.P. Manos. 1984. Abstract C-150. Abstracts of the 84<sup>th</sup> General Meeting of the American Society for Microbiology. ASM, Washington, D.C.
- Hamilton, L.T., C. Ayer, and D.N. Wright. 1985. Abstract C-159. Abstracts of the 85<sup>th</sup> General Meeting of the American Society for Microbiology. ASM, Washington, D.C.
- Hansen, S.L. and W.A. Pope. 1984. Abstract C-147. Abstracts of the 84<sup>th</sup> General Meeting of the American Society for Microbiology. ASM, Washington, D.C.
- Hudspeth, M.K., S. Hunt Gerardo, M.F. Maiden, D.M. Citron, and E.J. Goldstein. 1999. J. Clin. Microbiol. 37:2003-2006.
- Kaplan, R.L., M.J. O'Brian, and W. Landua. 1985. Abstract C-163. Abstracts of the 85<sup>th</sup> General Meeting of the American Society for Microbiology. ASM, Washington, D.C.
- Karachewski, N.O., E.L. Busch, and C.L. Wells. 1984. Abstract C-148. Abstracts of the 84<sup>th</sup> General Meeting of the American Society for Microbiology. ASM, Washington, D.C.
- Mangels, J., D. Berkley, and S. Wood. 1984. Abstract C-152. Abstracts of the 84<sup>th</sup> General Meeting of the American Society for Microbiology. ASM, Washington, D.C.
- Marler, L.M., J.A. Sider, L.C. Wolters, Y. Pettigrew, B.L. Skitt, and S.D. Allen. 1991. J. Clin. Microbiol. 29:874-878.
- Morgenstern, F. 1984. Abstract C-154. Abstracts of the 84<sup>th</sup> General Meeting of the American Society for Microbiology. ASM, Washington, D.C.
- Niles, A.C. and P.R. Murray. 1985. Abstract C-161. Abstracts of the 85<sup>th</sup> General Meeting of the American Society for Microbiology. ASM, Washington, D.C.
- Ristow K.L., P.C. Schreckenberger, D.M. Celig, M.A. Ulanday, and L.J. LeBeau. 1984. Abstract C-151. Abstracts of the 84<sup>th</sup> General Meeting of the American Society for Microbiology. ASM, Washington, D.C.
- Syed, S., W.J. Loesche, and C. Pearson. 1984. Abstract C-155. Abstracts of the 84<sup>th</sup> General Meeting of the American Society for Microbiology. ASM, Washington, D.C.
- Clinical and Laboratory Standards Institute. 2008. Quality Control for Commercial Microbial Identification Systems; Approved Guideline. M50-A. CLSI, Wayne, PA.

**PRESENTACIÓN**

REF R8311002, sistema RapID ANA II ..... 20 pruebas/estuche

**Símbolos**

|               |                                                       |
|---------------|-------------------------------------------------------|
|               | Contenido suficiente para < n > pruebas               |
| <b>REF</b>    | Número de catálogo                                    |
| <b>IVD</b>    | Dispositivo médico para diagnóstico <i>in vitro</i>   |
| <b>LAB</b>    | Para el uso del laboratorio                           |
|               | Consulte las instrucciones de uso                     |
|               | Límite de temperatura (temperatura de almacenamiento) |
| <b>LOT</b>    | Código de lote (número de lote)                       |
|               | Fecha de caducidad                                    |
| <b>EC REP</b> | Representante autorizado en Europa                    |
|               | Fabricante                                            |

RapID™ es una marca de Thermo Fisher Scientific y sus filiales.  
 ERIC™ es una marca de Thermo Fisher Scientific y sus filiales.  
 ATCC® es una marca registrada de American Type Culture Collection.

|               |                                                                                                                                                     |
|---------------|-----------------------------------------------------------------------------------------------------------------------------------------------------|
|               | 12076 Santa Fe Drive<br>Lenexa, KS 66215, USA<br><a href="http://www.remel.com">www.remel.com</a> , (800) 255-6730<br>International: (913) 888-0939 |
| <b>EC REP</b> | Remel Europe Ltd.<br>Clipper Boulevard West, Crossways<br>Dartford, Kent, DA2 6PT, UK                                                               |

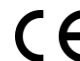

Para obtener asistencia técnica póngase en contacto con su distribuidor local.

Diagrama diferencial RapID ANA II: Bacilos gramnegativos

| Organism                                            | URE | BLTS | αARA | ONPG | αGLU | βGLU | αGAL | αFUC | NAG | PO <sub>4</sub> | LGY | GLY | PRO | PAL | ARG | SER | PYR | IND |
|-----------------------------------------------------|-----|------|------|------|------|------|------|------|-----|-----------------|-----|-----|-----|-----|-----|-----|-----|-----|
| <i>Bacteroides caccae</i>                           | 0   | 79   | 98   | 99   | 88   | 96   | 99   | 97   | 99  | 99              | 96  | 91  | 5   | 75  | 98  | 72  | 0   | 0   |
| <i>Bacteroides eggerthii</i>                        | 0   | 39   | 77   | 93   | 99   | 98   | 42   | 0    | 99  | 98              | 97  | 13  | 0   | 0   | 32  | 5   | 0   | 99  |
| <i>Bacteroides fragilis</i>                         | 0   | 89   | 3    | 94   | 98   | 97   | 98   | 98   | 98  | 98              | 98  | 81  | 1   | 79  | 98  | 81  | 74  | 0   |
| <i>Bacteroides ovatus</i>                           | 0   | 95   | 96   | 88   | 98   | 95   | 98   | 93   | 99  | 98              | 96  | 84  | 0   | 0   | 3   | 2   | 0   | 99  |
| <i>Bacteroides stercoris</i>                        | 0   | 45   | 9    | 22   | 99   | 31   | 0    | 70   | 99  | 99              | 98  | 9   | 0   | 0   | 2   | 4   | 0   | 98  |
| <i>Bacteroides pyogenes</i> <sup>a</sup>            | 0   | 9    | 0    | 92   | 99   | 49   | 2    | 93   | 99  | 99              | 99  | 9   | 0   | 13  | 70  | 22  | 0   | 0   |
| <i>Bacteroides thetaiotaomicron</i>                 | 0   | 92   | 91   | 96   | 98   | 96   | 98   | 98   | 98  | 94              | 98  | 67  | 1   | 49  | 98  | 77  | 3   | 99  |
| <i>Bacteroides uniformis</i>                        | 0   | 93   | 81   | 98   | 99   | 97   | 92   | 93   | 99  | 98              | 98  | 6   | 0   | 2   | 3   | 0   | 0   | 99  |
| <i>Bacteroides vulgatus</i>                         | 0   | 3    | 85   | 95   | 99   | 0    | 99   | 99   | 99  | 95              | 98  | 82  | 4   | 1   | 85  | 52  | 84  | 0   |
| <i>Bilophila wadsworthia</i>                        | 91  | 0    | 0    | 0    | 0    | 0    | 0    | 0    | 0   | 2               | 0   | 2   | 0   | 0   | 95  | 1   | 0   | 0   |
| <i>Campylobacter gracilis</i> <sup>b</sup>          | 0   | 0    | 0    | 0    | 0    | 0    | 0    | 0    | 0   | 0               | 0   | 6   | 0   | 0   | 93  | 5   | 0   | 0   |
| <i>Campylobacter ureolyticus</i> <sup>c</sup>       | 99  | 0    | 0    | 0    | 0    | 0    | 0    | 0    | 0   | 0               | 16  | 8   | 5   | 2   | 82  | 6   | 3   | 0   |
| <i>Capnocytophaga</i> spp.                          | 0   | 42   | 0    | 89   | 96   | 86   | 2    | 1    | 78  | 76              | 99  | 99  | 90  | 99  | 99  | 95  | 13  | 0   |
| <i>Fusobacterium mortiferum</i>                     | 0   | 12   | 0    | 62   | 2    | 70   | 92   | 0    | 0   | 92              | 28  | 42  | 0   | 60  | 96  | 86  | 91  | 0   |
| <i>Fusobacterium necrophorum</i>                    | 0   | 0    | 0    | 0    | 0    | 0    | 0    | 0    | 0   | 38              | 0   | 0   | 0   | 0   | 15  | 2   | 0   | 99  |
| <i>Fusobacterium nucleatum</i>                      | 0   | 0    | 0    | 0    | 0    | 0    | 0    | 0    | 0   | 2               | 0   | 0   | 0   | 0   | 45  | 0   | 36  | 99  |
| <i>Fusobacterium varium</i>                         | 0   | 4    | 0    | 0    | 0    | 0    | 8    | 0    | 2   | 0               | 16  | 72  | 2   | 41  | 98  | 88  | 99  | 60  |
| <i>Odoribacter splanchnicus</i> <sup>d</sup>        | 0   | 8    | 4    | 95   | 0    | 8    | 93   | 92   | 99  | 73              | 91  | 14  | 9   | 34  | 99  | 84  | 99  | 99  |
| <i>Parabacteroides distasonis</i> <sup>e</sup>      | 0   | 90   | 67   | 96   | 99   | 91   | 96   | 0    | 99  | 94              | 96  | 94  | 0   | 70  | 98  | 98  | 91  | 0   |
| <i>Parabacteroides merdae</i> <sup>f</sup>          | 0   | 20   | 12   | 99   | 38   | 29   | 99   | 0    | 98  | 22              | 98  | 99  | 0   | 14  | 99  | 25  | 2   | 0   |
| <i>Porphyromonas asaccharolytica</i>                | 0   | 2    | 0    | 0    | 0    | 0    | 0    | 94   | 0   | 96              | 92  | 22  | 0   | 14  | 60  | 45  | 0   | 99  |
| <i>Porphyromonas endodontalis</i>                   | 0   | 0    | 0    | 0    | 0    | 0    | 0    | 0    | 29  | 95              | 98  | 0   | 0   | 0   | 5   | 2   | 0   | 99  |
| <i>Porphyromonas gingivalis</i>                     | 0   | 2    | 0    | 2    | 0    | 0    | 0    | 0    | 99  | 95              | 96  | 19  | 0   | 5   | 93  | 27  | 27  | 99  |
| <i>Prevotella bivia</i>                             | 0   | 2    | 0    | 97   | 99   | 0    | 0    | 91   | 99  | 98              | 98  | 95  | 2   | 4   | 75  | 24  | 0   | 0   |
| <i>Prevotella buccae</i>                            | 0   | 71   | 31   | 91   | 99   | 94   | 99   | 0    | 1   | 99              | 97  | 10  | 0   | 5   | 6   | 0   | 0   | 0   |
| <i>Prevotella buccalis/veroralis</i>                | 0   | 0    | 0    | 99   | 99   | 6    | 99   | 8    | 95  | 99              | 99  | 98  | 0   | 0   | 0   | 0   | 0   | 0   |
| <i>Prevotella corporis</i>                          | 0   | 0    | 0    | 0    | 98   | 0    | 0    | 29   | 0   | 98              | 96  | 0   | 0   | 0   | 98  | 14  | 6   | 0   |
| <i>Prevotella denticola</i>                         | 0   | 0    | 0    | 99   | 99   | 0    | 91   | 99   | 99  | 99              | 99  | 7   | 0   | 0   | 0   | 0   | 0   | 0   |
| <i>Prevotella disiens</i>                           | 0   | 2    | 0    | 0    | 99   | 0    | 7    | 0    | 0   | 99              | 98  | 90  | 0   | 2   | 90  | 29  | 0   | 0   |
| <i>Prevotella intermedia</i>                        | 0   | 0    | 0    | 0    | 99   | 0    | 0    | 93   | 0   | 98              | 98  | 4   | 0   | 0   | 96  | 6   | 0   | 99  |
| <i>Prevotella loescheii</i>                         | 0   | 0    | 0    | 97   | 98   | 79   | 81   | 80   | 99  | 99              | 99  | 9   | 0   | 1   | 4   | 2   | 0   | 0   |
| <i>Prevotella melaninogenica</i>                    | 0   | 1    | 16   | 98   | 92   | 0    | 90   | 92   | 99  | 98              | 99  | 5   | 0   | 0   | 98  | 2   | 0   | 0   |
| <i>Prevotella oralis</i> Group                      | 0   | 92   | 0    | 92   | 96   | 89   | 91   | 78   | 96  | 98              | 98  | 90  | 0   | 0   | 5   | 2   | 0   | 0   |
| <i>Prevotella oris</i>                              | 0   | 98   | 99   | 88   | 99   | 89   | 78   | 98   | 99  | 99              | 98  | 11  | 0   | 0   | 2   | 0   | 0   | 0   |
| <i>Pseudoflavonifractor capillosus</i> <sup>g</sup> | 0   | 87   | 9    | 95   | 30   | 92   | 0    | 98   | 99  | 96              | 90  | 36  | 0   | 0   | 2   | 5   | 0   | 0   |
| <i>Tannerella forsythia</i> <sup>h</sup>            | 0   | 78   | 0    | 95   | 99   | 50   | 0    | 99   | 99  | 99              | 98  | 12  | 0   | 31  | 99  | 81  | 0   | 98  |
| <i>Wolinella</i> spp.                               | 0   | 0    | 0    | 0    | 0    | 5    | 0    | 0    | 0   | 5               | 0   | 0   | 0   | 0   | 88  | 0   | 0   | 0   |

Gram-Variable Bacilli:

|                                    |   |    |    |    |    |    |    |    |    |    |    |    |    |    |    |   |   |   |
|------------------------------------|---|----|----|----|----|----|----|----|----|----|----|----|----|----|----|---|---|---|
| <i>Clostridium clostridioforme</i> | 0 | 84 | 90 | 84 | 85 | 87 | 98 | 0  | 81 | 2  | 93 | 9  | 1  | 13 | 47 | 2 | 7 | 6 |
| <i>Clostridium ramosum</i>         | 0 | 90 | 0  | 84 | 99 | 99 | 76 | 0  | 99 | 0  | 29 | 2  | 0  | 0  | 33 | 0 | 0 | 0 |
| <i>Mobiluncus curtisii</i>         | 0 | 26 | 2  | 31 | 99 | 5  | 95 | 15 | 0  | 5  | 28 | 32 | 99 | 86 | 90 | 5 | 0 | 0 |
| <i>Mobiluncus mulieris</i>         | 0 | 26 | 2  | 31 | 99 | 5  | 0  | 15 | 0  | 5  | 28 | 32 | 99 | 86 | 90 | 5 | 0 | 0 |
| <i>Tissierella praeacuta</i>       | 0 | 0  | 0  | 0  | 0  | 0  | 0  | 0  | 0  | 85 | 88 | 26 | 0  | 0  | 92 | 0 | 0 | 0 |

<sup>a</sup>Denominado previamente *Bacteroides tectum*.

<sup>b</sup>Denominado previamente *Bacteroides gracilis*

<sup>c</sup>Denominado previamente *Bacteroides ureolyticus*.

<sup>d</sup>Denominado previamente *Bacteroides splanchnicus*.

<sup>e</sup>Denominado previamente *Bacteroides distasonis*.

<sup>f</sup>Denominado previamente *Bacteroides merdae*.

<sup>g</sup>Denominado previamente *Bacteroides capillosus*.

<sup>h</sup>Denominado previamente *Bacteroides forsythus*.

Diagrama diferencial Rapid ANA II: Bacilos grampositivos

| Organism                                          | URE | BLTS | αARA | ONPG | αGLU | βGLU | αGAL | αFUC | NAG | PO <sub>4</sub> | LGY | GLY | PRO | PAL | ARG | SER | PYR | IND |
|---------------------------------------------------|-----|------|------|------|------|------|------|------|-----|-----------------|-----|-----|-----|-----|-----|-----|-----|-----|
| <i>Actinomyces bovis</i>                          | 0   | 0    | 0    | 0    | 0    | 12   | 0    | 0    | 99  | 0               | 99  | 99  | 99  | 86  | 99  | 99  | 0   | 0   |
| <i>Actinomyces israelii</i>                       | 0   | 29   | 61   | 87   | 99   | 97   | 93   | 0    | 2   | 2               | 86  | 92  | 99  | 98  | 98  | 64  | 19  | 0   |
| <i>Actinomyces meyeri</i>                         | 0   | 2    | 0    | 69   | 93   | 0    | 0    | 0    | 79  | 0               | 92  | 98  | 99  | 78  | 98  | 96  | 38  | 0   |
| <i>Actinomyces naeslundii</i>                     | 90  | 15   | 0    | 96   | 86   | 96   | 93   | 0    | 0   | 15              | 57  | 80  | 97  | 87  | 65  | 10  | 0   | 0   |
| <i>Actinomyces odontolyticus</i>                  | 0   | 4    | 15   | 86   | 96   | 46   | 5    | 92   | 5   | 20              | 92  | 98  | 99  | 82  | 98  | 98  | 0   | 0   |
| <i>Actinomyces turicensis</i>                     | 0   | 0    | 0    | 0    | 99   | 0    | 0    | 28   | 0   | 0               | 88  | 91  | 96  | 90  | 99  | 96  | 0   | 0   |
| <i>Actinomyces viscosus</i>                       | 81  | 76   | 0    | 91   | 99   | 92   | 62   | 0    | 0   | 0               | 76  | 98  | 99  | 86  | 92  | 33  | 0   | 0   |
| <i>Arcanobacterium pyogenes</i> <sup>a</sup>      | 0   | 12   | 15   | 86   | 0    | 0    | 0    | 0    | 99  | 75              | 93  | 96  | 96  | 86  | 98  | 96  | 2   | 0   |
| <i>Atopobium minutum</i> <sup>b</sup>             | 0   | 0    | 0    | 0    | 0    | 26   | 99   | 0    | 0   | 0               | 0   | 12  | 0   | 0   | 98  | 33  | 0   | 0   |
| <i>Bifidobacterium</i> spp.                       | 0   | 79   | 87   | 90   | 99   | 87   | 92   | 0    | 2   | 2               | 11  | 74  | 93  | 95  | 98  | 93  | 0   | 0   |
| <i>Clostridium baratii</i>                        | 0   | 88   | 0    | 87   | 16   | 76   | 93   | 0    | 96  | 0               | 0   | 0   | 0   | 0   | 82  | 0   | 97  | 0   |
| <i>Clostridium beijerinckii</i>                   | 0   | 42   | 0    | 51   | 99   | 98   | 79   | 0    | 0   | 0               | 0   | 0   | 0   | 0   | 0   | 0   | 0   | 0   |
| <i>Clostridium bifermentans</i>                   | 0   | 0    | 0    | 0    | 2    | 0    | 0    | 2    | 68  | 4               | 0   | 5   | 99  | 38  | 86  | 88  | 3   | 94  |
| <i>Clostridium botulinum</i> f                    | 0   | 0    | 0    | 0    | 82   | 26   | 0    | 0    | 0   | 0               | 0   | 0   | 99  | 98  | 98  | 98  | 0   | 0   |
| <i>Clostridium botulinum</i> If <sup>c</sup>      | 0   | 0    | 0    | 0    | 99   | 0    | 0    | 0    | 60  | 9               | 0   | 0   | 0   | 0   | 0   | 0   | 0   | 0   |
| <i>Clostridium butyricum</i>                      | 0   | 9    | 85   | 91   | 98   | 0    | 99   | 2    | 0   | 0               | 0   | 0   | 3   | 0   | 9   | 6   | 0   | 0   |
| <i>Clostridium cadaveris</i>                      | 0   | 0    | 0    | 0    | 0    | 0    | 0    | 94   | 99  | 0               | 2   | 7   | 0   | 7   | 87  | 9   | 98  | 99  |
| <i>Clostridium clostridioforme</i>                | 0   | 84   | 90   | 84   | 85   | 87   | 98   | 0    | 81  | 2               | 93  | 9   | 1   | 13  | 47  | 2   | 7   | 6   |
| <i>Clostridium difficile</i>                      | 0   | 2    | 0    | 2    | 8    | 3    | 0    | 0    | 0   | 9               | 2   | 0   | 99  | 43  | 48  | 16  | 6   | 0   |
| <i>Clostridium glycolicum</i>                     | 0   | 0    | 0    | 10   | 0    | 16   | 0    | 0    | 9   | 99              | 0   | 2   | 99  | 0   | 35  | 9   | 46  | 0   |
| <i>Clostridium hastiforme</i>                     | 0   | 0    | 1    | 0    | 0    | 0    | 0    | 0    | 5   | 2               | 88  | 62  | 92  | 72  | 95  | 98  | 0   | 0   |
| <i>Clostridium histolyticum</i>                   | 0   | 0    | 0    | 9    | 0    | 0    | 0    | 0    | 0   | 0               | 3   | 9   | 0   | 98  | 96  | 91  | 98  | 0   |
| <i>Clostridium innocuum</i>                       | 0   | 5    | 0    | 0    | 20   | 36   | 5    | 0    | 18  | 5               | 2   | 11  | 0   | 76  | 90  | 7   | 80  | 0   |
| <i>Clostridium limosum</i>                        | 0   | 0    | 0    | 0    | 0    | 0    | 0    | 0    | 0   | 0               | 0   | 0   | 0   | 20  | 11  | 0   | 0   | 0   |
| <i>Clostridium novyi</i> A                        | 0   | 0    | 0    | 0    | 0    | 0    | 0    | 0    | 0   | 59              | 0   | 0   | 0   | 0   | 47  | 0   | 0   | 0   |
| <i>Clostridium paraputrificum</i>                 | 0   | 51   | 2    | 99   | 9    | 94   | 5    | 0    | 96  | 6               | 0   | 0   | 0   | 0   | 5   | 0   | 94  | 0   |
| <i>Clostridium perfringens</i>                    | 0   | 39   | 69   | 98   | 76   | 36   | 96   | 18   | 98  | 81              | 2   | 26  | 4   | 80  | 92  | 43  | 96  | 0   |
| <i>Clostridium ramosum</i>                        | 0   | 90   | 0    | 84   | 99   | 99   | 76   | 0    | 99  | 0               | 29  | 2   | 0   | 0   | 33  | 0   | 0   | 0   |
| <i>Clostridium septicum</i>                       | 0   | 2    | 16   | 99   | 14   | 0    | 2    | 0    | 99  | 0               | 0   | 0   | 0   | 0   | 10  | 9   | 5   | 0   |
| <i>Clostridium sordellii</i>                      | 98  | 0    | 0    | 0    | 26   | 0    | 0    | 42   | 0   | 28              | 9   | 24  | 99  | 79  | 98  | 92  | 27  | 98  |
| <i>Clostridium sporogenes</i>                     | 0   | 0    | 0    | 7    | 39   | 32   | 0    | 0    | 0   | 2               | 2   | 5   | 99  | 15  | 9   | 16  | 92  | 0   |
| <i>Clostridium subterminale</i>                   | 0   | 0    | 0    | 2    | 0    | 5    | 0    | 36   | 0   | 3               | 63  | 33  | 3   | 36  | 80  | 69  | 94  | 0   |
| <i>Clostridium tertium</i>                        | 0   | 84   | 76   | 98   | 47   | 26   | 96   | 2    | 99  | 8               | 0   | 0   | 11  | 0   | 91  | 5   | 8   | 0   |
| <i>Clostridium tetani</i>                         | 0   | 0    | 0    | 0    | 0    | 0    | 0    | 0    | 0   | 13              | 0   | 0   | 0   | 0   | 66  | 0   | 0   | 26  |
| <i>Collinsella aerofaciens</i> <sup>d</sup>       | 0   | 77   | 9    | 2    | 76   | 10   | 5    | 0    | 20  | 13              | 5   | 9   | 93  | 26  | 97  | 56  | 0   | 0   |
| <i>Eggerthella lenta</i> <sup>e</sup>             | 0   | 0    | 0    | 0    | 3    | 0    | 0    | 0    | 2   | 0               | 0   | 11  | 1   | 5   | 97  | 73  | 0   | 0   |
| <i>Eubacterium limosum</i>                        | 0   | 0    | 0    | 0    | 0    | 7    | 0    | 0    | 0   | 12              | 95  | 18  | 9   | 16  | 5   | 0   | 0   | 0   |
| <i>Lactobacillus acidophilus</i>                  | 0   | 81   | 0    | 21   | 91   | 99   | 12   | 0    | 73  | 0               | 99  | 98  | 90  | 76  | 98  | 98  | 78  | 0   |
| <i>Lactobacillus casei</i>                        | 0   | 89   | 0    | 70   | 78   | 96   | 0    | 22   | 99  | 5               | 82  | 97  | 80  | 16  | 98  | 90  | 90  | 0   |
| <i>Lactobacillus catenaforme</i>                  | 0   | 5    | 0    | 9    | 99   | 99   | 5    | 0    | 93  | 0               | 0   | 71  | 0   | 0   | 98  | 0   | 88  | 0   |
| <i>Lactobacillus fermentum</i>                    | 0   | 26   | 2    | 96   | 86   | 0    | 99   | 0    | 0   | 0               | 5   | 81  | 0   | 88  | 98  | 96  | 0   | 0   |
| <i>Lactobacillus jensenii</i>                     | 0   | 71   | 1    | 0    | 82   | 99   | 2    | 0    | 5   | 0               | 0   | 93  | 99  | 98  | 98  | 95  | 0   | 0   |
| <i>Mobiluncus curtisii</i>                        | 0   | 19   | 0    | 12   | 99   | 5    | 95   | 11   | 0   | 5               | 26  | 30  | 99  | 80  | 95  | 3   | 0   | 0   |
| <i>Mobiluncus mulieris</i>                        | 0   | 26   | 2    | 31   | 99   | 5    | 0    | 15   | 0   | 3               | 27  | 32  | 99  | 85  | 90  | 5   | 0   | 0   |
| <i>Propionibacterium acnes</i>                    | 0   | 0    | 0    | 5    | 52   | 0    | 0    | 0    | 88  | 2               | 96  | 98  | 98  | 48  | 98  | 96  | 71  | 85  |
| <i>Propionibacterium granulosum</i>               | 0   | 0    | 5    | 0    | 82   | 0    | 67   | 0    | 0   | 0               | 98  | 98  | 99  | 33  | 96  | 60  | 0   | 0   |
| <i>Propionibacterium propionicum</i> <sup>f</sup> | 0   | 18   | 2    | 78   | 99   | 0    | 99   | 12   | 0   | 0               | 75  | 75  | 65  | 88  | 98  | 12  | 0   | 0   |

<sup>a</sup>Previamente denominado *Actinomyces pyogenes*.

<sup>b</sup>Previamente denominado *Lactobacillus minutis*.

<sup>c</sup>*C. botulinum* Grupo I está formado por cepas de toxina tipo A y cepas proteolíticas de toxina tipo B y F.

<sup>d</sup>*C. botulinum* Grupo II está formado por cepas de toxina tipo E y cepas no proteolíticas de toxina tipo B y F.

<sup>e</sup>Previamente denominado *Eubacterium aerofaciens*.

<sup>f</sup>Previamente denominado *Eubacterium lentum*.

<sup>g</sup>Previamente denominado *Propionibacterium propionicus*.
